# Supplementary material for: Reactivities of zero-valent group 10 complexes toward organic isocyanates: synthesis of metallacycles containing dimeric isocyanate units, isocyanate cyclotrimerization, and computational chemistry
Source: Royal Society of Chemistry journal article supplement (doi:10.1039/c9nj03332g), 2019-01-01

## Electronic Supplementary Information (ESI)

### Reactivities of zero-valent group 10 complexes toward organic isocyanates: synthesis of metallacycles containing dimeric isocyanate units, isocyanate cyclotrimerization, and computational chemistry

Young-Sung Han,<sup>a,b</sup> Kang-Yeoun Jung,<sup>b</sup> Yong-Joo Kim,<sup>a\*</sup> Kyoung Koo Baeck,<sup>a\*</sup> Gang Min Lee,<sup>c</sup> Soon W. Lee<sup>c</sup>

<sup>a</sup>Department of Chemistry, Kangnung-Wonju National University, Gangneung 210-702,  
Korea

<sup>b</sup>Department of Biochemical Engineering, Kangnung-Wonju National University, Gangneung  
210-702, Korea

<sup>c</sup>Department of Chemistry, Sungkyunkwan University, Suwon 440-746, Korea

#### Table of contents

1. Details of crystal data, intensity collection, and refinement details are given in **Table - SM1**.
2. The total energy including ZPE in **Table -SM2**
3. The full detail of atomic coordinates in **Table-SM3**

**Figure 1S.** <sup>1</sup>H, <sup>13</sup>C{<sup>1</sup>H} and <sup>31</sup>P{<sup>1</sup>H}-NMR spectra of *cis*-[Pd{-N(Ar)C(O)N(Ar)C(O)-}(PR<sub>3</sub>)<sub>2</sub>]  
(PR<sub>3</sub> = PMe<sub>3</sub>, Ar = 1-naphthyl), **1** in CDCl<sub>3</sub>. <sup>1</sup>H-(300 MHz), <sup>13</sup>C-NMR (75 MHz), and <sup>31</sup>P (242  
MHz).

**Figure 2S.** <sup>1</sup>H, <sup>13</sup>C{<sup>1</sup>H} and <sup>31</sup>P{<sup>1</sup>H}-NMR spectra of *cis*-[Pd{-N(Ar)C(O)N(Ar)C(O)-}(PR<sub>3</sub>)<sub>2</sub>] (PR<sub>3</sub> =  
PMe<sub>3</sub>, Ar = 4-phenoxyphenyl), **2** in CDCl<sub>3</sub>. <sup>1</sup>H-(600 MHz), <sup>13</sup>C-NMR (150 MHz), and <sup>31</sup>P  
(242 MHz).

**Figure 3S.** <sup>1</sup>H, <sup>13</sup>C{<sup>1</sup>H} and <sup>31</sup>P{<sup>1</sup>H}-NMR spectra of [Pd(PMe<sub>3</sub>){-C(O)N(R)C(O)N(R)-}]<sub>4</sub> (R = 3-  
methylbenzyl), **3** in CDCl<sub>3</sub>. <sup>1</sup>H-(600 MHz), <sup>13</sup>C-NMR (150 MHz), and <sup>31</sup>P (242 MHz).

**Figure 4S.** <sup>1</sup>H, <sup>13</sup>C{<sup>1</sup>H} and <sup>31</sup>P{<sup>1</sup>H}-NMR spectra of [Pd(PMe<sub>3</sub>){-C(O)N(R)C(O)N(R)-}]<sub>4</sub> (R =

- 4-methylbenzyl), **4** in CDCl<sub>3</sub>. <sup>1</sup>H-(600 MHz), <sup>13</sup>C-NMR (150 MHz), and <sup>31</sup>P (242 MHz).
- Figure 5S.** <sup>1</sup>H, <sup>13</sup>C{<sup>1</sup>H} and <sup>31</sup>P{<sup>1</sup>H}-NMR spectra of [Pd(PMe<sub>3</sub>)<sub>2</sub>]-C(O)N(R)C(O)N(R)-<sub>4</sub> (R = 4-phenoxybenzyl), **5** in CDCl<sub>3</sub>. <sup>1</sup>H-(600 MHz), <sup>13</sup>C-NMR (150 MHz), and <sup>31</sup>P (242 MHz).
- Figure 6S.** <sup>1</sup>H and <sup>13</sup>C{<sup>1</sup>H} -NMR spectra of (R-NCO)<sub>3</sub> (R = 3-methylbenzyl), **6** in CDCl<sub>3</sub>. <sup>1</sup>H-(600 MHz) and <sup>13</sup>C-NMR (150 MHz).
- Figure 7S.** <sup>1</sup>H and <sup>13</sup>C{<sup>1</sup>H} -NMR spectra of (R-NCO)<sub>3</sub> (R = 4-methylbenzyl), **7** in CDCl<sub>3</sub>. <sup>1</sup>H-(300 MHz) and <sup>13</sup>C-NMR (150 MHz).
- Figure 8S.** <sup>1</sup>H and <sup>13</sup>C{<sup>1</sup>H} -NMR spectra of (R-NCO)<sub>3</sub> (R = 4-phenoxybenzyl), **8** in CDCl<sub>3</sub>. <sup>1</sup>H-(600 MHz) and <sup>13</sup>C-NMR (150 MHz).
- Figure 9S.** <sup>1</sup>H, <sup>13</sup>C{<sup>1</sup>H} and <sup>31</sup>P{<sup>1</sup>H}-NMR spectra of *cis*-[Pt{N(R)C(O)N(R)C(O)}(PMe<sub>3</sub>)<sub>2</sub>] (R = 3-methylbenzyl), **9** in CDCl<sub>3</sub>. <sup>1</sup>H-(300 MHz), <sup>13</sup>C-NMR (150 MHz), and <sup>31</sup>P (242 MHz).
- Figure 10S.** <sup>1</sup>H, <sup>13</sup>C{<sup>1</sup>H} and <sup>31</sup>P{<sup>1</sup>H}-NMR spectra of *cis*-[Pt{N(R)C(O)N(R)C(O)}(PMe<sub>3</sub>)<sub>2</sub>] (R = 4-methylbenzyl), **10** in CDCl<sub>3</sub>. <sup>1</sup>H-(600 MHz), <sup>13</sup>C-NMR (150 MHz), and <sup>31</sup>P (242 MHz)
- Figure 11S.** <sup>1</sup>H, <sup>13</sup>C{<sup>1</sup>H} and <sup>31</sup>P{<sup>1</sup>H}-NMR spectra of *cis*-[Pt{-N(R)C(O)N(R)C(O)}(PMe<sub>3</sub>)<sub>2</sub>] (R = 4-fluorobenzyl), **11** in CDCl<sub>3</sub>. <sup>1</sup>H-(600 MHz), <sup>13</sup>C-NMR (150 MHz), and <sup>31</sup>P (242 MHz)
- Figure 12S.** <sup>1</sup>H, <sup>13</sup>C{<sup>1</sup>H} and <sup>31</sup>P{<sup>1</sup>H}-NMR spectra of *cis*-[Pt{- (R)C(O)N(R)C(O)-}(PMe<sub>3</sub>)<sub>2</sub>] (R = 4-methoxybenzyl), **12** in CDCl<sub>3</sub>. <sup>1</sup>H-(600 MHz), <sup>13</sup>C-NMR (150 MHz), and <sup>31</sup>P (242 MHz).
- Figure 13S.** <sup>1</sup>H, <sup>13</sup>C{<sup>1</sup>H} and <sup>31</sup>P{<sup>1</sup>H}-NMR spectra of *cis*-[Pt{-N(R)C(O)N(R)C(O)-}(PMe<sub>3</sub>)<sub>2</sub>] {R = (S)-(+)-1-(1-naphthyl)ethyl}, **13** in CDCl<sub>3</sub>. <sup>1</sup>H-(600 MHz), <sup>13</sup>C-NMR (150 MHz), and <sup>31</sup>P (242 MHz).
- Figure 14S.** <sup>1</sup>H, <sup>13</sup>C{<sup>1</sup>H} and <sup>31</sup>P{<sup>1</sup>H}-NMR spectra of *cis*-[Pt{N(R)C(O)N(R)C(O)-}(PMe<sub>3</sub>)<sub>2</sub>] {R = (R)-(-)-1-(1-naphthyl)ethyl }, **14** in CDCl<sub>3</sub>. <sup>1</sup>H-400 MHz, <sup>13</sup>C-NMR (100 MHz), and <sup>31</sup>P (162 MHz).
- Figure 15S.** <sup>1</sup>H, <sup>13</sup>C{<sup>1</sup>H} and <sup>31</sup>P{<sup>1</sup>H}-NMR spectra of *cis*-[Pt{-N(R)C(O)N(R)C(O)-}(PMe<sub>3</sub>)<sub>2</sub>] (R = 4-phenoxyphenyl), **15** in CDCl<sub>3</sub>. <sup>1</sup>H-(600 MHz), <sup>13</sup>C-NMR (150 MHz), and <sup>31</sup>P (242 MHz).
- Figure 16S.** <sup>1</sup>H, <sup>13</sup>C{<sup>1</sup>H} and <sup>31</sup>P{<sup>1</sup>H}-NMR spectra of *cis*-[Pt{-N(R)C(O)N(R)C(O)-}(PMe<sub>3</sub>)<sub>2</sub>] (R = 2,6-difluorophenyl), **16** in CDCl<sub>3</sub>. <sup>1</sup>H-(600 MHz), <sup>13</sup>C-NMR (150 MHz), and <sup>31</sup>P (242 MHz).
- Figure 17S.** <sup>1</sup>H, <sup>13</sup>C{<sup>1</sup>H} and <sup>31</sup>P{<sup>1</sup>H}-NMR spectra of Pt(DEPE){-N(R)C(O)N(R)C(O)-} {R = (S)-(+)-1-(1-naphthyl)ethyl}, **17** in CDCl<sub>3</sub>. <sup>1</sup>H-(400 MHz), <sup>13</sup>C-NMR (100 MHz), and <sup>31</sup>P (160 MHz).
- Figure 18S.** <sup>1</sup>H, <sup>13</sup>C{<sup>1</sup>H} and <sup>31</sup>P{<sup>1</sup>H}-NMR spectra of Pt(DEPE){-N(R)C(O)N(R)C(O)-} {R = (R)-(-)-1-(1-naphthyl)ethyl }, **18** in CDCl<sub>3</sub>. <sup>1</sup>H-(600 MHz), <sup>13</sup>C-NMR (150 MHz), and <sup>31</sup>P (242 MHz).

**Figure 19S.**  $^1\text{H}$  and  $^{13}\text{C}\{^1\text{H}\}$  -NMR spectra of [SIPr•Benzyl-NCO], **19** in  $\text{CDCl}_3$ .  $^1\text{H}$ -(300 MHz) and  $^{13}\text{C}$ -NMR (75 MHz).

**Figure 20S.**  $^1\text{H}$  and  $^{13}\text{C}\{^1\text{H}\}$  -NMR spectra of [IPr•Phenyl-NCO], **20** in  $\text{CDCl}_3$ .  $^1\text{H}$ -(300 MHz) and  $^{13}\text{C}$ -NMR (75 MHz).

**Table SM1.** Details of crystal data, intensity collection, and refinement details.

| complex                                       | 10.Et <sub>2</sub> O                                                            | 16                                                                                             | 17                                                                              | 18                                                                              | 19                                               |
|-----------------------------------------------|---------------------------------------------------------------------------------|------------------------------------------------------------------------------------------------|---------------------------------------------------------------------------------|---------------------------------------------------------------------------------|--------------------------------------------------|
| formula                                       | C <sub>28</sub> H <sub>46</sub> N <sub>2</sub> O <sub>3</sub> P <sub>2</sub> Pt | C <sub>20</sub> H <sub>24</sub> F <sub>4</sub> N <sub>2</sub> O <sub>2</sub> P <sub>2</sub> Pt | C <sub>36</sub> H <sub>46</sub> N <sub>2</sub> O <sub>2</sub> P <sub>2</sub> Pt | C <sub>36</sub> H <sub>46</sub> N <sub>2</sub> O <sub>2</sub> P <sub>2</sub> Pt | C <sub>35</sub> H <sub>45</sub> N <sub>3</sub> O |
| fw                                            | 715.70                                                                          | 657.44                                                                                         | 795.78                                                                          | 795.78                                                                          | 523.74                                           |
| temperature, K                                | 223(2)                                                                          | 223(2)                                                                                         | 223(2)                                                                          | 223(2)                                                                          | 223(2)                                           |
| crystal size (mm)                             | 0.19 × 0.12 × 0.10                                                              | 0.26 × 0.18 × 0.10                                                                             | 0.16 × 0.09 × 0.04                                                              | 0.19 × 0.11 × 0.08                                                              | 0.22 × 0.15 × 0.09                               |
| crystal system                                | triclinic                                                                       | orthorhombic                                                                                   | orthorhombic                                                                    | orthorhombic                                                                    | monoclinic                                       |
| space group                                   | <i>P</i> -1                                                                     | <i>Pca</i> 2 <sub>1</sub>                                                                      | <i>P</i> 2 <sub>1</sub> 2 <sub>1</sub>                                          | <i>P</i> 2 <sub>1</sub> 2 <sub>1</sub>                                          | <i>P</i> 2 <sub>1</sub> / <i>c</i>               |
| <i>a</i> , Å                                  | 9.7165(3)                                                                       | 20.3247(6)                                                                                     | 8.6581(9)                                                                       | 8.6475(3)                                                                       | 11.892(1)                                        |
| <i>b</i> , Å                                  | 11.7105(4)                                                                      | 10.1709(3)                                                                                     | 17.404(2)                                                                       | 17.3751(7)                                                                      | 22.114(3)                                        |
| <i>c</i> , Å                                  | 14.6358(5)                                                                      | 23.0532(6)                                                                                     | 22.735(3)                                                                       | 22.7043(10)                                                                     | 13.276(2)                                        |
| <i>α</i> , deg                                | 87.102(1)                                                                       | 90                                                                                             | 90                                                                              | 90                                                                              | 90                                               |
| <i>β</i> , deg                                | 77.839(1)                                                                       | 90                                                                                             | 90                                                                              | 90                                                                              | 115.138(5)                                       |
| <i>γ</i> , deg                                | 73.501(1)                                                                       | 90                                                                                             | 90                                                                              | 90                                                                              | 90                                               |
| <i>V</i> , Å <sup>3</sup>                     | 1560.86(9)                                                                      | 4765.6(2)                                                                                      | 3425.8(7)                                                                       | 3411.3(2)                                                                       | 3160.7(6)                                        |
| <i>Z</i>                                      | 2                                                                               | 8                                                                                              | 4                                                                               | 4                                                                               | 4                                                |
| <i>d</i> <sub>calc</sub> , g cm <sup>-3</sup> | 1.523                                                                           | 1.833                                                                                          | 1.543                                                                           | 1.549                                                                           | 1.101                                            |
| <i>μ</i> , mm <sup>-1</sup>                   | 4.627                                                                           | 6.073                                                                                          | 4.223                                                                           | 4.241                                                                           | 0.066                                            |
| <i>F</i> (000)                                | 720                                                                             | 2544                                                                                           | 1600                                                                            | 1600                                                                            | 1136                                             |
| <i>T</i> <sub>min</sub>                       | 0.6046                                                                          | 0.7457                                                                                         | 0.5833                                                                          | 0.5786                                                                          | 0.9856                                           |
| <i>T</i> <sub>max</sub>                       | 0.7457                                                                          | 0.5008                                                                                         | 0.7457                                                                          | 0.7457                                                                          | 0.9941                                           |
| θ range (°)                                   | 2.233–28.563                                                                    | 2.407–32.191                                                                                   | 2.140–28.284                                                                    | 2.143–28.374                                                                    | 1.89–28.35                                       |
| No. of reflns Measured                        | 55244                                                                           | 192681                                                                                         | 115527                                                                          | 115054                                                                          | 138629                                           |
| No. of reflns Unique                          | 7839                                                                            | 11870                                                                                          | 8492                                                                            | 8505                                                                            | 7882                                             |
| No. of reflns with <i>I</i> > 2σ( <i>I</i> )  | 7251                                                                            | 10803                                                                                          | 7028                                                                            | 7108                                                                            | 4564                                             |
| No. of params Refined                         | 327                                                                             | 559                                                                                            | 430                                                                             | 338                                                                             | 360                                              |
| Max., in Δρ (e Å <sup>-3</sup> )              | 0.726                                                                           | 1.270                                                                                          | 0.881                                                                           | 0.859                                                                           | 0.172                                            |
| Min., in Δρ (e Å <sup>-3</sup> )              | -0.572                                                                          | -0.969                                                                                         | -0.503                                                                          | -0.496                                                                          | -0.196                                           |
| Absolute structure parameter                  |                                                                                 | 0.004(2)                                                                                       | -0.004(4)                                                                       | -0.007(3)                                                                       |                                                  |
| <i>GOF</i> on <i>F</i> <sup>2</sup>           | 1.100                                                                           | 1.081                                                                                          | 1.043                                                                           | 1.066                                                                           | 1.023                                            |
| <i>R</i> 1 <sup>a</sup>                       | 0.0180                                                                          | 0.0223                                                                                         | 0.0334                                                                          | 0.0317                                                                          | 0.0549                                           |
| <i>wR</i> 2 <sup>b</sup>                      | 0.0386                                                                          | 0.0491                                                                                         | 0.0527                                                                          | 0.0470                                                                          | 0.1135                                           |

$$^a R = \sum[|F_o| - |F_c|] / \sum|F_o|, \quad ^b wR2 = \{\sum[w(F_o^2 - F_c^2)^2] / \sum[w(F_o^2)^2]\}^{1/2}$$

**Table-SM2.** Total energies of each compound and relative reaction energies ( $\Delta E$ ) calculated by the wB97XD-DFT method with Lanl2DZ basis sets. The alkyl group of R-NCO here is  $C_6H_5-CH_2-$ . (Hartree = 627.51 kcal/mol)

| (Molecule No.) | Metal                           | wB97XD     |            |
|----------------|---------------------------------|------------|------------|
|                |                                 | (Hartree)  | (kcal/mol) |
| (A)            |                                 | -438.6782  |            |
| (B)            | M = Pd                          | -688.3420  |            |
|                | M = Pt                          | -680.7630  |            |
| (C)            |                                 | -309.3591  |            |
| (D)            | M = Pd                          | -817.6489  |            |
|                | $\Delta E_{\text{Step-1}}$ (Pd) | 0.0121     | 7.6        |
|                | M = Pt                          | -810.0692  |            |
|                | $\Delta E_{\text{Step-1}}$ (Pt) | 0.0128     | 8.0        |
| (E)            | M = Pd                          | -1256.4077 |            |
|                | $\Delta E_{\text{Step-2}}$ (Pd) | -0.0684    | -42.9      |
|                | M = Pt                          | -1248.8497 |            |
|                | $\Delta E_{\text{Step-2}}$ (Pt) | -0.0895    | -56.1      |
| (F)            | M = Pd                          | -1695.1246 |            |
|                | $\Delta E_{\text{Step-3}}$ (Pd) | -0.1072    | -67.3      |
|                | M = Pt                          | -1687.5671 |            |
|                | $\Delta E_{\text{Step-3}}$ (Pt) | -0.1287    | -80.8      |
| (G)            |                                 | -1316.1717 |            |
|                | $\Delta E_{\text{Step-4}}$      | -0.1372    | -86.1      |
| (H)            |                                 | -126.0754  |            |
| (I)            | M = Pd                          | -4521.4473 |            |
|                | $\Delta E_{\text{Tetra}}$ (Pd)  | -0.0979    | -61.5      |
|                | M = Pt                          | -4491.2433 |            |
|                | $\Delta E_{\text{Tetra}}$ (Pt)  | -0.1460    | -91.6      |

**Table-SM3.** The Cartesian coordinates of the optimized structure of (B), (D), and (F) for M = Pd and Pt complexes by the wB97XD/Lan12DZ methodology.

| B = $[(CH_3)_3P]_2M \cdots C_6H_5CHCH_2$ , with M = Pd in Standard orientation: |               |             |                         |           |           |  |
|---------------------------------------------------------------------------------|---------------|-------------|-------------------------|-----------|-----------|--|
| Center Number                                                                   | Atomic Number | Atomic Type | Coordinates (Angstroms) |           |           |  |
|                                                                                 |               |             | X                       | Y         | Z         |  |
| 1                                                                               | 6             | 0           | -0.108482               | -2.247872 | -1.209947 |  |
| 2                                                                               | 1             | 0           | -0.132687               | -2.974627 | -0.399918 |  |
| 3                                                                               | 6             | 0           | -1.156185               | -1.300457 | -1.378262 |  |
| 4                                                                               | 1             | 0           | -1.316057               | -0.901835 | -2.380141 |  |
| 5                                                                               | 1             | 0           | 0.459332                | -2.562099 | -2.082440 |  |
| 6                                                                               | 15            | 0           | 2.840639                | -0.536398 | 0.334704  |  |
| 7                                                                               | 15            | 0           | -0.185094               | 1.950811  | -0.057889 |  |
| 8                                                                               | 6             | 0           | 3.043043                | -0.345502 | 2.195033  |  |
| 9                                                                               | 1             | 0           | 2.444735                | -1.106709 | 2.702307  |  |
| 10                                                                              | 1             | 0           | 4.091215                | -0.447438 | 2.497092  |  |
| 11                                                                              | 1             | 0           | 2.673621                | 0.638336  | 2.497582  |  |
| 12                                                                              | 6             | 0           | 3.755622                | -2.152553 | 0.046152  |  |
| 13                                                                              | 1             | 0           | 4.756965                | -2.135948 | 0.490668  |  |
| 14                                                                              | 1             | 0           | 3.176514                | -2.971125 | 0.481390  |  |
| 15                                                                              | 1             | 0           | 3.837812                | -2.328232 | -1.029648 |  |
| 16                                                                              | 6             | 0           | 4.113935                | 0.703239  | -0.281942 |  |
| 17                                                                              | 1             | 0           | 3.775587                | 1.714248  | -0.038866 |  |
| 18                                                                              | 1             | 0           | 5.095419                | 0.529799  | 0.172955  |  |
| 19                                                                              | 1             | 0           | 4.199767                | 0.621191  | -1.368607 |  |
| 20                                                                              | 6             | 0           | 0.996991                | 3.350569  | 0.377614  |  |
| 21                                                                              | 1             | 0           | 1.679546                | 3.522965  | -0.459537 |  |
| 22                                                                              | 1             | 0           | 0.456232                | 4.277690  | 0.597288  |  |
| 23                                                                              | 1             | 0           | 1.586376                | 3.065082  | 1.254310  |  |
| 24                                                                              | 6             | 0           | -1.230009               | 2.772684  | -1.385148 |  |
| 25                                                                              | 1             | 0           | -1.606113               | 3.746601  | -1.053076 |  |
| 26                                                                              | 1             | 0           | -0.635587               | 2.901818  | -2.293287 |  |
| 27                                                                              | 1             | 0           | -2.075595               | 2.117739  | -1.610616 |  |
| 28                                                                              | 6             | 0           | -1.365195               | 2.008669  | 1.401887  |  |
| 29                                                                              | 1             | 0           | -1.742421               | 3.023700  | 1.569087  |  |
| 30                                                                              | 1             | 0           | -2.204221               | 1.335410  | 1.205684  |  |
| 31                                                                              | 1             | 0           | -0.850240               | 1.658449  | 2.300356  |  |
| 32                                                                              | 6             | 0           | -2.314363               | -1.130096 | -0.463635 |  |
| 33                                                                              | 6             | 0           | -3.434562               | -0.385219 | -0.894154 |  |
| 34                                                                              | 6             | 0           | -2.340303               | -1.654199 | 0.849630  |  |
| 35                                                                              | 6             | 0           | -4.529475               | -0.157969 | -0.048787 |  |
| 36                                                                              | 1             | 0           | -3.446580               | 0.010585  | -1.907080 |  |
| 37                                                                              | 6             | 0           | -3.434204               | -1.431873 | 1.693827  |  |
| 38                                                                              | 1             | 0           | -1.489494               | -2.220282 | 1.215115  |  |
| 39                                                                              | 6             | 0           | -4.536225               | -0.677474 | 1.254739  |  |
| 40                                                                              | 1             | 0           | -5.376857               | 0.417976  | -0.408327 |  |
| 41                                                                              | 1             | 0           | -3.427734               | -1.842267 | 2.699163  |  |
| 42                                                                              | 1             | 0           | -5.381701               | -0.504596 | 1.912369  |  |
| 43                                                                              | 46            | 0           | 0.583814                | -0.324224 | -0.514307 |  |

  

| B = $[(CH_3)_3P]_2M \cdots C_6H_5CHCH_2$ , with M = Pt in Standard orientation: |               |             |                         |   |   |  |
|---------------------------------------------------------------------------------|---------------|-------------|-------------------------|---|---|--|
| Center Number                                                                   | Atomic Number | Atomic Type | Coordinates (Angstroms) |   |   |  |
|                                                                                 |               |             | X                       | Y | Z |  |

|    |    |   |           |           |           |
|----|----|---|-----------|-----------|-----------|
| 1  | 6  | 0 | -0.215871 | -2.184306 | -1.062087 |
| 2  | 1  | 0 | -0.325614 | -2.928214 | -0.272995 |
| 3  | 6  | 0 | -1.249714 | -1.173833 | -1.258831 |
| 4  | 1  | 0 | -1.416816 | -0.842315 | -2.284761 |
| 5  | 1  | 0 | 0.287189  | -2.569265 | -1.947913 |
| 6  | 15 | 0 | 2.711530  | -0.499747 | 0.439113  |
| 7  | 15 | 0 | -0.148696 | 1.977247  | -0.005038 |
| 8  | 6  | 0 | 2.914234  | -0.245798 | 2.287921  |
| 9  | 1  | 0 | 2.281852  | -0.962903 | 2.817001  |
| 10 | 1  | 0 | 3.956460  | -0.380148 | 2.596329  |
| 11 | 1  | 0 | 2.584173  | 0.762953  | 2.550481  |
| 12 | 6  | 0 | 3.543542  | -2.162959 | 0.198987  |
| 13 | 1  | 0 | 4.549040  | -2.177588 | 0.633080  |
| 14 | 1  | 0 | 2.927514  | -2.934404 | 0.667388  |
| 15 | 1  | 0 | 3.601211  | -2.376535 | -0.871166 |
| 16 | 6  | 0 | 4.013549  | 0.667715  | -0.243185 |
| 17 | 1  | 0 | 3.721930  | 1.697642  | -0.021528 |
| 18 | 1  | 0 | 4.997100  | 0.465207  | 0.193827  |
| 19 | 1  | 0 | 4.065409  | 0.548548  | -1.328250 |
| 20 | 6  | 0 | 1.088266  | 3.331178  | 0.408024  |
| 21 | 1  | 0 | 1.782595  | 3.451618  | -0.428245 |
| 22 | 1  | 0 | 0.584038  | 4.284456  | 0.598616  |
| 23 | 1  | 0 | 1.656027  | 3.041680  | 1.297260  |
| 24 | 6  | 0 | -1.128500 | 2.777958  | -1.387801 |
| 25 | 1  | 0 | -1.463261 | 3.782916  | -1.109686 |
| 26 | 1  | 0 | -0.512009 | 2.831194  | -2.288354 |
| 27 | 1  | 0 | -1.997817 | 2.148836  | -1.595065 |
| 28 | 6  | 0 | -1.352025 | 2.104549  | 1.426234  |
| 29 | 1  | 0 | -1.700662 | 3.134032  | 1.561099  |
| 30 | 1  | 0 | -2.204784 | 1.450159  | 1.224914  |
| 31 | 1  | 0 | -0.864906 | 1.758317  | 2.341284  |
| 32 | 6  | 0 | -2.449946 | -1.014177 | -0.390882 |
| 33 | 6  | 0 | -3.554227 | -0.271986 | -0.863776 |
| 34 | 6  | 0 | -2.520884 | -1.529177 | 0.923841  |
| 35 | 6  | 0 | -4.676437 | -0.036043 | -0.056773 |
| 36 | 1  | 0 | -3.531037 | 0.117321  | -1.879108 |
| 37 | 6  | 0 | -3.642244 | -1.299624 | 1.729791  |
| 38 | 1  | 0 | -1.682006 | -2.091847 | 1.320812  |
| 39 | 6  | 0 | -4.727382 | -0.546196 | 1.249327  |
| 40 | 1  | 0 | -5.510451 | 0.538715  | -0.448395 |
| 41 | 1  | 0 | -3.670260 | -1.703719 | 2.737404  |
| 42 | 1  | 0 | -5.593969 | -0.367206 | 1.877371  |
| 43 | 78 | 0 | 0.497210  | -0.299305 | -0.413042 |

-----  
**D** =  $[(CH_3)_3P]_2M \cdots C_6H_5CH_2NCO$  with M = Pd in Standard orientation:  
 -----

| Center Number | Atomic Number | Atomic Type | Coordinates (Angstroms) |           |           |
|---------------|---------------|-------------|-------------------------|-----------|-----------|
|               |               |             | X                       | Y         | Z         |
| 1             | 15            | 0           | 3.106560                | -0.046129 | 0.212332  |
| 2             | 15            | 0           | -0.298025               | 2.026964  | -0.281695 |
| 3             | 6             | 0           | 4.017610                | 1.588671  | 0.352939  |
| 4             | 1             | 0           | 3.608446                | 2.162071  | 1.189511  |
| 5             | 1             | 0           | 5.088905                | 1.430529  | 0.515625  |
| 6             | 1             | 0           | 3.874816                | 2.162250  | -0.567061 |
| 7             | 6             | 0           | 3.651923                | -0.954939 | 1.755878  |
| 8             | 1             | 0           | 4.743761                | -0.975291 | 1.840001  |

|    |    |   |           |           |           |
|----|----|---|-----------|-----------|-----------|
| 9  | 1  | 0 | 3.226132  | -0.474618 | 2.640249  |
| 10 | 1  | 0 | 3.267904  | -1.976380 | 1.689693  |
| 11 | 6  | 0 | 4.083739  | -0.946877 | -1.106596 |
| 12 | 1  | 0 | 3.934717  | -0.462212 | -2.074550 |
| 13 | 1  | 0 | 5.152179  | -0.965273 | -0.866373 |
| 14 | 1  | 0 | 3.699814  | -1.969013 | -1.161138 |
| 15 | 6  | 0 | 0.688080  | 3.461049  | -0.993001 |
| 16 | 1  | 0 | 0.995741  | 3.217121  | -2.013413 |
| 17 | 1  | 0 | 0.097699  | 4.383682  | -1.005602 |
| 18 | 1  | 0 | 1.586170  | 3.616462  | -0.388564 |
| 19 | 6  | 0 | -1.876688 | 2.126862  | -1.292292 |
| 20 | 1  | 0 | -2.291741 | 3.140673  | -1.284114 |
| 21 | 1  | 0 | -1.666485 | 1.828079  | -2.322534 |
| 22 | 1  | 0 | -2.609193 | 1.430137  | -0.875873 |
| 23 | 6  | 0 | -0.869741 | 2.759531  | 1.350385  |
| 24 | 1  | 0 | -1.335210 | 3.740159  | 1.203442  |
| 25 | 1  | 0 | -1.597147 | 2.081261  | 1.802906  |
| 26 | 1  | 0 | -0.016744 | 2.859762  | 2.026611  |
| 27 | 7  | 0 | -0.518127 | -1.870825 | -0.349420 |
| 28 | 6  | 0 | 0.674568  | -2.282325 | -0.169550 |
| 29 | 8  | 0 | 1.470606  | -3.231264 | -0.043966 |
| 30 | 6  | 0 | -1.845295 | -2.390151 | -0.588135 |
| 31 | 1  | 0 | -1.987514 | -2.572667 | -1.661216 |
| 32 | 1  | 0 | -1.954609 | -3.358396 | -0.076327 |
| 33 | 6  | 0 | -2.913061 | -1.428760 | -0.095410 |
| 34 | 6  | 0 | -4.074192 | -1.198737 | -0.850189 |
| 35 | 6  | 0 | -2.759139 | -0.767471 | 1.136544  |
| 36 | 6  | 0 | -5.070010 | -0.324205 | -0.384978 |
| 37 | 1  | 0 | -4.199742 | -1.695475 | -1.808561 |
| 38 | 6  | 0 | -3.752417 | 0.102295  | 1.606185  |
| 39 | 1  | 0 | -1.852052 | -0.929617 | 1.710392  |
| 40 | 6  | 0 | -4.912229 | 0.328903  | 0.846100  |
| 41 | 1  | 0 | -5.960491 | -0.153027 | -0.981090 |
| 42 | 1  | 0 | -3.627865 | 0.597907  | 2.564295  |
| 43 | 1  | 0 | -5.680425 | 1.003820  | 1.209022  |
| 44 | 46 | 0 | 0.760392  | -0.202862 | -0.149446 |

$\mathbf{D} = [(CH_3)_3P]_2M \cdots C_6H_5CH_2NCO$  with M = Pt in Standard orientation:

| Center Number | Atomic Number | Atomic Type | Coordinates (Angstroms) |           |           |
|---------------|---------------|-------------|-------------------------|-----------|-----------|
|               |               |             | X                       | Y         | Z         |
| 1             | 78            | 0           | 0.652688                | -0.321793 | -0.162138 |
| 2             | 15            | 0           | 2.908538                | 0.049684  | 0.330285  |
| 3             | 15            | 0           | -0.221399               | 1.957373  | -0.348207 |
| 4             | 6             | 0           | 3.368766                | 1.421996  | 1.519056  |
| 5             | 1             | 0           | 2.824351                | 1.277016  | 2.455376  |
| 6             | 1             | 0           | 4.444456                | 1.419577  | 1.721277  |
| 7             | 1             | 0           | 3.085258                | 2.389248  | 1.095107  |
| 8             | 6             | 0           | 3.695308                | -1.455610 | 1.106944  |
| 9             | 1             | 0           | 4.784771                | -1.359494 | 1.152311  |
| 10            | 1             | 0           | 3.293743                | -1.581829 | 2.115551  |
| 11            | 1             | 0           | 3.406522                | -2.336366 | 0.527579  |
| 12            | 6             | 0           | 4.005191                | 0.399304  | -1.143778 |
| 13            | 1             | 0           | 3.665616                | 1.310871  | -1.641776 |
| 14            | 1             | 0           | 5.049886                | 0.514396  | -0.837725 |
| 15            | 1             | 0           | 3.919886                | -0.432208 | -1.846872 |



|    |   |   |           |           |           |
|----|---|---|-----------|-----------|-----------|
| 16 | 6 | 0 | 0.842923  | 3.241313  | -1.210184 |
| 17 | 1 | 0 | 1.065129  | 2.896939  | -2.223520 |
| 18 | 1 | 0 | 0.332824  | 4.208902  | -1.260358 |
| 19 | 1 | 0 | 1.786001  | 3.361798  | -0.669656 |
| 20 | 6 | 0 | -1.838820 | 2.124058  | -1.276657 |
| 21 | 1 | 0 | -2.143999 | 3.172956  | -1.353137 |
| 22 | 1 | 0 | -1.723877 | 1.700607  | -2.277321 |
| 23 | 1 | 0 | -2.610481 | 1.556381  | -0.750857 |
| 24 | 6 | 0 | -0.621679 | 2.806518  | 1.273498  |
| 25 | 1 | 0 | -1.010898 | 3.816345  | 1.106900  |
| 26 | 1 | 0 | -1.372833 | 2.211508  | 1.798809  |
| 27 | 1 | 0 | 0.278700  | 2.857904  | 1.891067  |
| 28 | 7 | 0 | -0.733024 | -1.813424 | -0.445504 |
| 29 | 6 | 0 | 0.423266  | -2.362757 | -0.177043 |
| 30 | 8 | 0 | 0.995991  | -3.457875 | -0.015896 |
| 31 | 6 | 0 | -2.102160 | -2.219873 | -0.656320 |
| 32 | 1 | 0 | -2.301742 | -2.338453 | -1.729386 |
| 33 | 1 | 0 | -2.252243 | -3.204117 | -0.187752 |
| 34 | 6 | 0 | -3.081462 | -1.214985 | -0.072556 |
| 35 | 6 | 0 | -4.240733 | -0.849898 | -0.775483 |
| 36 | 6 | 0 | -2.839694 | -0.636280 | 1.187250  |
| 37 | 6 | 0 | -5.145587 | 0.078586  | -0.234710 |
| 38 | 1 | 0 | -4.434214 | -1.283130 | -1.753106 |
| 39 | 6 | 0 | -3.739914 | 0.289756  | 1.730676  |
| 40 | 1 | 0 | -1.936523 | -0.906390 | 1.725508  |
| 41 | 6 | 0 | -4.896828 | 0.653257  | 1.020412  |
| 42 | 1 | 0 | -6.035639 | 0.353216  | -0.791596 |
| 43 | 1 | 0 | -3.545744 | 0.722050  | 2.707692  |
| 44 | 1 | 0 | -5.593906 | 1.370925  | 1.440566  |

$\mathbf{F} = [(CH_3)_3P]_2M \cdots [C_6H_5CH_2NCO]_3$  with M = Pd in Standard orientation:

| Center Number | Atomic Number | Atomic Type | Coordinates (Angstroms) |           |           |
|---------------|---------------|-------------|-------------------------|-----------|-----------|
|               |               |             | X                       | Y         | Z         |
| 1             | 15            | 0           | -0.086388               | 2.091776  | 1.878743  |
| 2             | 8             | 0           | -2.319710               | -0.306381 | 1.183421  |
| 3             | 8             | 0           | -1.016162               | 1.024681  | -2.914502 |
| 4             | 7             | 0           | 0.446831                | -0.521268 | -2.049427 |
| 5             | 7             | 0           | -1.693698               | -0.093541 | -1.009120 |
| 6             | 6             | 0           | 1.244490                | 3.240243  | 2.517132  |
| 7             | 1             | 0           | 1.734174                | 2.790384  | 3.384180  |
| 8             | 1             | 0           | 0.809546                | 4.199787  | 2.812903  |
| 9             | 1             | 0           | 1.992625                | 3.407021  | 1.738651  |
| 10            | 6             | 0           | -1.246410               | 1.912010  | 3.328584  |
| 11            | 1             | 0           | -0.716554               | 1.461724  | 4.171794  |
| 12            | 1             | 0           | -2.054760               | 1.243702  | 3.022180  |
| 13            | 1             | 0           | -1.651176               | 2.884188  | 3.625710  |
| 14            | 6             | 0           | -1.046120               | 3.174812  | 0.698244  |
| 15            | 1             | 0           | -1.990835               | 2.685544  | 0.450261  |
| 16            | 1             | 0           | -0.486841               | 3.319471  | -0.228794 |
| 17            | 1             | 0           | -1.259542               | 4.146953  | 1.152788  |
| 18            | 6             | 0           | -1.396015               | -0.158967 | 0.353678  |
| 19            | 6             | 0           | -3.131336               | -0.007269 | -1.395992 |
| 20            | 1             | 0           | -3.638897               | -0.823633 | -0.877025 |
| 21            | 6             | 0           | -0.742499               | 0.180197  | -2.027072 |
| 22            | 6             | 0           | 1.415327                | -0.168782 | -3.103870 |

|    |    |   |           |           |           |
|----|----|---|-----------|-----------|-----------|
| 23 | 1  | 0 | 0.881568  | 0.394425  | -3.872774 |
| 24 | 1  | 0 | 1.772593  | -1.102396 | -3.542899 |
| 25 | 46 | 0 | 0.510466  | -0.025713 | 0.948807  |
| 26 | 15 | 0 | 2.868807  | -0.329875 | 1.673322  |
| 27 | 6  | 0 | 3.857885  | -1.230493 | 0.369687  |
| 28 | 1  | 0 | 4.813606  | -1.575648 | 0.777058  |
| 29 | 1  | 0 | 3.281042  | -2.080047 | -0.000769 |
| 30 | 1  | 0 | 4.044585  | -0.555877 | -0.469050 |
| 31 | 6  | 0 | 4.038135  | 1.058423  | 2.141866  |
| 32 | 1  | 0 | 4.077105  | 1.786086  | 1.328579  |
| 33 | 1  | 0 | 3.694910  | 1.553320  | 3.053388  |
| 34 | 1  | 0 | 5.044029  | 0.660869  | 2.310880  |
| 35 | 6  | 0 | 3.031941  | -1.463690 | 3.159776  |
| 36 | 1  | 0 | 2.582502  | -2.432188 | 2.929143  |
| 37 | 1  | 0 | 4.085154  | -1.614439 | 3.417824  |
| 38 | 1  | 0 | 2.507514  | -1.033168 | 4.016464  |
| 39 | 1  | 0 | -3.179395 | -0.185043 | -2.471369 |
| 40 | 6  | 0 | 0.690352  | -1.812834 | -1.400956 |
| 41 | 8  | 0 | 1.013347  | -2.787397 | -2.133674 |
| 42 | 7  | 0 | 0.599848  | -1.811009 | -0.065571 |
| 43 | 6  | 0 | 0.575410  | -3.126910 | 0.601917  |
| 44 | 1  | 0 | 0.771337  | -2.955915 | 1.664900  |
| 45 | 1  | 0 | 1.373326  | -3.761294 | 0.193080  |
| 46 | 6  | 0 | -0.768138 | -3.820111 | 0.437714  |
| 47 | 6  | 0 | -1.843804 | -3.484580 | 1.278633  |
| 48 | 6  | 0 | -0.965157 | -4.766049 | -0.583701 |
| 49 | 6  | 0 | -3.097875 | -4.084907 | 1.104614  |
| 50 | 1  | 0 | -1.708994 | -2.733431 | 2.051071  |
| 51 | 6  | 0 | -2.218953 | -5.371424 | -0.757124 |
| 52 | 1  | 0 | -0.143766 | -5.000129 | -1.252575 |
| 53 | 6  | 0 | -3.288251 | -5.033552 | 0.086949  |
| 54 | 1  | 0 | -3.921479 | -3.809584 | 1.755436  |
| 55 | 1  | 0 | -2.361699 | -6.097771 | -1.550929 |
| 56 | 1  | 0 | -4.258886 | -5.500476 | -0.048915 |
| 57 | 6  | 0 | 2.569901  | 0.660975  | -2.570396 |
| 58 | 6  | 0 | 3.885469  | 0.400173  | -2.985538 |
| 59 | 6  | 0 | 2.335845  | 1.732032  | -1.688174 |
| 60 | 6  | 0 | 4.952233  | 1.192015  | -2.529642 |
| 61 | 1  | 0 | 4.078303  | -0.428803 | -3.660276 |
| 62 | 6  | 0 | 3.395666  | 2.526640  | -1.234597 |
| 63 | 1  | 0 | 1.319954  | 1.945064  | -1.370052 |
| 64 | 6  | 0 | 4.710919  | 2.258621  | -1.651391 |
| 65 | 1  | 0 | 5.963624  | 0.976746  | -2.858394 |
| 66 | 1  | 0 | 3.198212  | 3.366181  | -0.573835 |
| 67 | 1  | 0 | 5.532302  | 2.877088  | -1.304224 |
| 68 | 6  | 0 | -3.776158 | 1.326656  | -1.048905 |
| 69 | 6  | 0 | -4.573016 | 1.452343  | 0.103505  |
| 70 | 6  | 0 | -3.580931 | 2.451955  | -1.871869 |
| 71 | 6  | 0 | -5.156259 | 2.684641  | 0.436521  |
| 72 | 1  | 0 | -4.711374 | 0.589865  | 0.746168  |
| 73 | 6  | 0 | -4.163832 | 3.683455  | -1.540545 |
| 74 | 1  | 0 | -2.948904 | 2.355443  | -2.747712 |
| 75 | 6  | 0 | -4.951356 | 3.804953  | -0.383896 |
| 76 | 1  | 0 | -5.767487 | 2.768373  | 1.329543  |
| 77 | 1  | 0 | -4.006033 | 4.543863  | -2.183064 |
| 78 | 1  | 0 | -5.404536 | 4.758058  | -0.129475 |

$\mathbf{F} = [(\text{CH}_3)_3\text{P}]_2\text{M}\cdots[\text{C}_6\text{H}_5\text{CH}_2\text{NCO}]_3$  with M = Pt in Standard orientation:

| Center Number | Atomic Number | Atomic Type | Coordinates (Angstroms) |           |           |
|---------------|---------------|-------------|-------------------------|-----------|-----------|
|               |               |             | X                       | Y         | Z         |
| 1             | 15            | 0           | -0.457495               | -0.643662 | -2.477948 |
| 2             | 8             | 0           | -2.442347               | 0.753671  | -0.297451 |
| 3             | 8             | 0           | -0.804949               | -2.419263 | 2.424166  |
| 4             | 7             | 0           | 0.646696                | -0.646647 | 2.293894  |
| 5             | 7             | 0           | -1.590235               | -0.485639 | 1.417153  |
| 6             | 6             | 0           | 0.676778                | -1.269361 | -3.823391 |
| 7             | 1             | 0           | 1.175540                | -0.425496 | -4.306699 |
| 8             | 1             | 0           | 0.098362                | -1.814893 | -4.574841 |
| 9             | 1             | 0           | 1.430505                | -1.933811 | -3.395142 |
| 10            | 6             | 0           | -1.649218               | 0.466326  | -3.383059 |
| 11            | 1             | 0           | -1.102554               | 1.296076  | -3.838371 |
| 12            | 1             | 0           | -2.344670               | 0.862646  | -2.638893 |
| 13            | 1             | 0           | -2.188400               | -0.090161 | -4.155492 |
| 14            | 6             | 0           | -1.476854               | -2.144942 | -2.048544 |
| 15            | 1             | 0           | -2.340369               | -1.831489 | -1.457888 |
| 16            | 1             | 0           | -0.886311               | -2.841503 | -1.449607 |
| 17            | 1             | 0           | -1.827139               | -2.644213 | -2.956610 |
| 18            | 6             | 0           | -1.421043               | 0.253511  | 0.228724  |
| 19            | 6             | 0           | -2.990000               | -0.773176 | 1.834857  |
| 20            | 1             | 0           | -3.507029               | 0.188472  | 1.870175  |
| 21            | 6             | 0           | -0.573011               | -1.242291 | 2.052840  |
| 22            | 6             | 0           | 1.698100                | -1.468784 | 2.917515  |
| 23            | 1             | 0           | 1.213459                | -2.323620 | 3.395699  |
| 24            | 1             | 0           | 2.169622                | -0.863826 | 3.695187  |
| 25            | 15            | 0           | 2.697417                | 0.996669  | -1.328806 |
| 26            | 6             | 0           | 3.865245                | 1.226639  | 0.108222  |
| 27            | 1             | 0           | 4.822598                | 1.630383  | -0.235658 |
| 28            | 1             | 0           | 3.419111                | 1.894823  | 0.845988  |
| 29            | 1             | 0           | 4.027615                | 0.256654  | 0.584450  |
| 30            | 6             | 0           | 3.693985                | -0.137451 | -2.434088 |
| 31            | 1             | 0           | 3.693260                | -1.142490 | -2.008632 |
| 32            | 1             | 0           | 3.267928                | -0.166088 | -3.438518 |
| 33            | 1             | 0           | 4.725653                | 0.222696  | -2.495894 |
| 34            | 6             | 0           | 2.815924                | 2.621817  | -2.254991 |
| 35            | 1             | 0           | 2.428930                | 3.429484  | -1.629729 |
| 36            | 1             | 0           | 3.853758                | 2.841884  | -2.523883 |
| 37            | 1             | 0           | 2.209159                | 2.568478  | -3.162703 |
| 38            | 1             | 0           | -2.940020               | -1.190985 | 2.841845  |
| 39            | 6             | 0           | 0.871053                | 0.795460  | 2.361950  |
| 40            | 8             | 0           | 1.135522                | 1.301227  | 3.485835  |
| 41            | 7             | 0           | 0.825182                | 1.435268  | 1.183503  |
| 42            | 6             | 0           | 0.815885                | 2.909145  | 1.218137  |
| 43            | 1             | 0           | 1.482323                | 3.285661  | 0.432669  |
| 44            | 1             | 0           | 1.208317                | 3.233598  | 2.187625  |
| 45            | 6             | 0           | -0.590146               | 3.437523  | 0.999153  |
| 46            | 6             | 0           | -0.979104               | 3.972285  | -0.237227 |
| 47            | 6             | 0           | -1.543604               | 3.313452  | 2.024995  |
| 48            | 6             | 0           | -2.303680               | 4.379524  | -0.453205 |
| 49            | 1             | 0           | -0.249896               | 4.051152  | -1.040638 |
| 50            | 6             | 0           | -2.867255               | 3.716058  | 1.812238  |
| 51            | 1             | 0           | -1.243137               | 2.889115  | 2.979166  |
| 52            | 6             | 0           | -3.251120               | 4.250773  | 0.571419  |

|    |    |   |           |           |           |
|----|----|---|-----------|-----------|-----------|
| 53 | 1  | 0 | -2.597089 | 4.783375  | -1.417090 |
| 54 | 1  | 0 | -3.598660 | 3.612098  | 2.607574  |
| 55 | 1  | 0 | -4.279079 | 4.556464  | 0.404775  |
| 56 | 6  | 0 | 2.719856  | -1.961739 | 1.907672  |
| 57 | 6  | 0 | 4.092878  | -1.904860 | 2.193831  |
| 58 | 6  | 0 | 2.301377  | -2.531072 | 0.690091  |
| 59 | 6  | 0 | 5.037407  | -2.408530 | 1.283559  |
| 60 | 1  | 0 | 4.426709  | -1.463812 | 3.128847  |
| 61 | 6  | 0 | 3.238823  | -3.039856 | -0.216320 |
| 62 | 1  | 0 | 1.241137  | -2.585551 | 0.464684  |
| 63 | 6  | 0 | 4.612892  | -2.979646 | 0.075424  |
| 64 | 1  | 0 | 6.095399  | -2.358218 | 1.519496  |
| 65 | 1  | 0 | 2.900757  | -3.498016 | -1.141481 |
| 66 | 1  | 0 | 5.339351  | -3.379837 | -0.624620 |
| 67 | 6  | 0 | -3.723091 | -1.727843 | 0.902335  |
| 68 | 6  | 0 | -4.695971 | -1.241638 | 0.011023  |
| 69 | 6  | 0 | -3.435940 | -3.105852 | 0.916423  |
| 70 | 6  | 0 | -5.367101 | -2.114481 | -0.858918 |
| 71 | 1  | 0 | -4.901719 | -0.177256 | -0.016529 |
| 72 | 6  | 0 | -4.104115 | -3.978853 | 0.045681  |
| 73 | 1  | 0 | -2.674774 | -3.473009 | 1.596323  |
| 74 | 6  | 0 | -5.070713 | -3.486554 | -0.846349 |
| 75 | 1  | 0 | -6.114081 | -1.725207 | -1.543531 |
| 76 | 1  | 0 | -3.874710 | -5.039655 | 0.066556  |
| 77 | 1  | 0 | -5.590092 | -4.163509 | -1.517658 |
| 78 | 78 | 0 | 0.420060  | 0.462500  | -0.573229 |

---

**Figure 1S.**  $^1\text{H}$ ,  $^{13}\text{C}\{^1\text{H}\}$  and  $^{31}\text{P}\{^1\text{H}\}$ -NMR spectra of *cis*-[Pd{-N(Ar)C(O)N(Ar)C(O)-}(PR<sub>3</sub>)<sub>2</sub> (PR<sub>3</sub> = PMe<sub>3</sub>, Ar = 1-naphthyl), **1** in CDCl<sub>3</sub>.

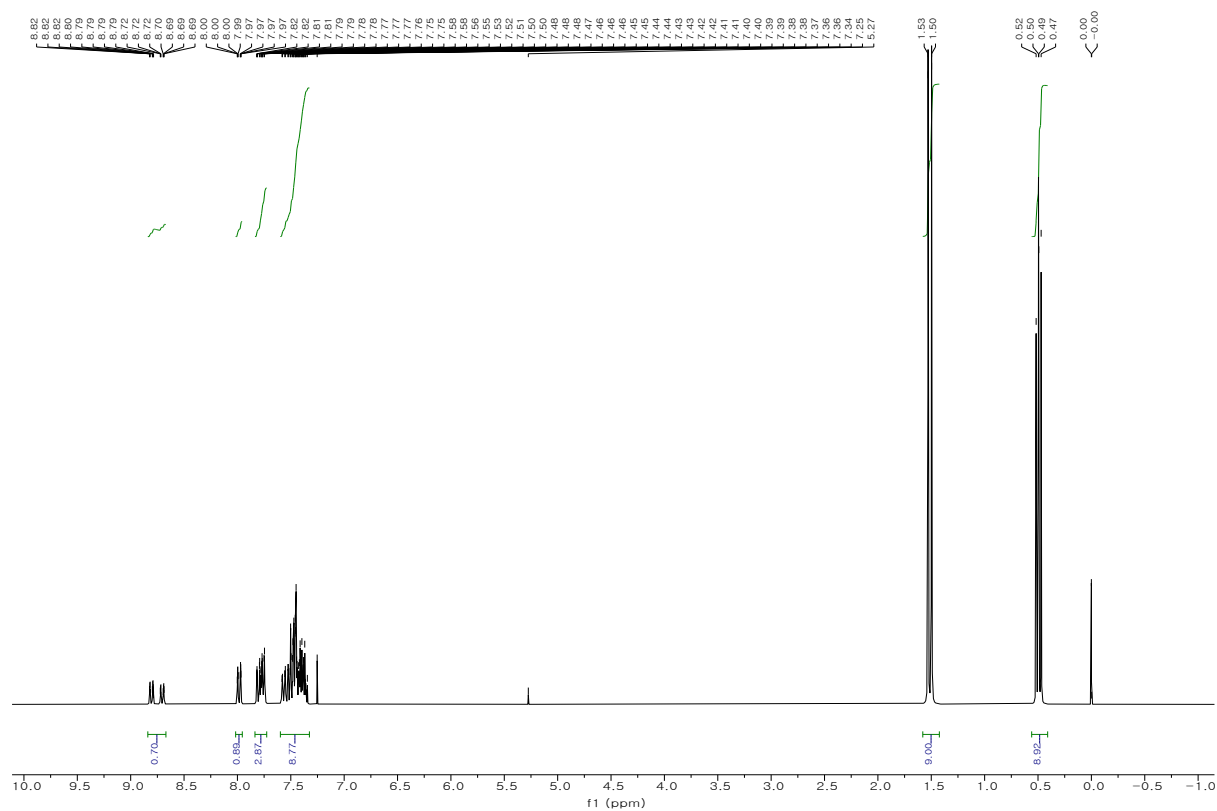

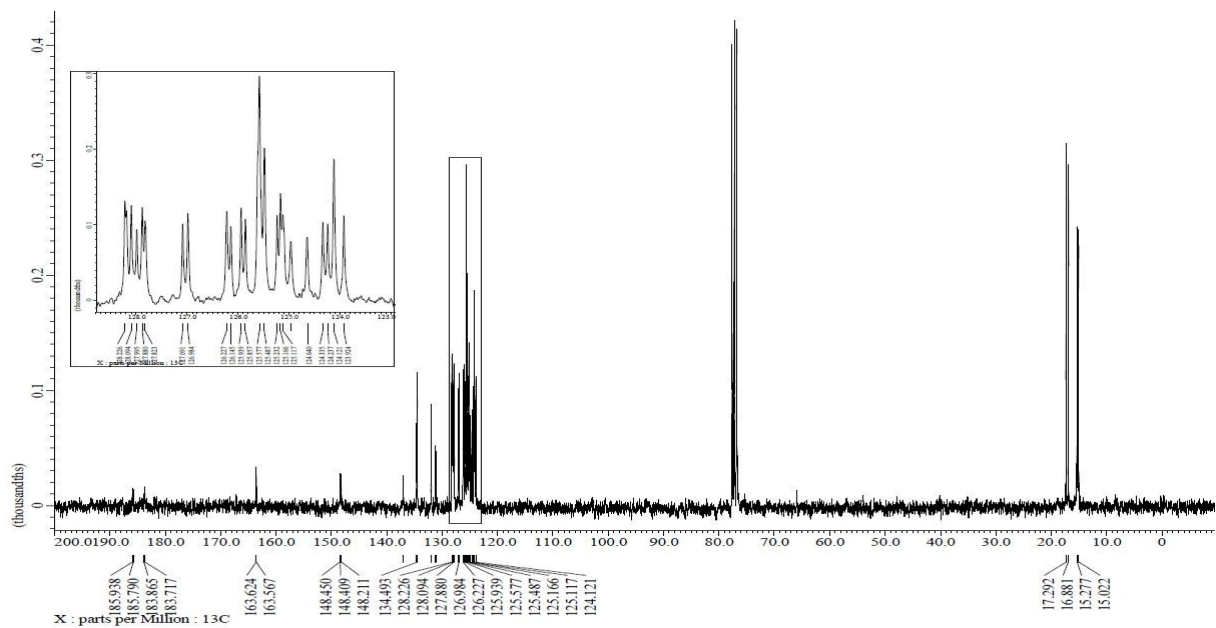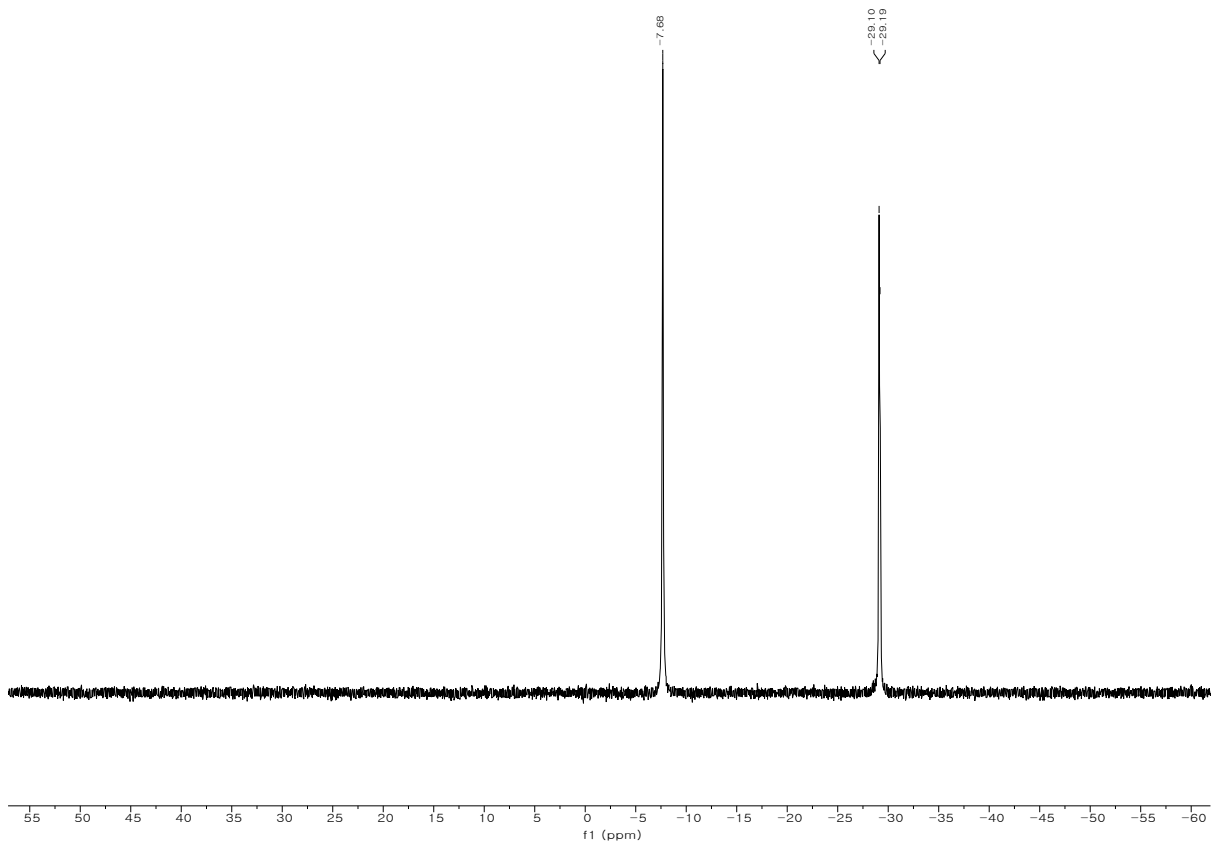

**Figure 2S.**  $^1\text{H}$ ,  $^{13}\text{C}\{^1\text{H}\}$  and  $^{31}\text{P}\{^1\text{H}\}$ -NMR spectra of *cis*-[Pd{-N(Ar)C(O)N(Ar)C(O)-}(PR<sub>3</sub>)<sub>2</sub>] (PR<sub>3</sub> = PMe<sub>3</sub>, Ar = 4-phenoxyphenyl), **2** in CDCl<sub>3</sub>.

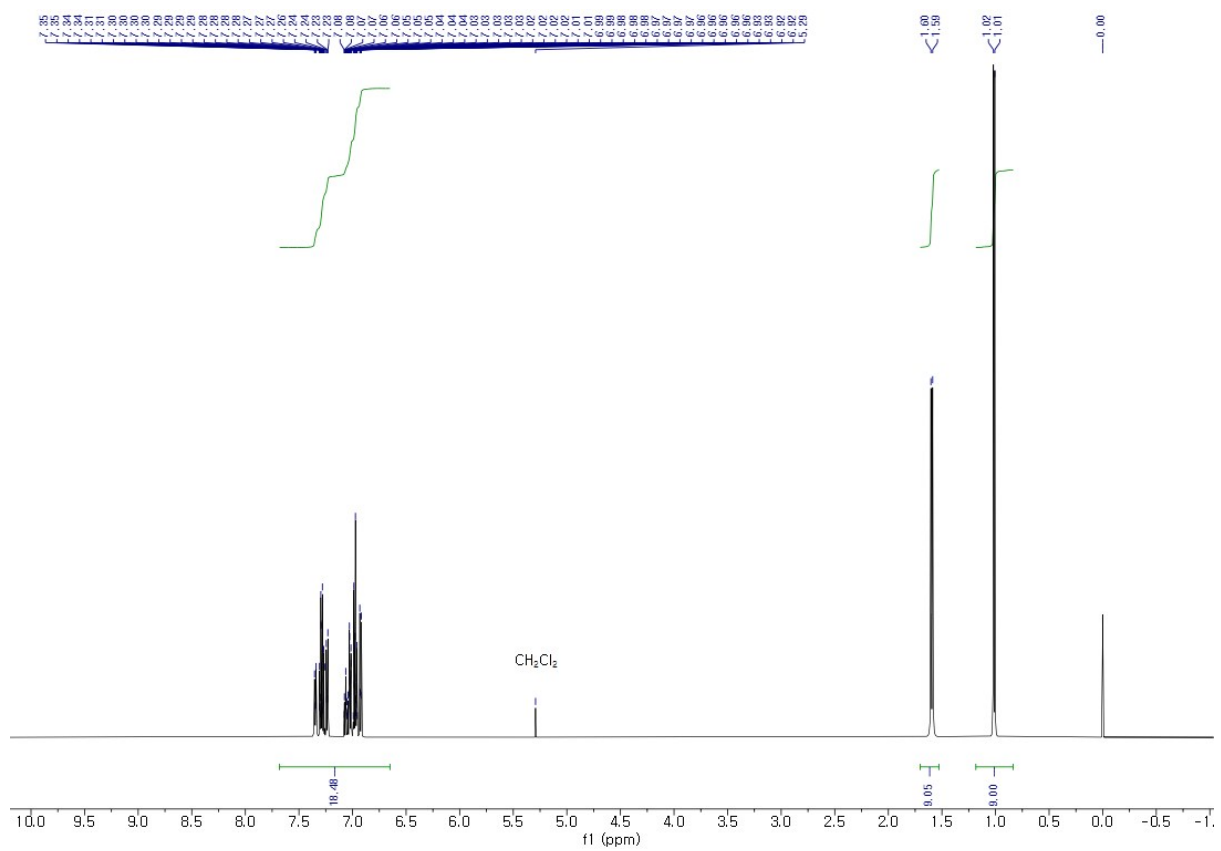

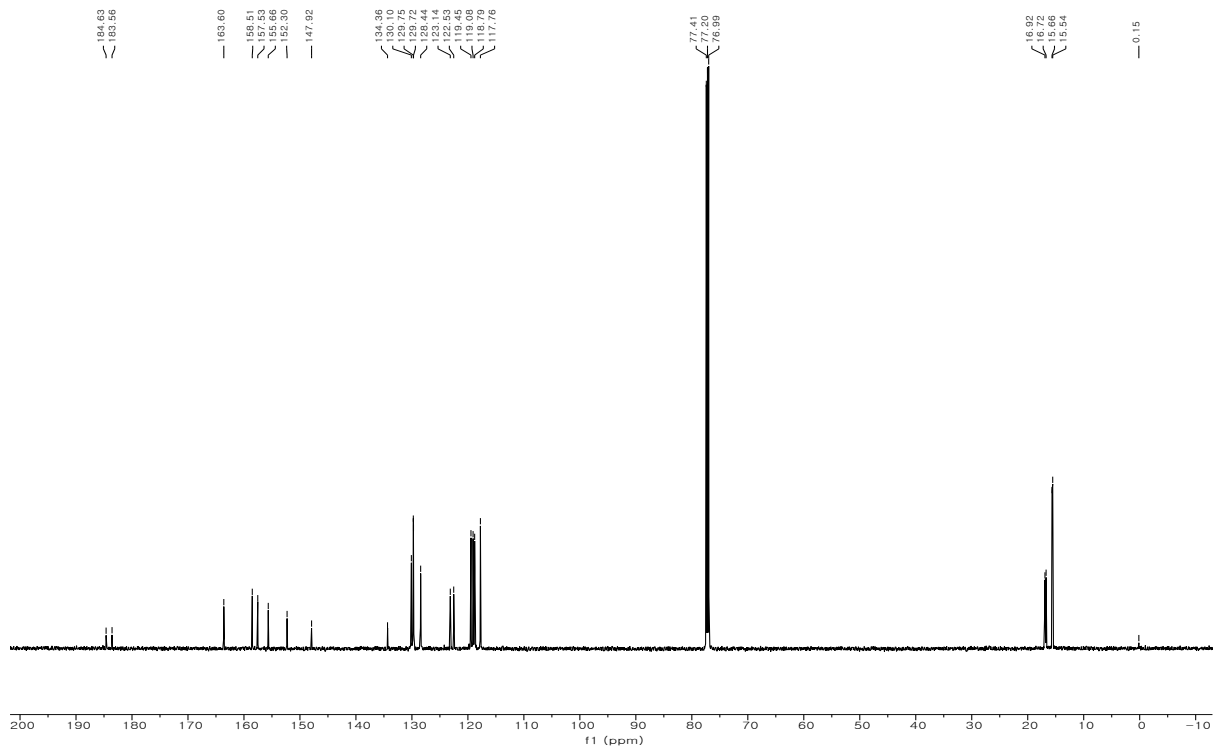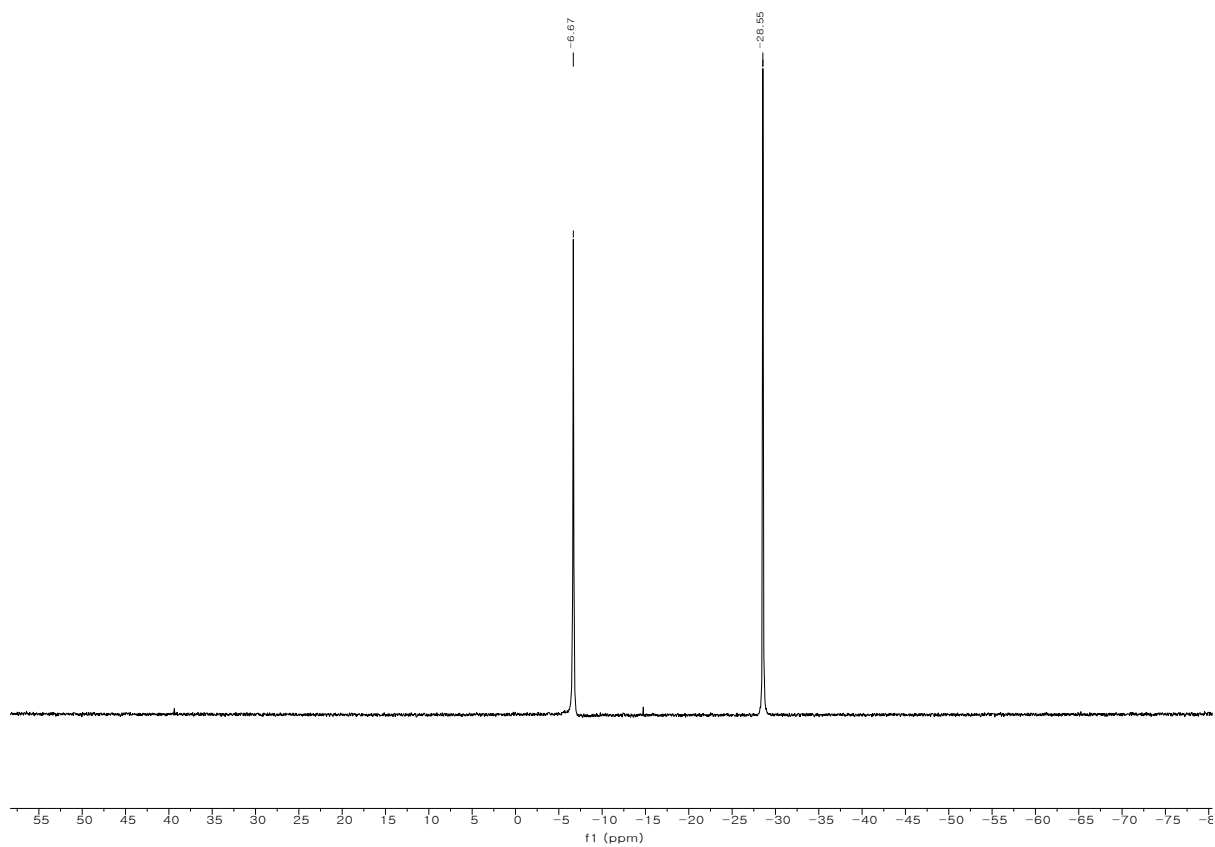



**Figure 3S.**  $^1\text{H}$ ,  $^{13}\text{C}\{^1\text{H}\}$  and  $^{31}\text{P}\{^1\text{H}\}$ -NMR spectra of  $[\text{Pd}(\text{PMe}_3)\{-\text{C}(\text{O})\text{N}(\text{R})\text{C}(\text{O})\text{N}(\text{R})-\}]_4$  (R = 3-methylbenzyl), **3** in  $\text{CDCl}_3$ .

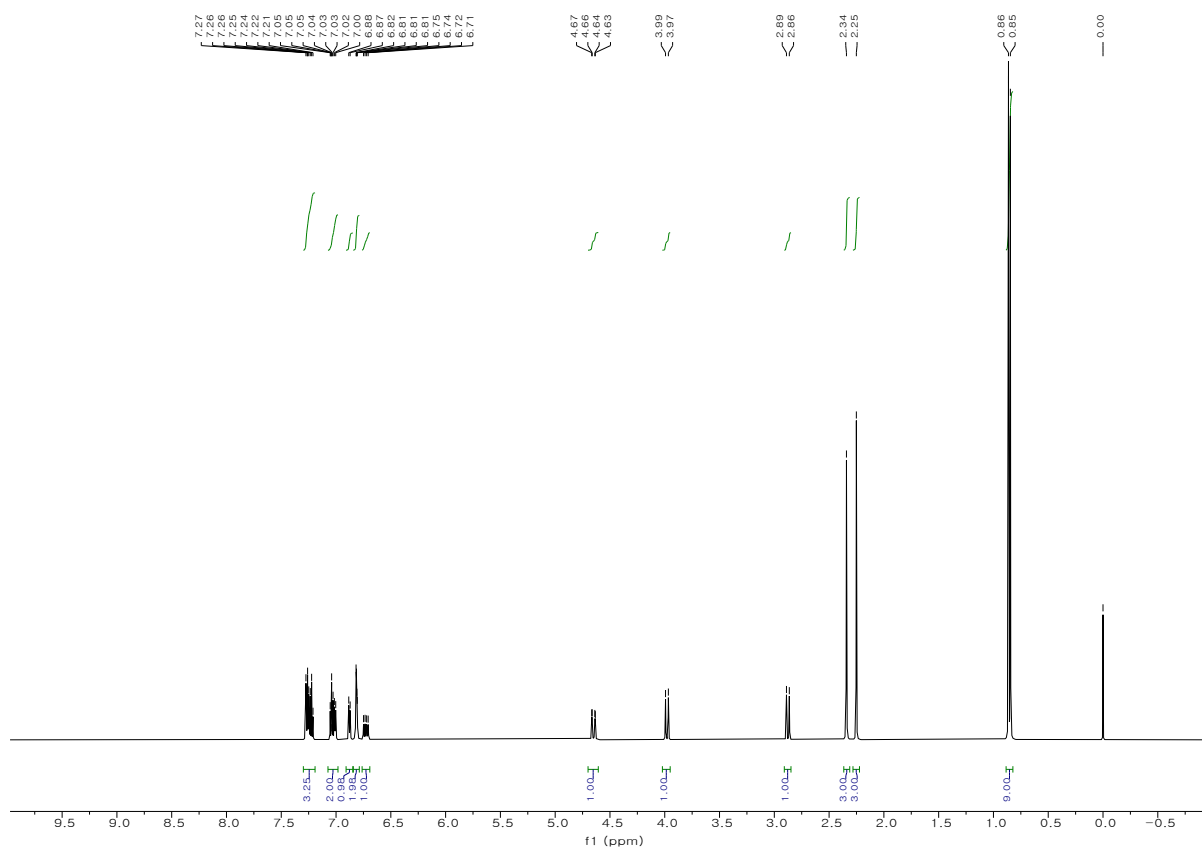

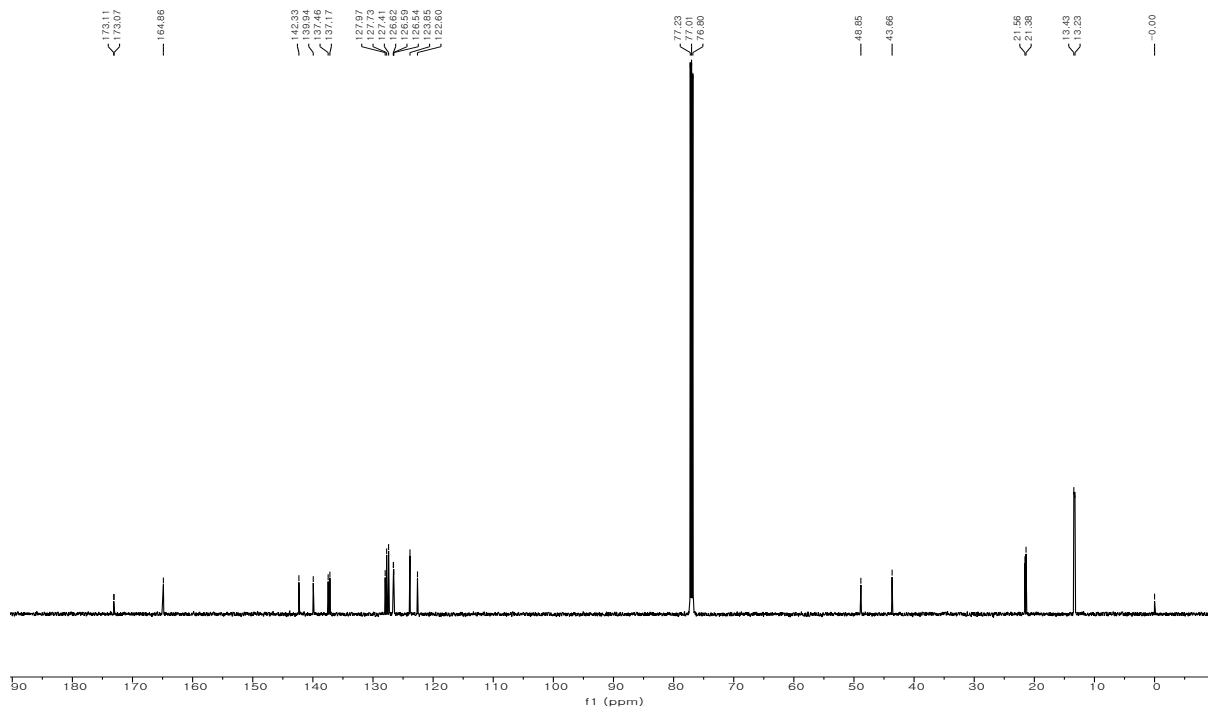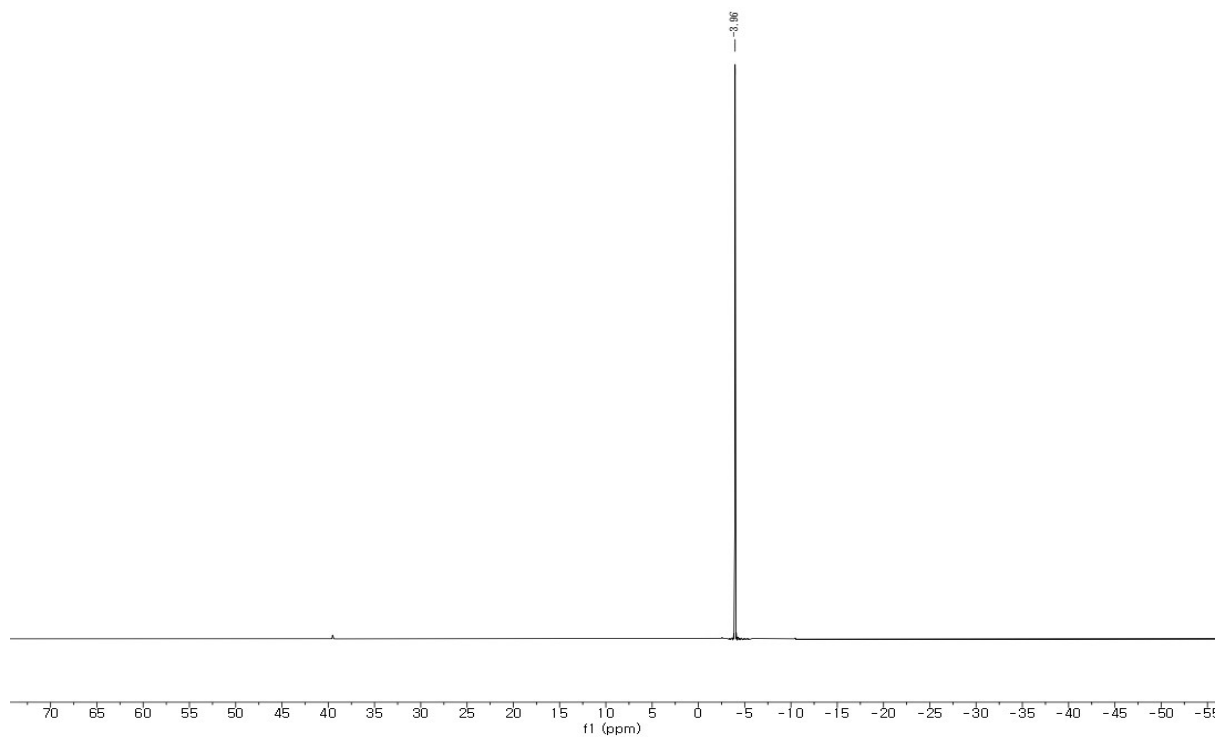

**Figure 4S.**  $^1\text{H}$ ,  $^{13}\text{C}\{^1\text{H}\}$  and  $^{31}\text{P}\{^1\text{H}\}$ -NMR spectra of  $[\text{Pd}(\text{PMe}_3)\{-\text{C}(\text{O})\text{N}(\text{R})\text{C}(\text{O})\text{N}(\text{R})-\}]_4$  (R = 4-methylbenzyl), **4** in  $\text{CDCl}_3$ .

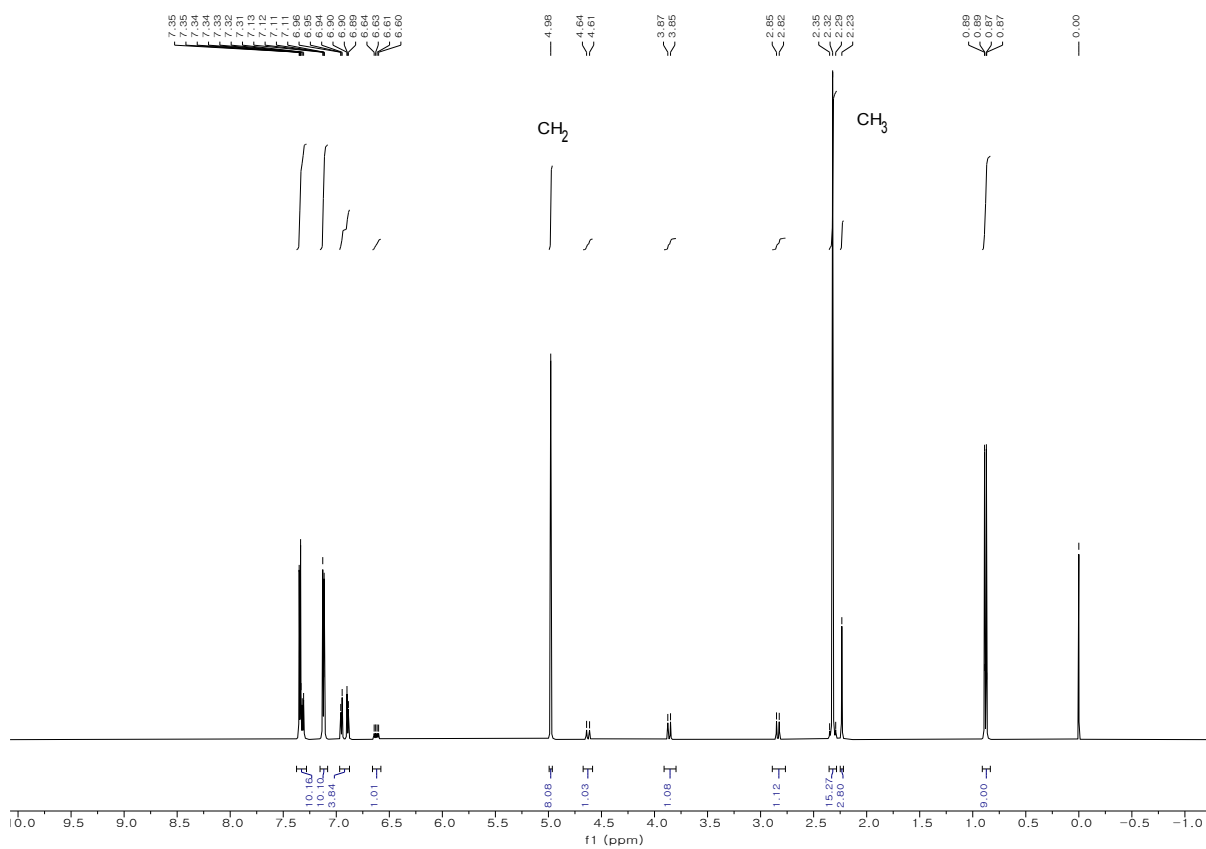

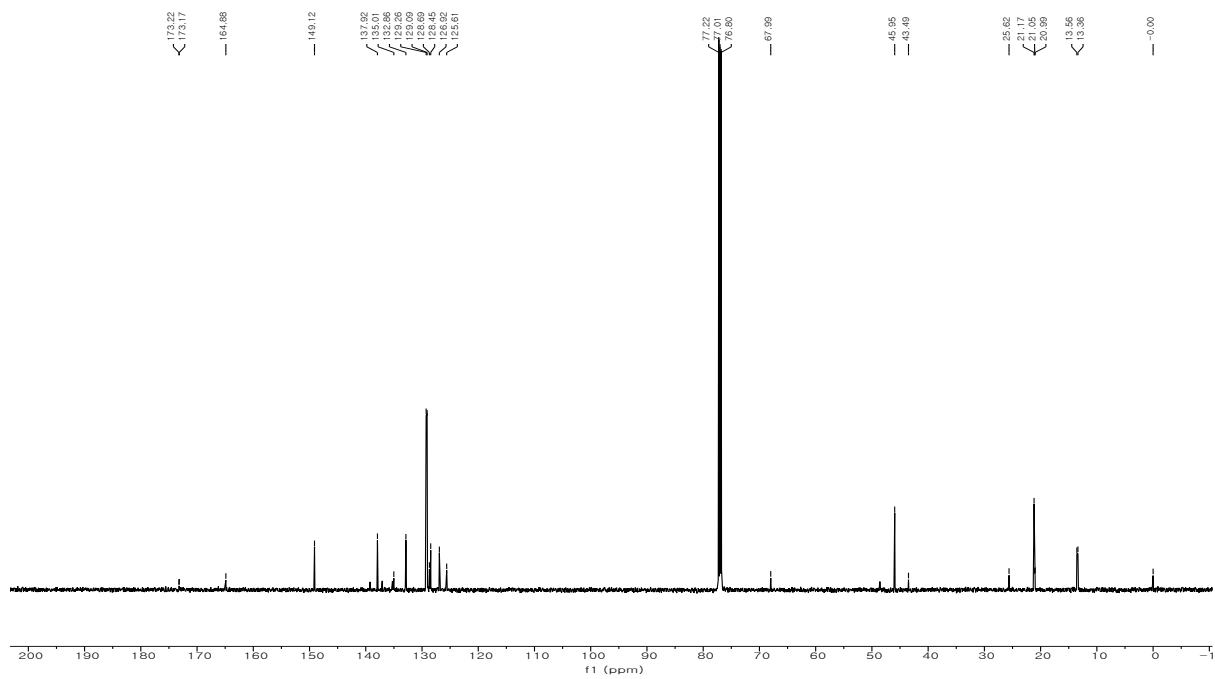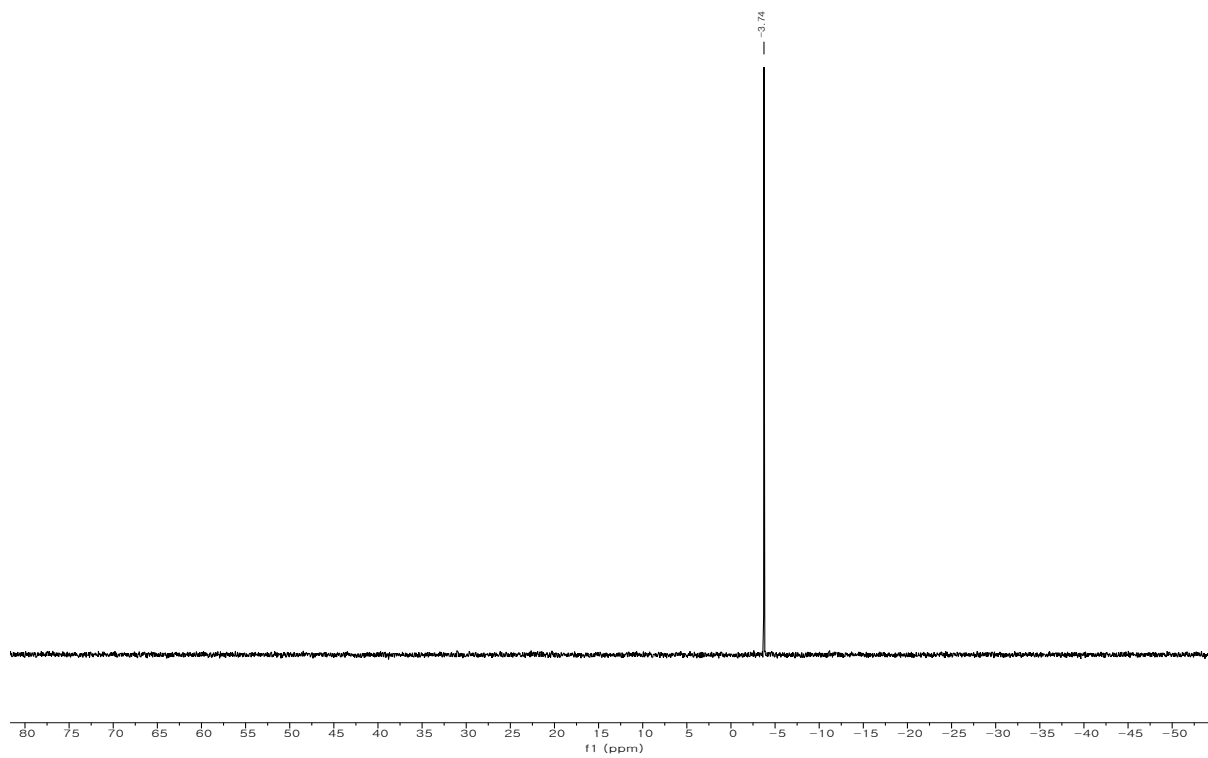

**Figure S5.**  $^1\text{H}$ ,  $^{13}\text{C}\{^1\text{H}\}$  and  $^{31}\text{P}\{^1\text{H}\}$ -NMR spectra of  $[\text{Pd}(\text{PMe}_3)\{-\text{C}(\text{O})\text{N}(\text{R})\text{C}(\text{O})\text{N}(\text{R})-\}]_4$  (R = 4-phenoxybenzyl), **5** in  $\text{CDCl}_3$ .

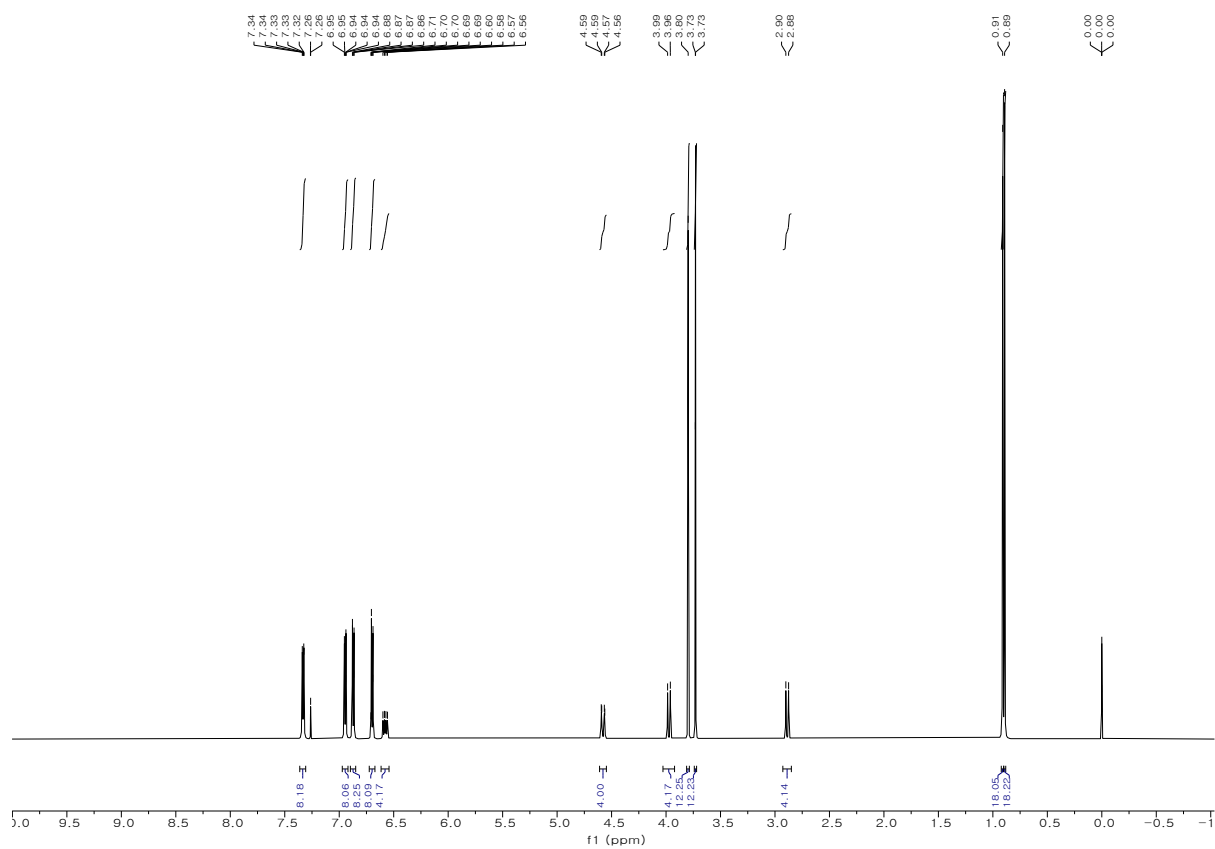

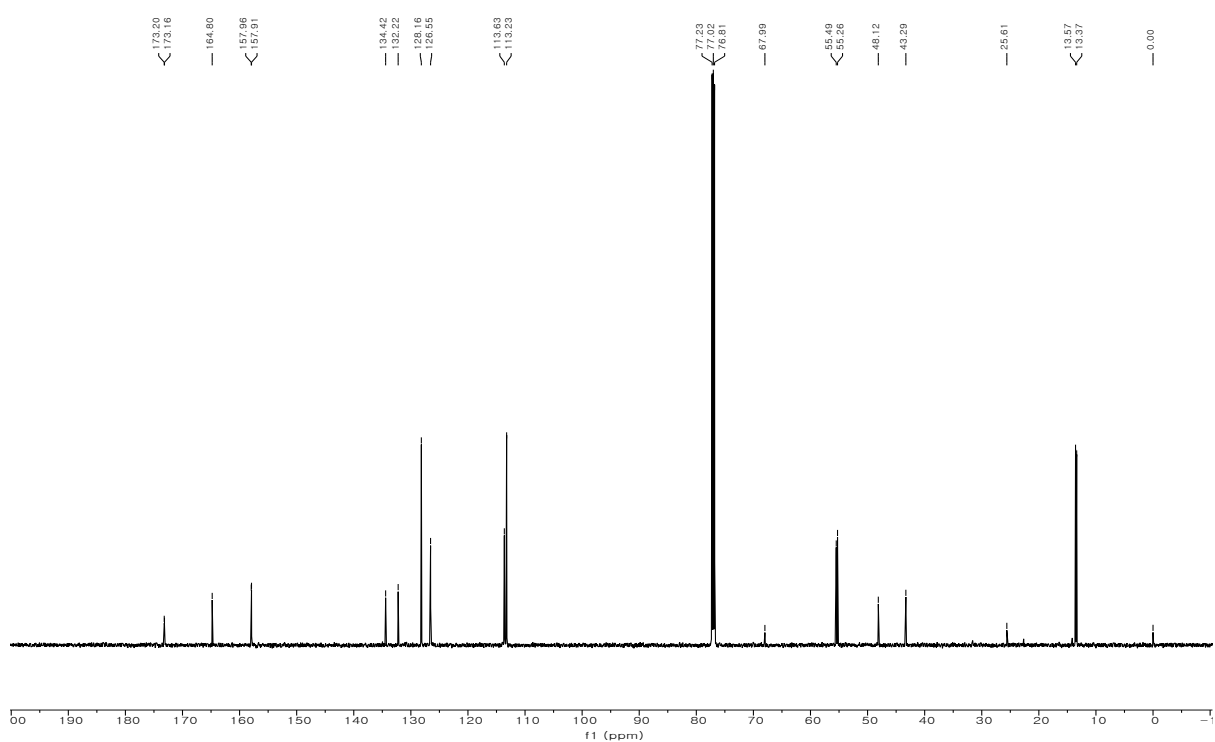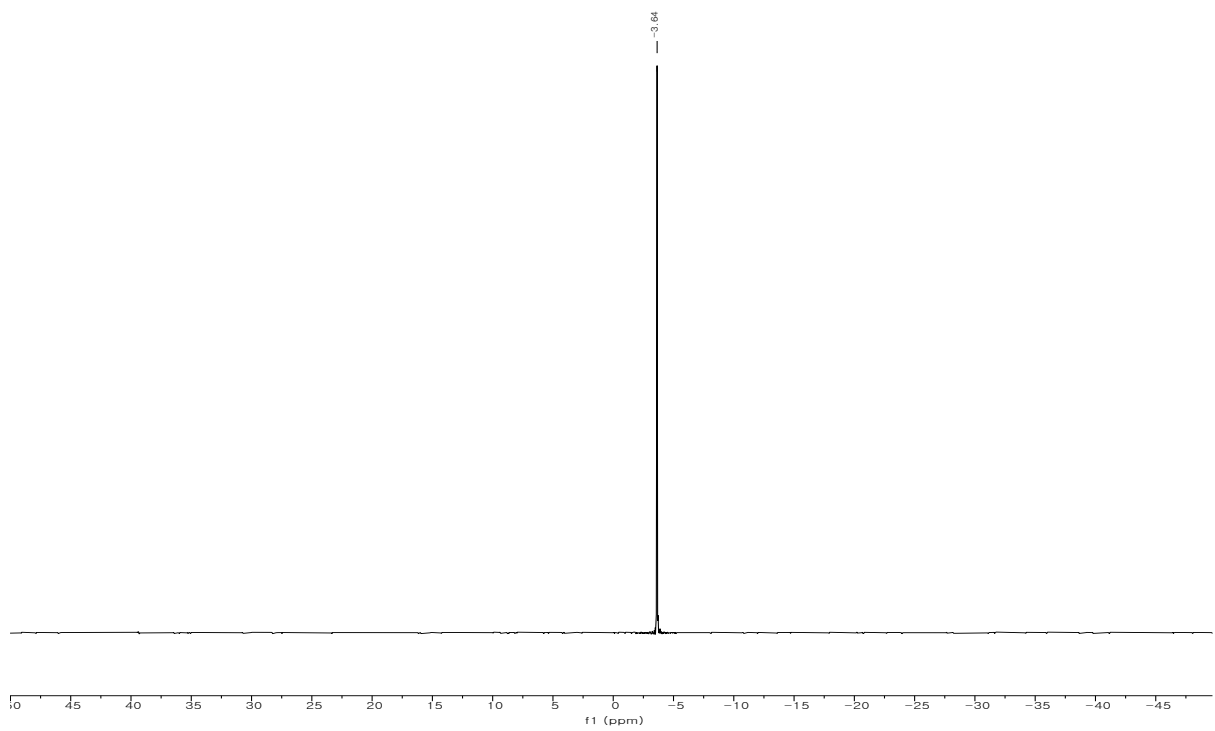

**Figure 6S.**  $^1\text{H}$  and  $^{13}\text{C}$   $\{^1\text{H}\}$  -NMR spectra of  $(\text{R-NCO})_3$  ( $\text{R} = 3\text{-methylbenzyl}$ ), **6** in  $\text{CDCl}_3$ .

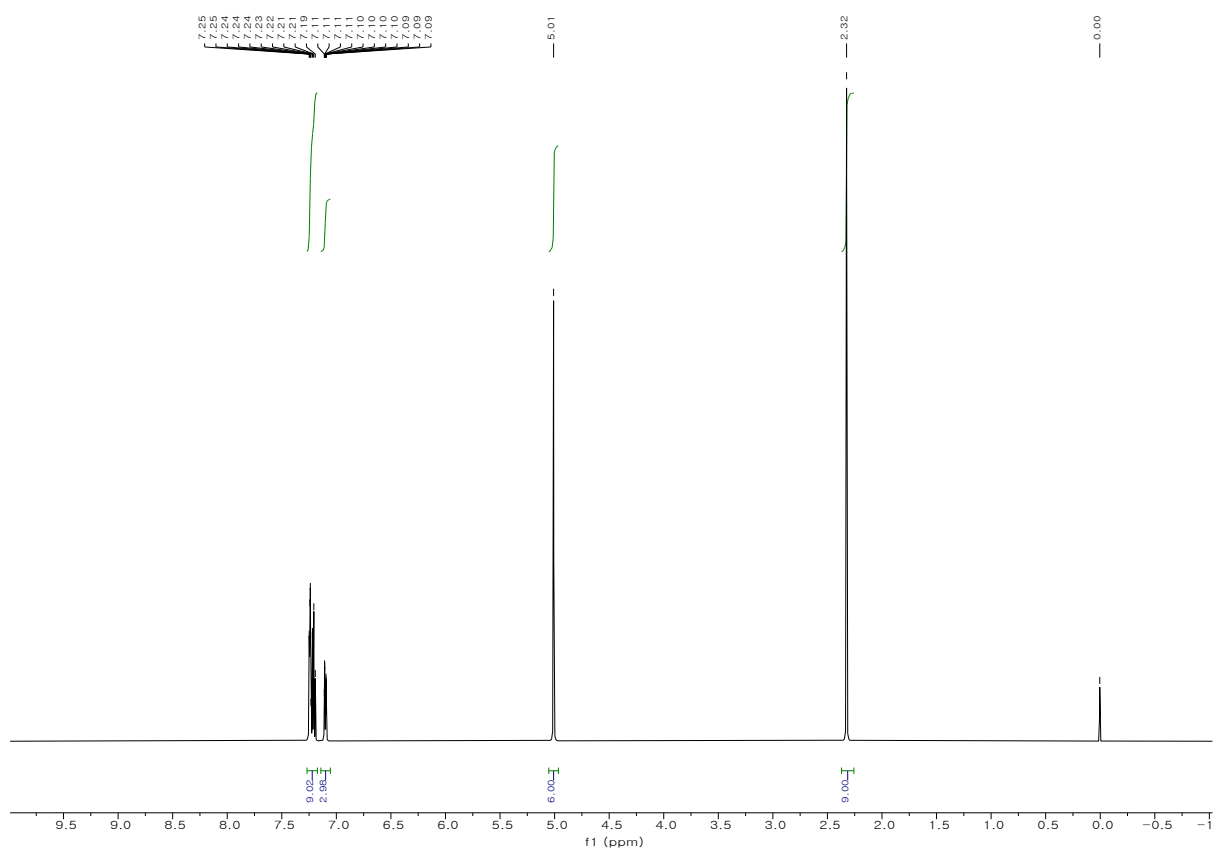

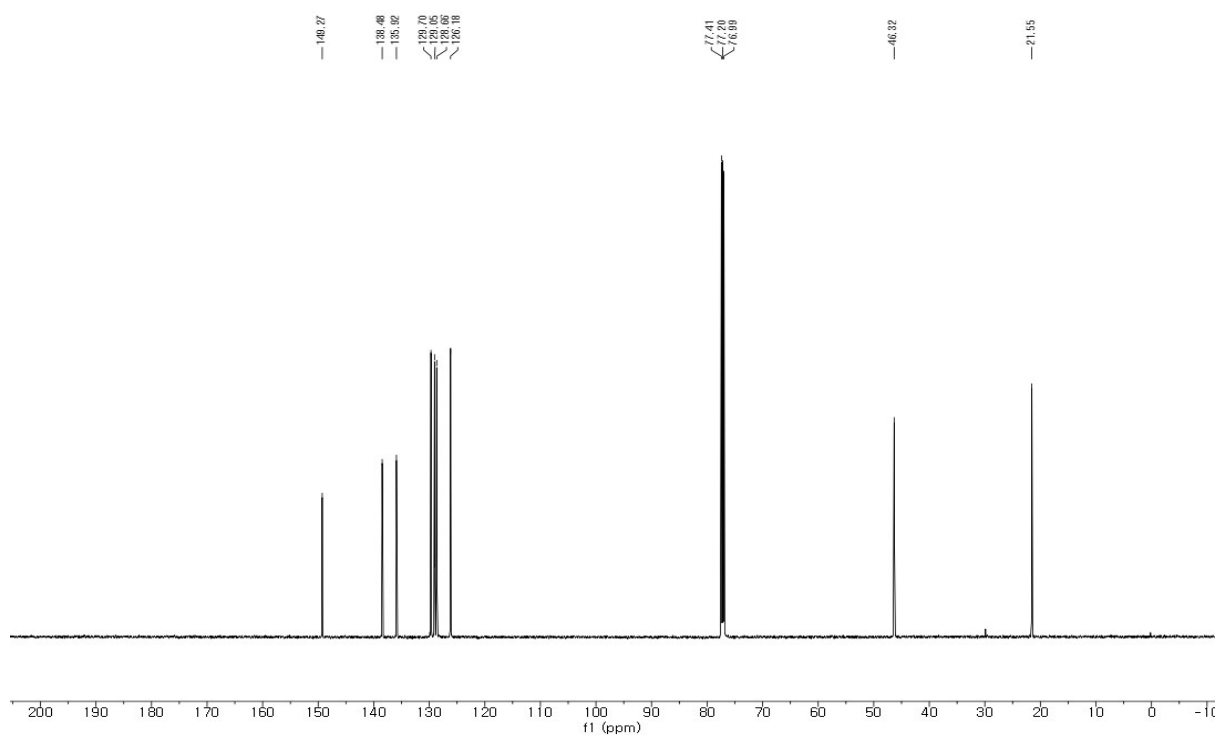

**Figure 7S.**  $^1\text{H}$  and  $^{13}\text{C}\{^1\text{H}\}$  -NMR spectra of  $(\text{R-NCO})_3$  ( $\text{R} = 4\text{-methylbenzyl}$ ), **7** in  $\text{CDCl}_3$ .

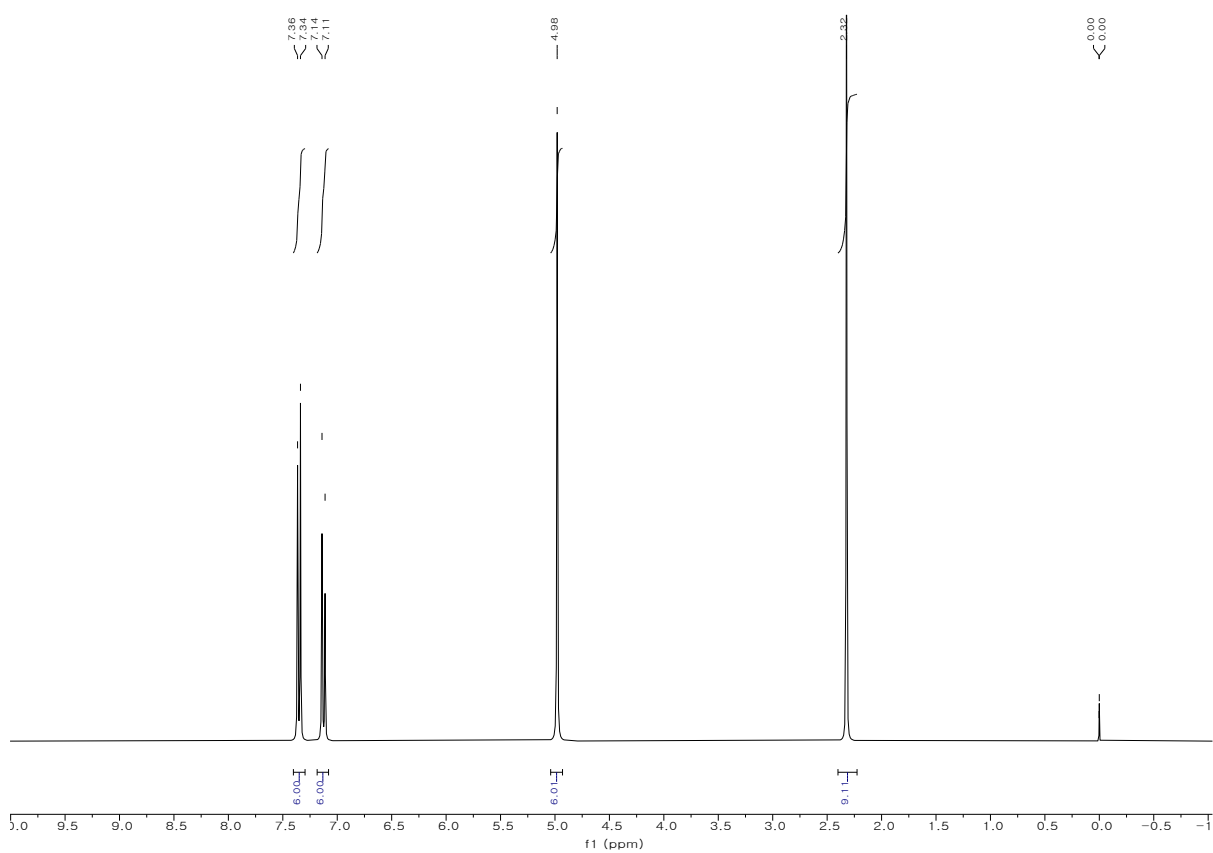



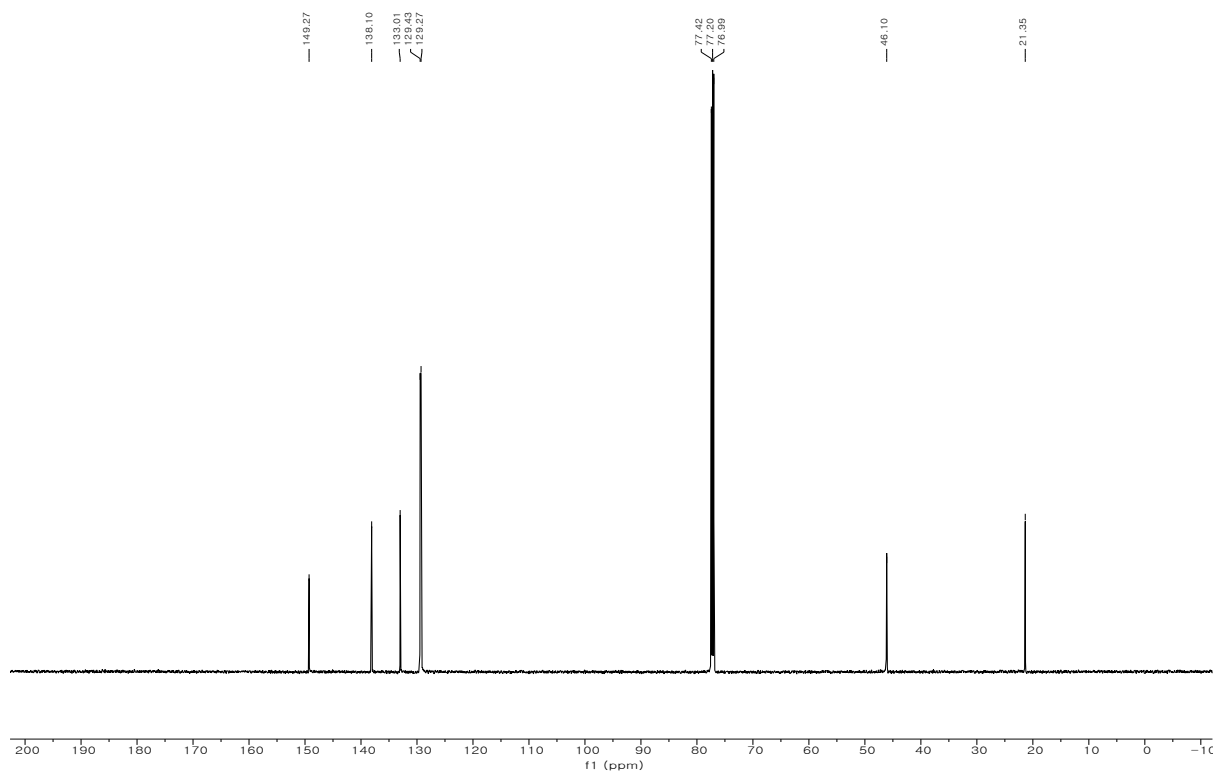

**Figure 8S.**  $^1\text{H}$  and  $^{13}\text{C}\{^1\text{H}\}$  -NMR spectra of  $(\text{R-NCO})_3$  ( $\text{R} = 4\text{-phenoxybenzyl}$ ), **8** in  $\text{CDCl}_3$ .

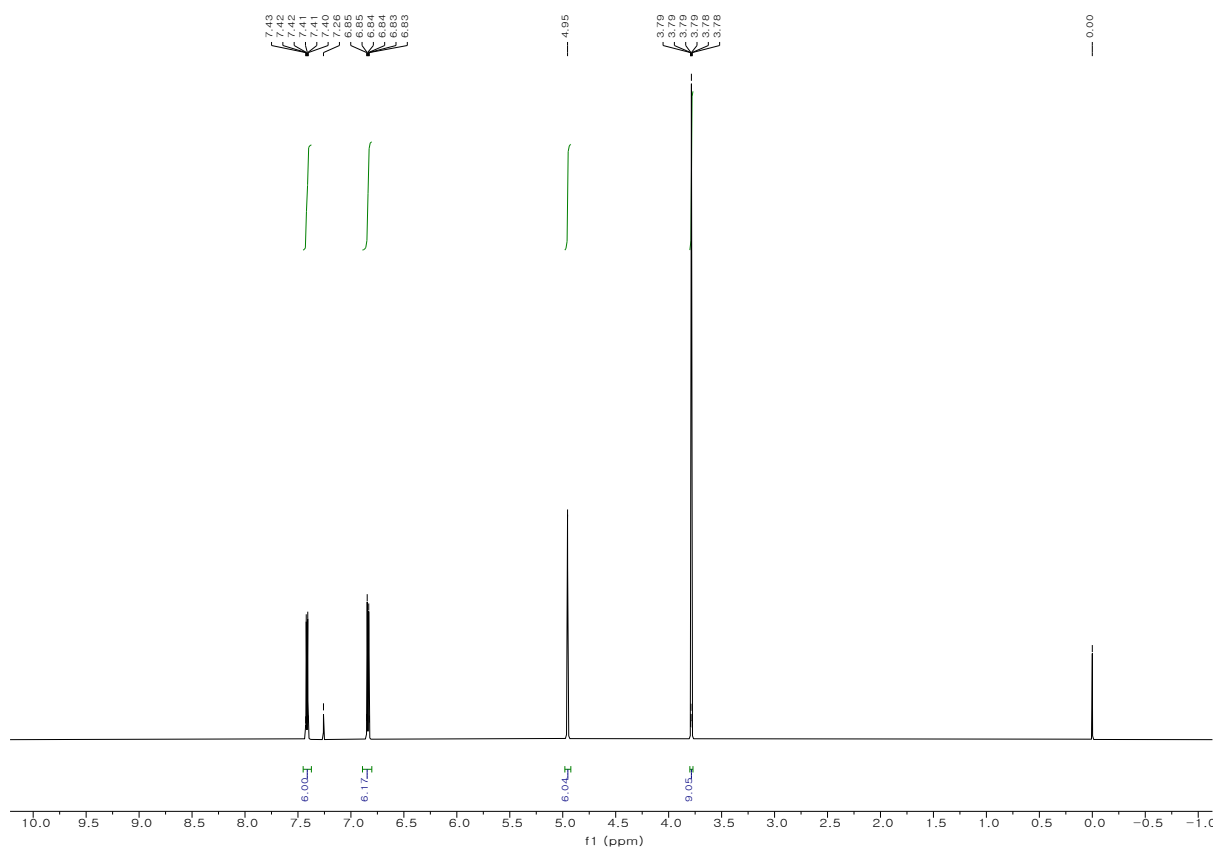

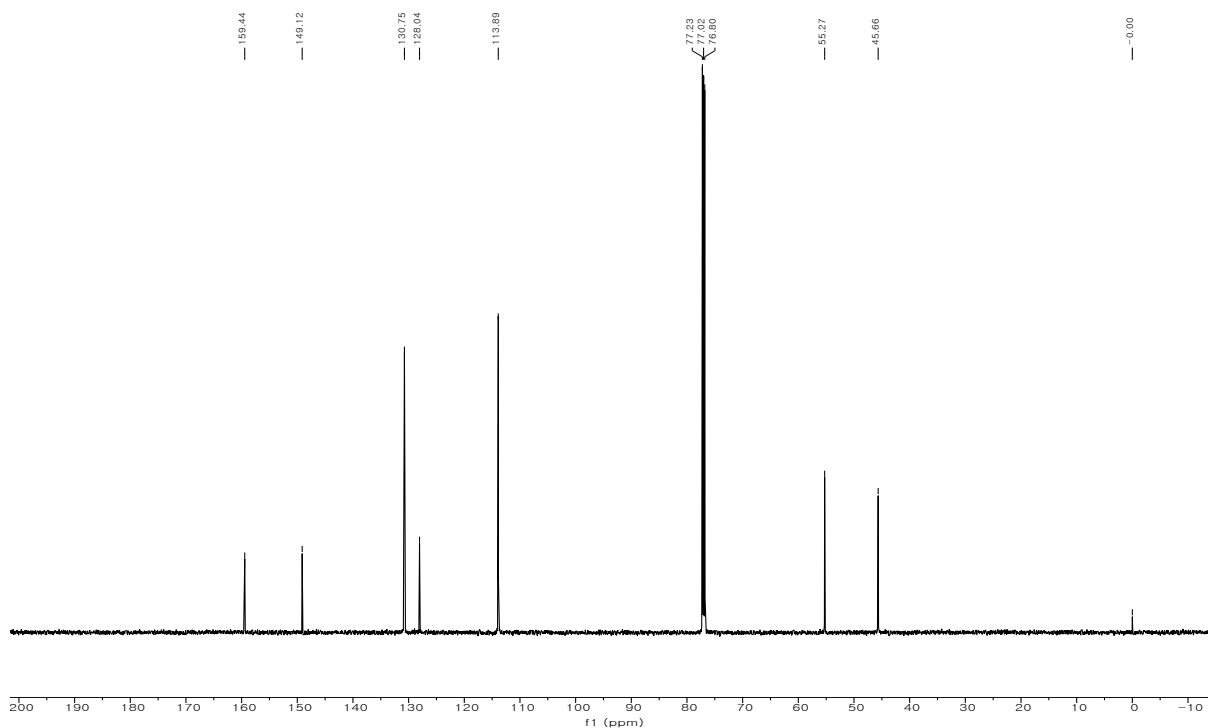

**Figure 9S.**  $^1\text{H}$ ,  $^{13}\text{C}\{^1\text{H}\}$  and  $^{31}\text{P}\{^1\text{H}\}$ -NMR spectra of *cis*-[Pt{N(R)C(O)N(R)C(O)}(PMe<sub>3</sub>)<sub>2</sub>]  
(R = 3-methylbenzyl), **9** in CDCl<sub>3</sub>.

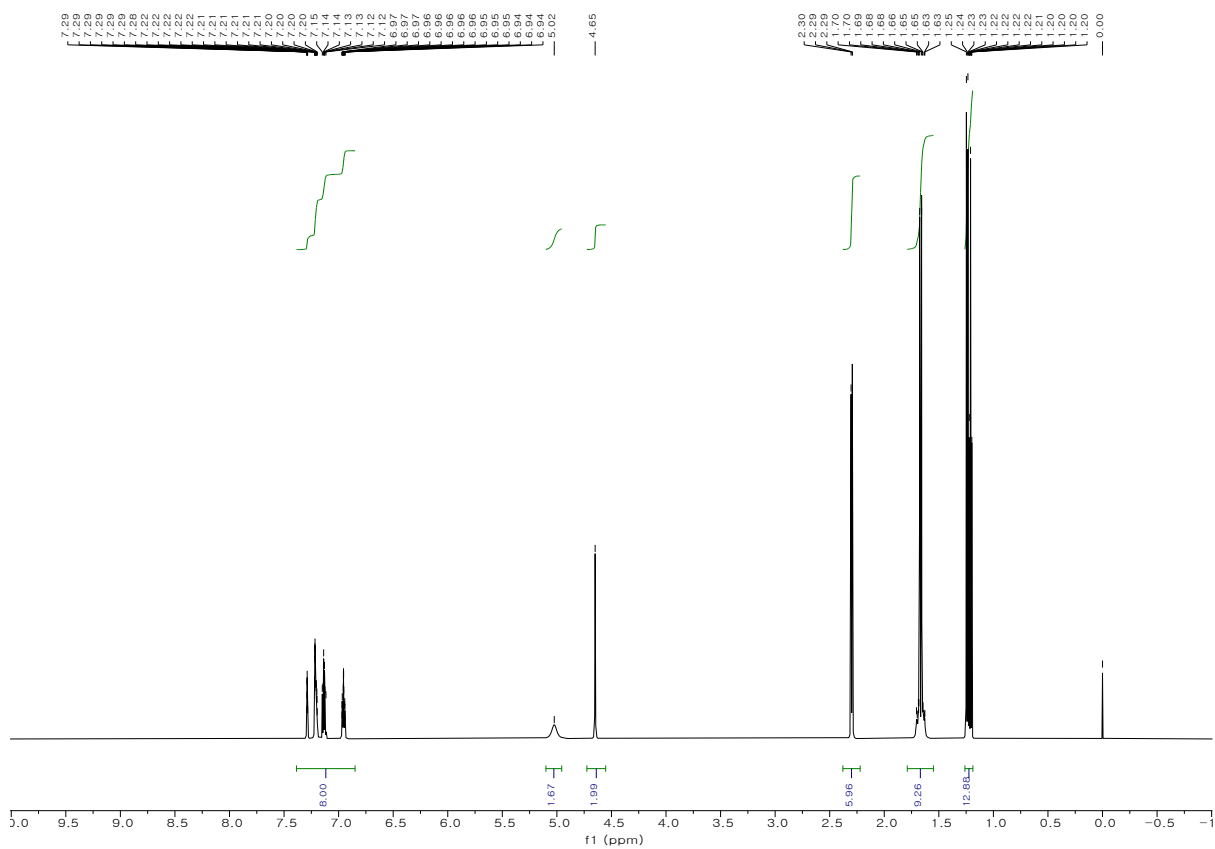

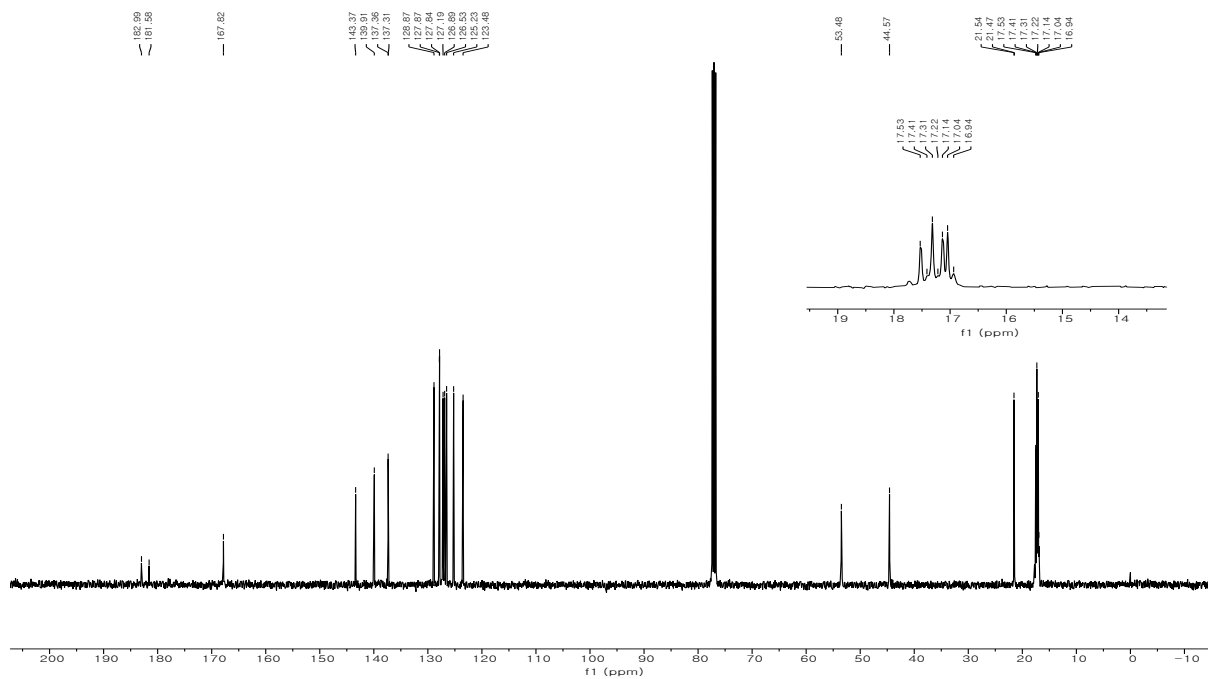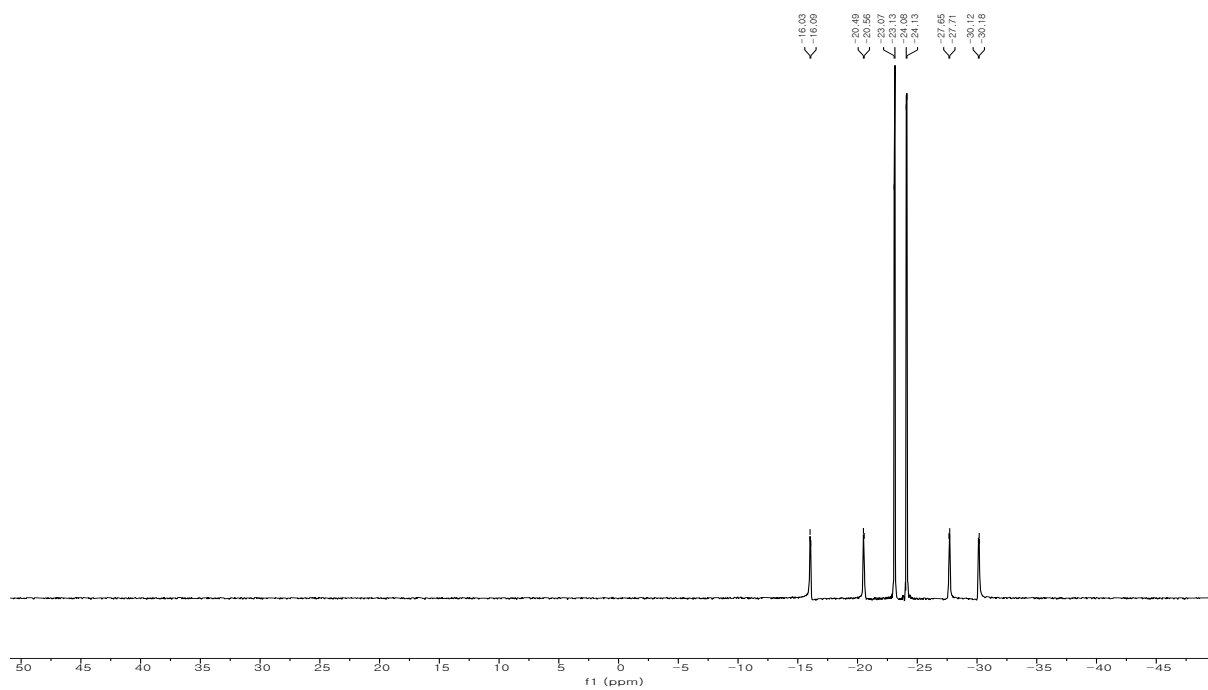

**Figure 10S.**  $^1\text{H}$ ,  $^{13}\text{C}\{^1\text{H}\}$  and  $^3\text{P}\{^1\text{H}\}$ -NMR spectra of *cis*-[Pt{N(R)C(O)N(R)C(O)}(PMe<sub>3</sub>)<sub>2</sub>]  
(R = 4-methylbenzyl), **10** in CDCl<sub>3</sub>.

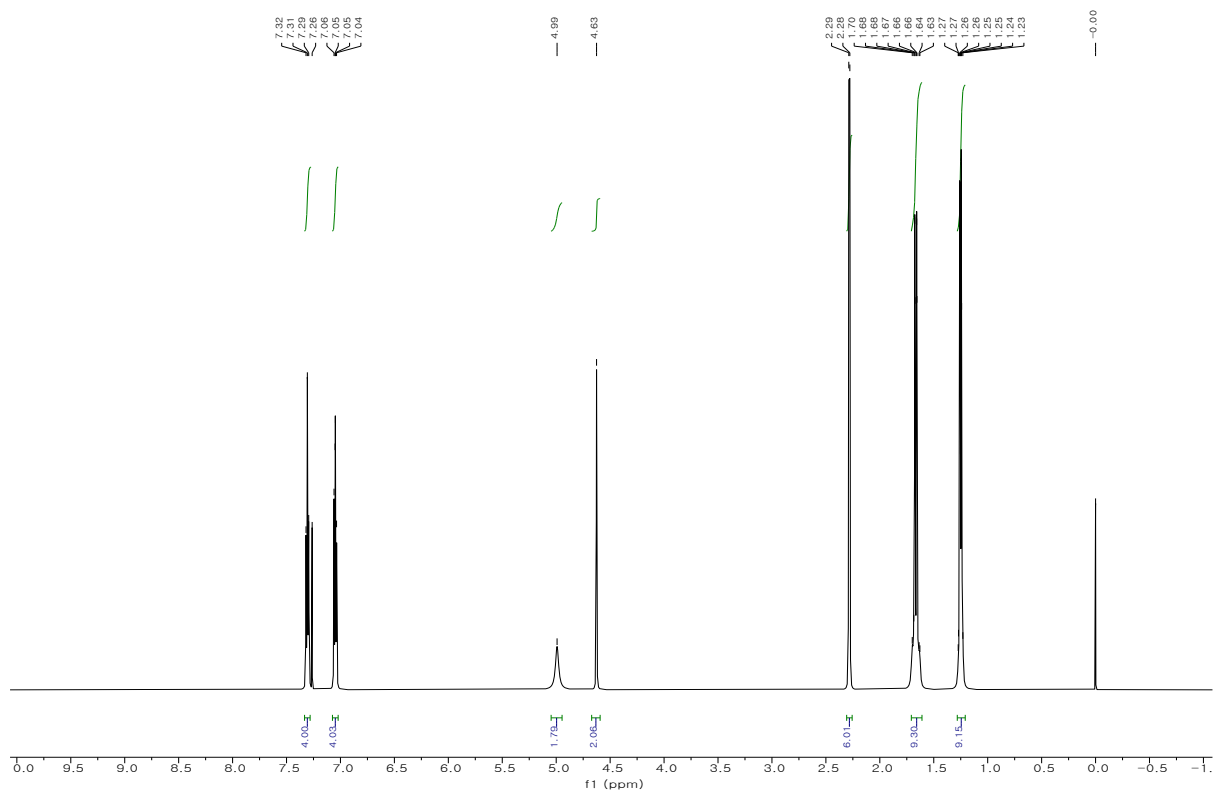

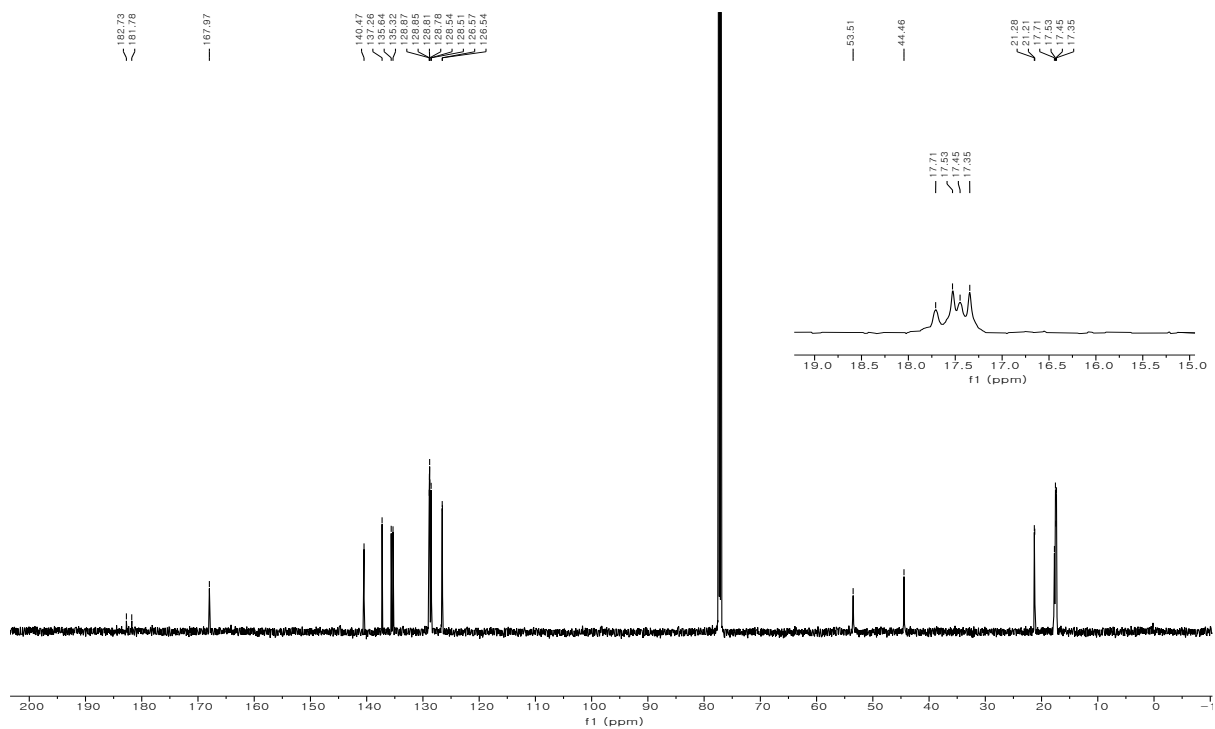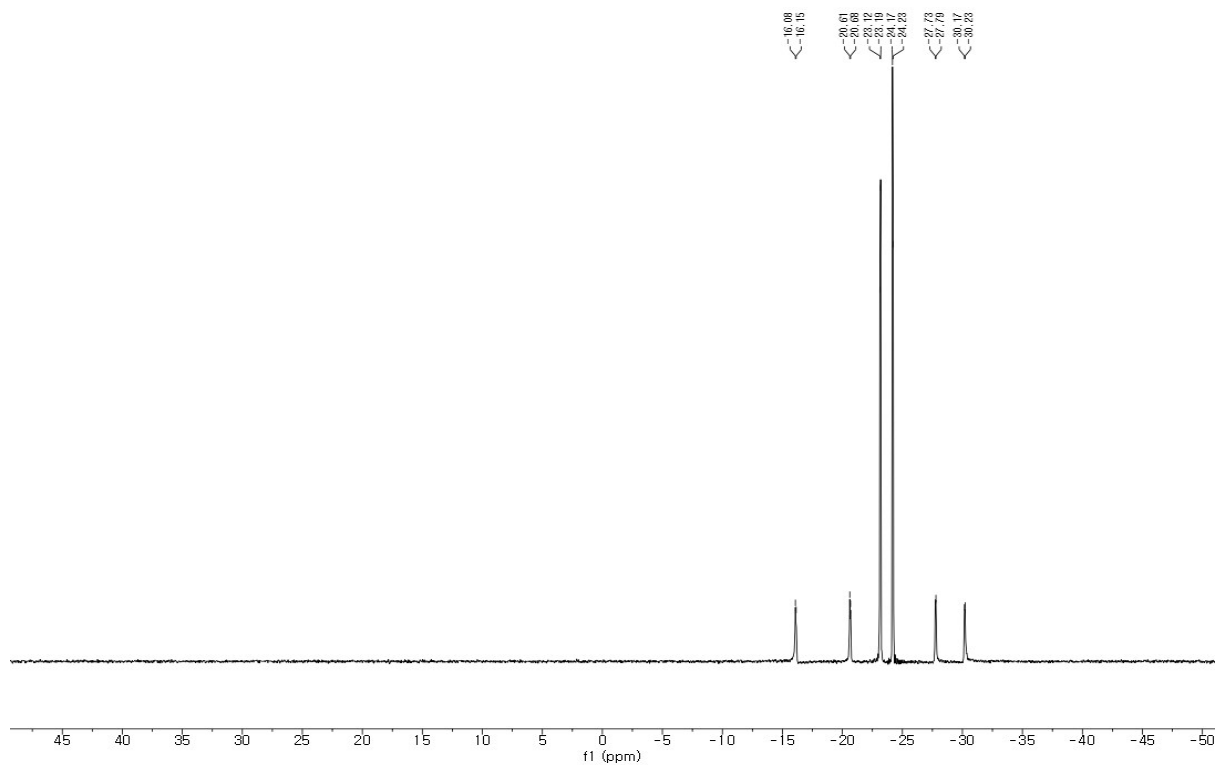

**Figure 11S.**  $^1\text{H}$ ,  $^{13}\text{C}\{^1\text{H}\}$  and  $^{31}\text{P}\{^1\text{H}\}$ -NMR spectra of *cis*-[Pt{-N(R)C(O)N(R)C(O)}(PMe<sub>3</sub>)<sub>2</sub>] (R = 4-fluorobenzyl), **11** in CDCl<sub>3</sub>.

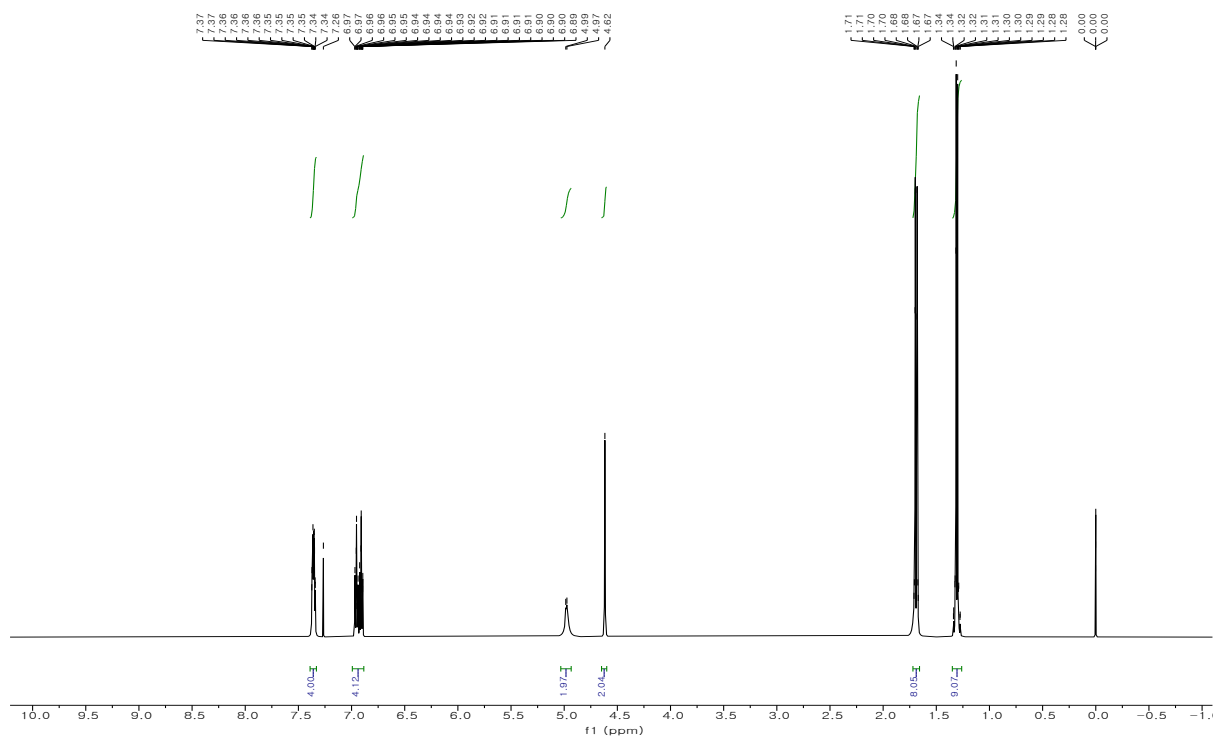

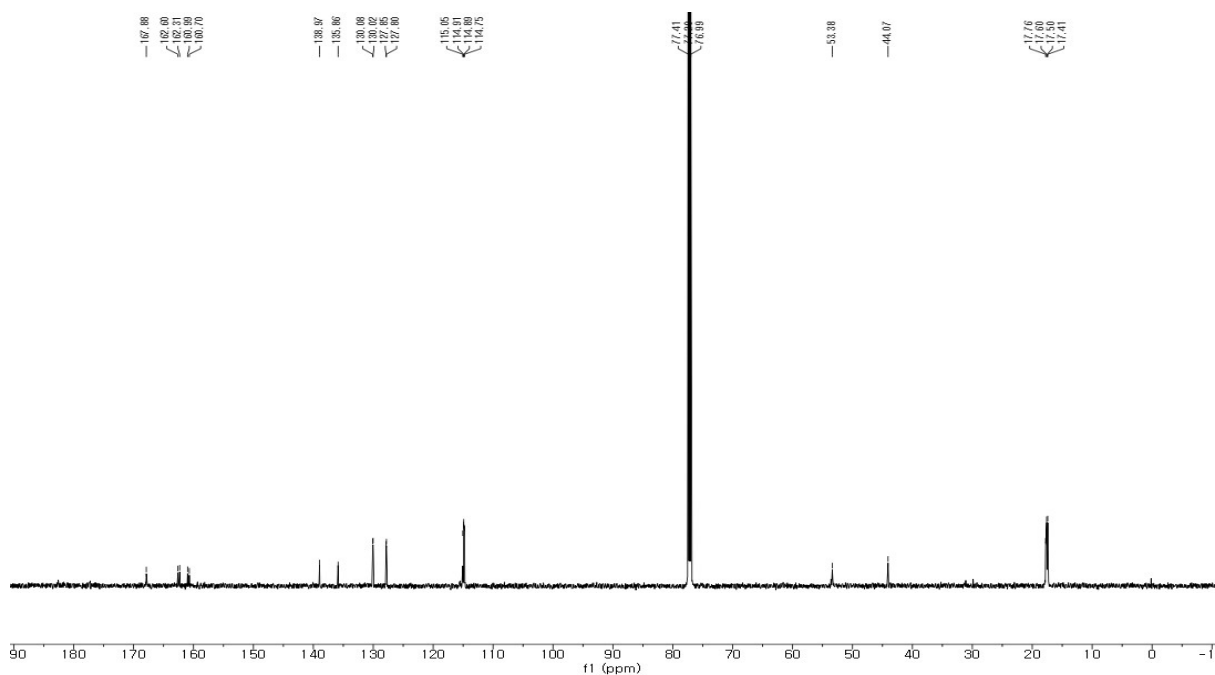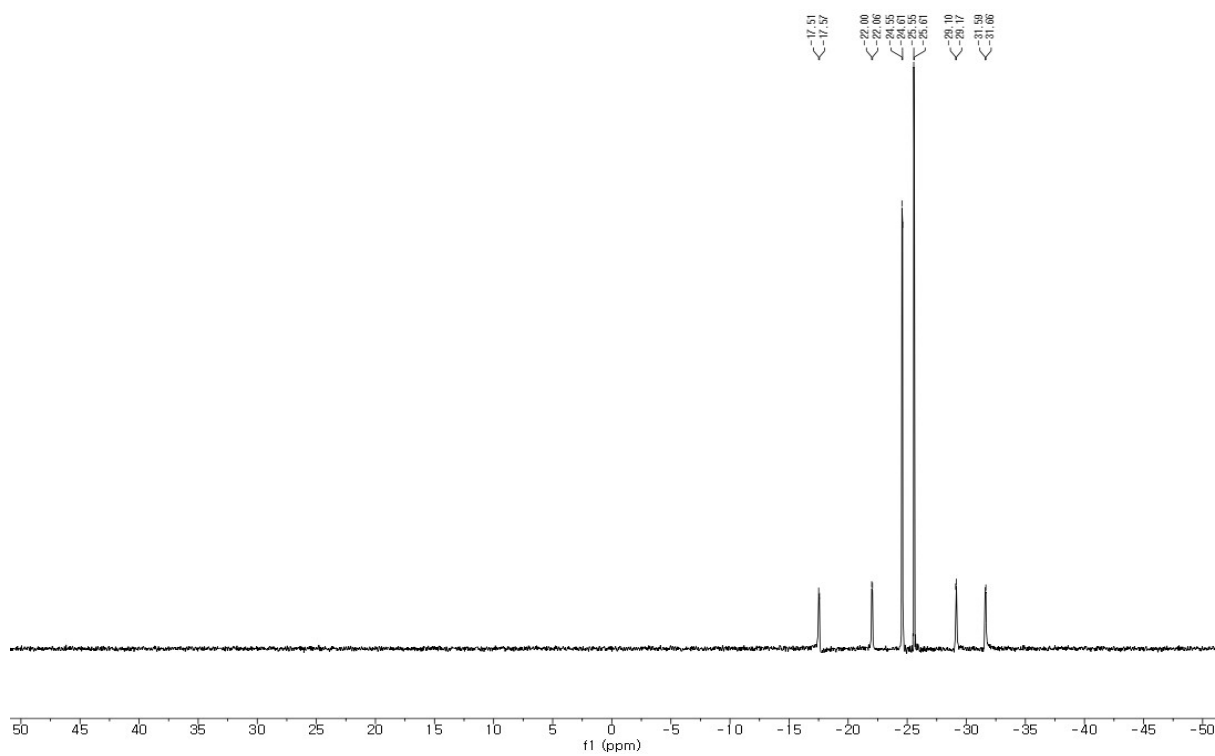

**Figure 12S.**  $^1\text{H}$ ,  $^{13}\text{C}\{^1\text{H}\}$  and  $^{31}\text{P}\{^1\text{H}\}$ -NMR spectra of *cis*-[Pt{-(R)C(O)N(R)C(O)-}(PMe<sub>3</sub>)<sub>2</sub>] (R = 4-methoxybenzyl), **12** in CDCl<sub>3</sub>.

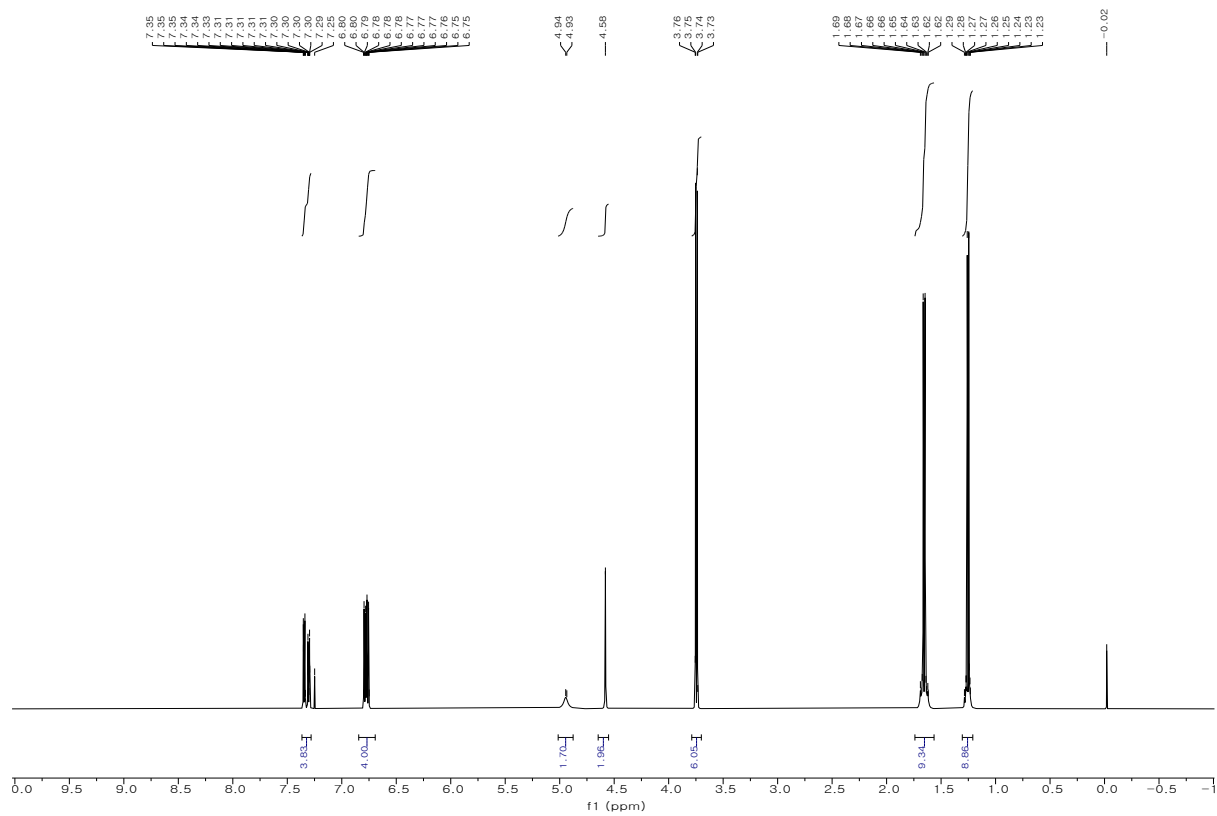



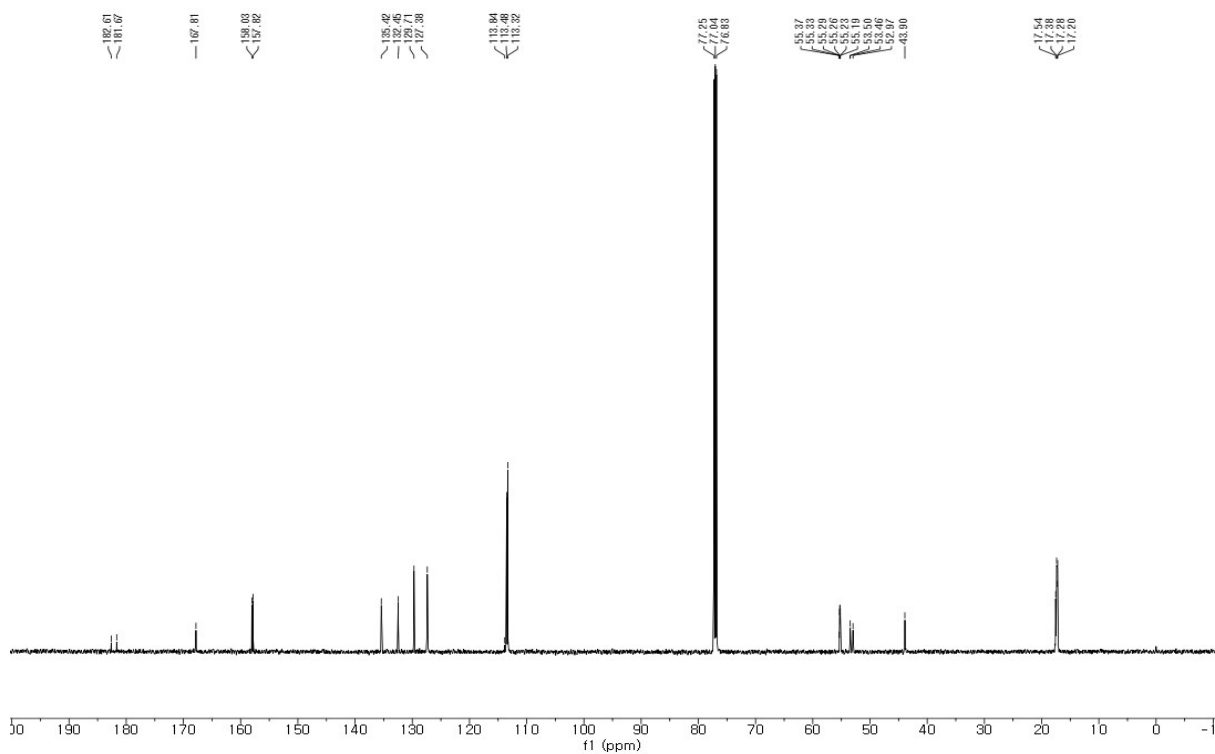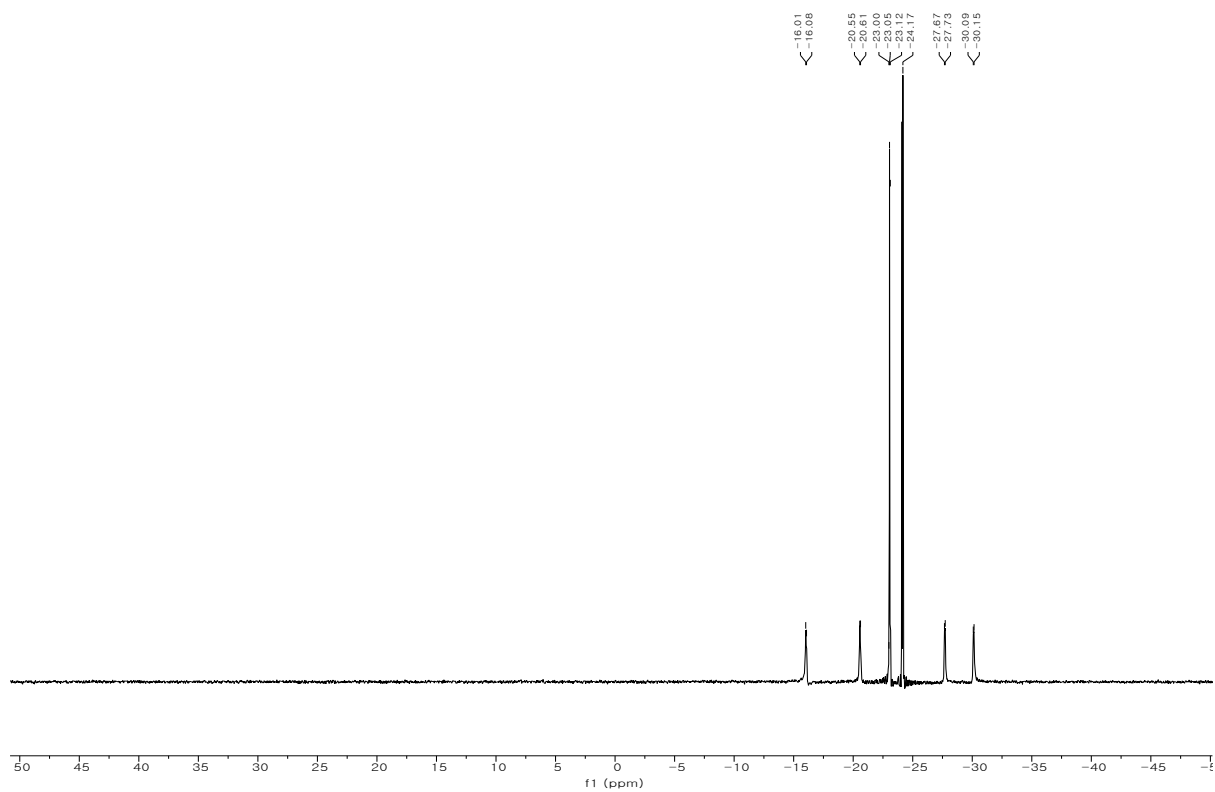

**Figure 13S.** <sup>1</sup>H, <sup>13</sup>C{<sup>1</sup>H} and <sup>31</sup>P{<sup>1</sup>H}-NMR spectra of *cis*-[Pt{-N(R)C(O)N(R)C(O)-}(PMe<sub>3</sub>)<sub>2</sub>] {R = (S)-(+)-1-(1-naphthyl)ethyl}, **13** in CDCl<sub>3</sub>.

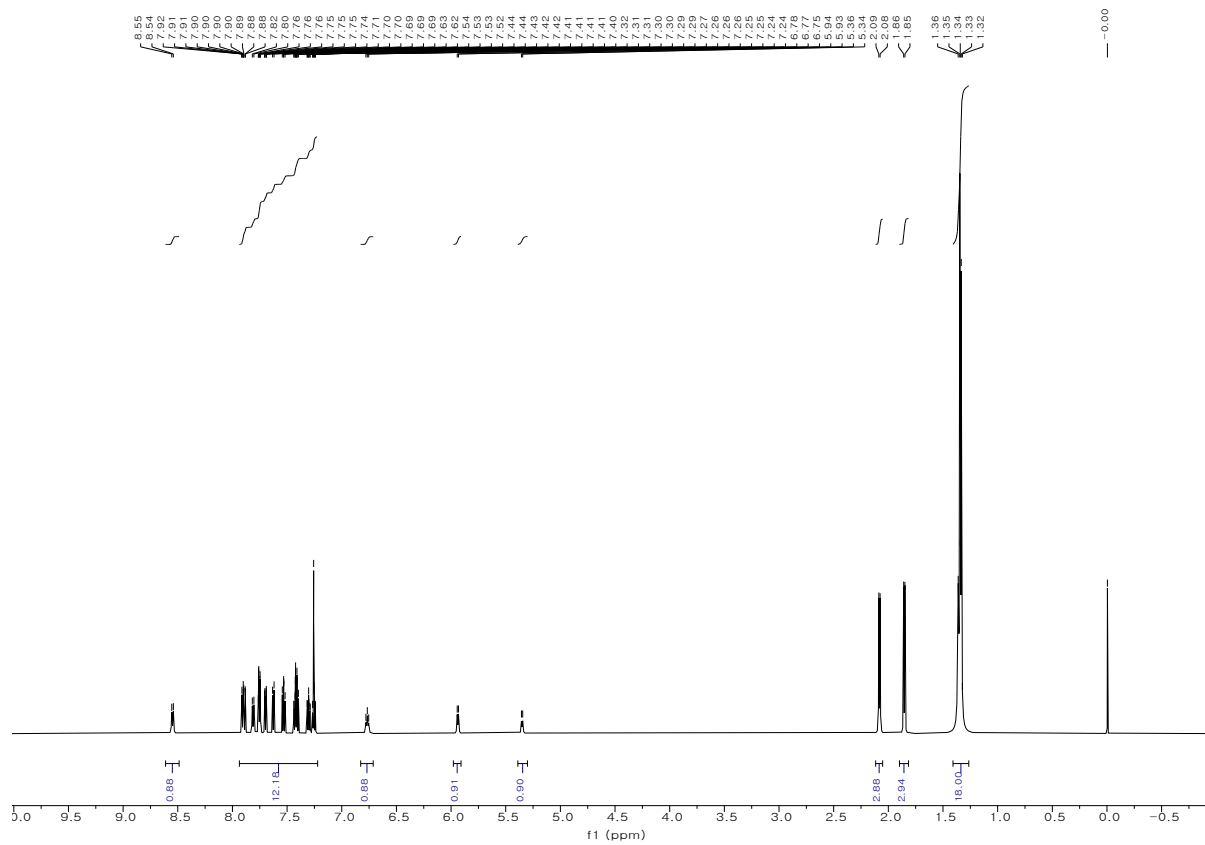

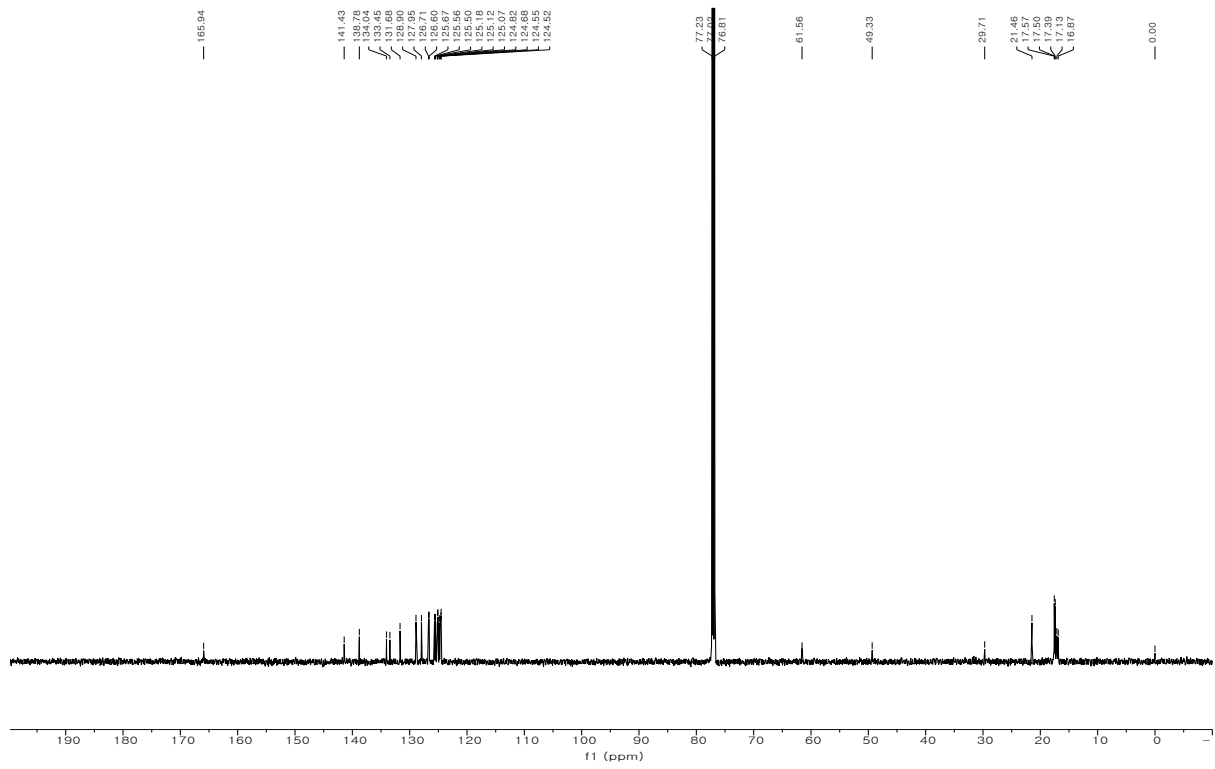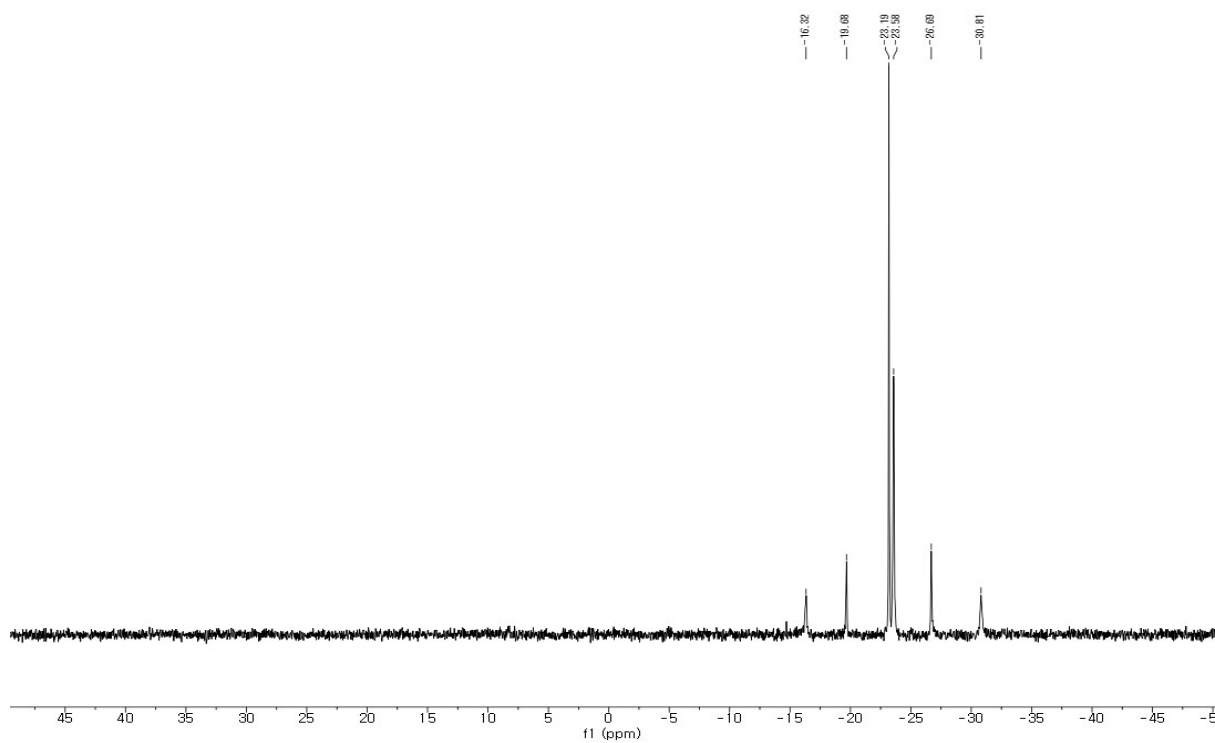

**Figure 14S.**  $^1\text{H}$ ,  $^{13}\text{C}\{^1\text{H}\}$  and  $^{31}\text{P}\{^1\text{H}\}$ -NMR spectra of *cis*-[Pt{N(R)C(O)N(R)C(O)-}(PMe<sub>3</sub>)<sub>2</sub>] {R = (R)-(-)-1-(1-naphthyl)ethyl }, **14** in CDCl<sub>3</sub>.

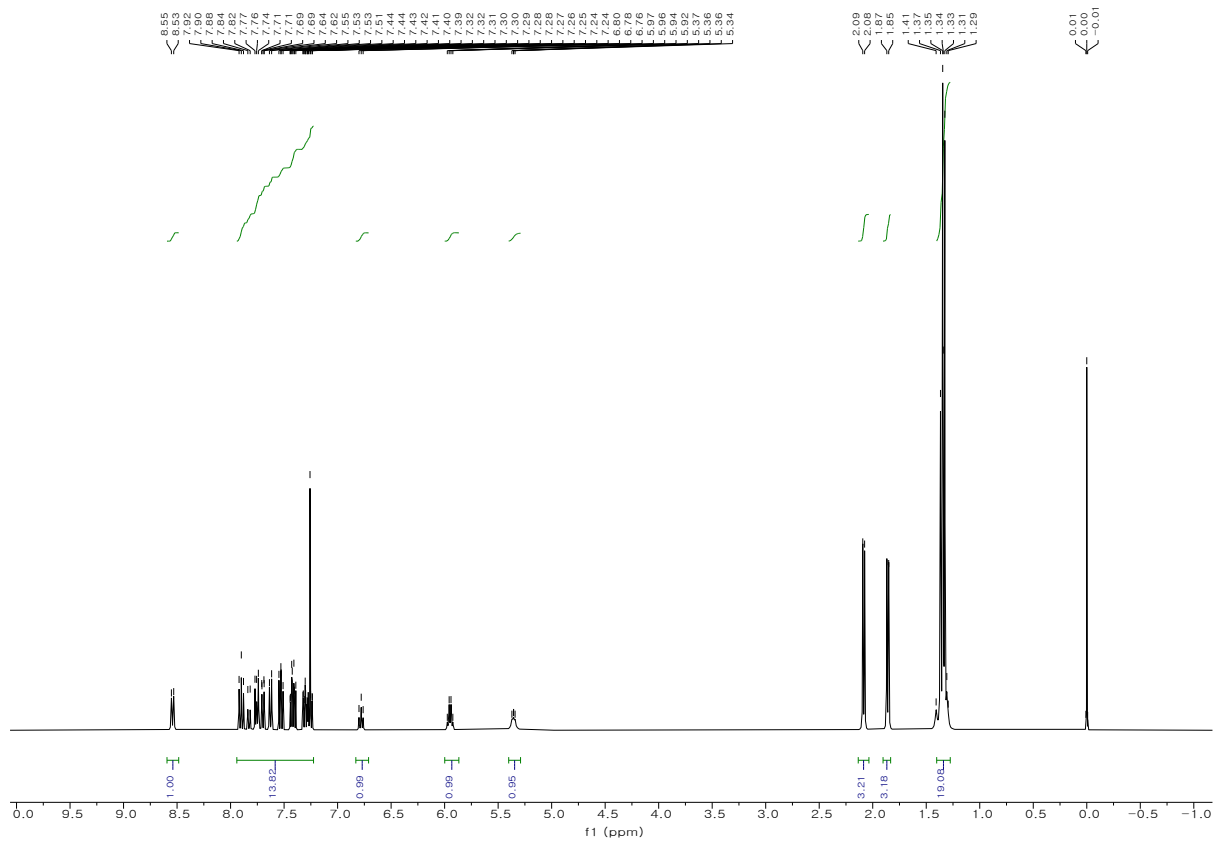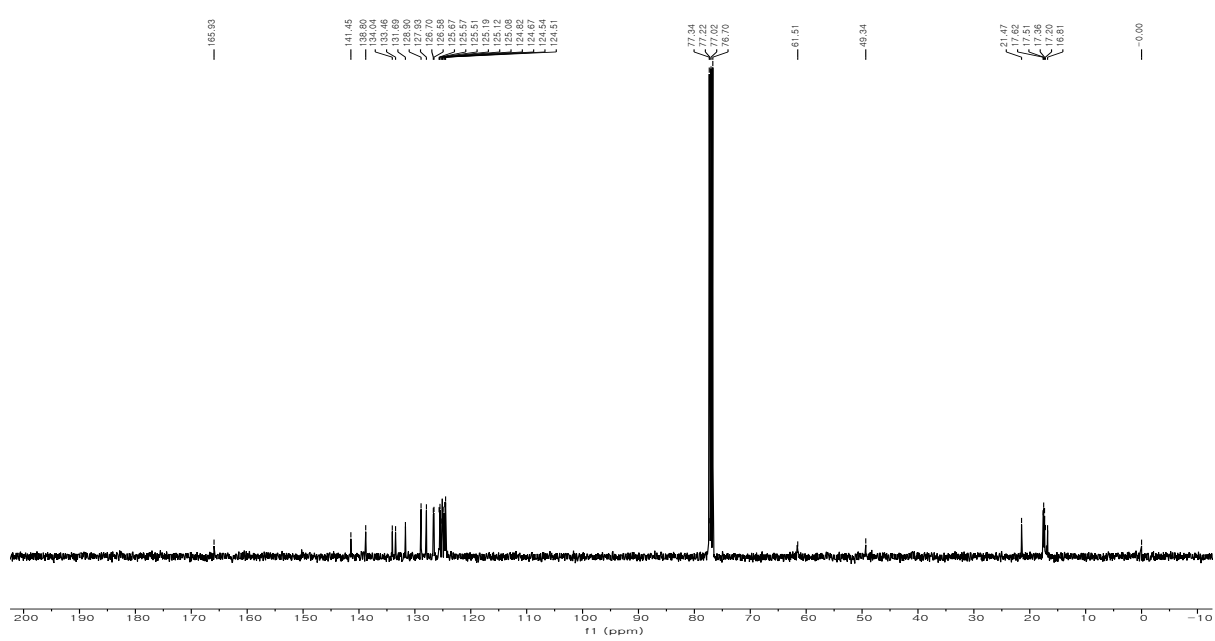

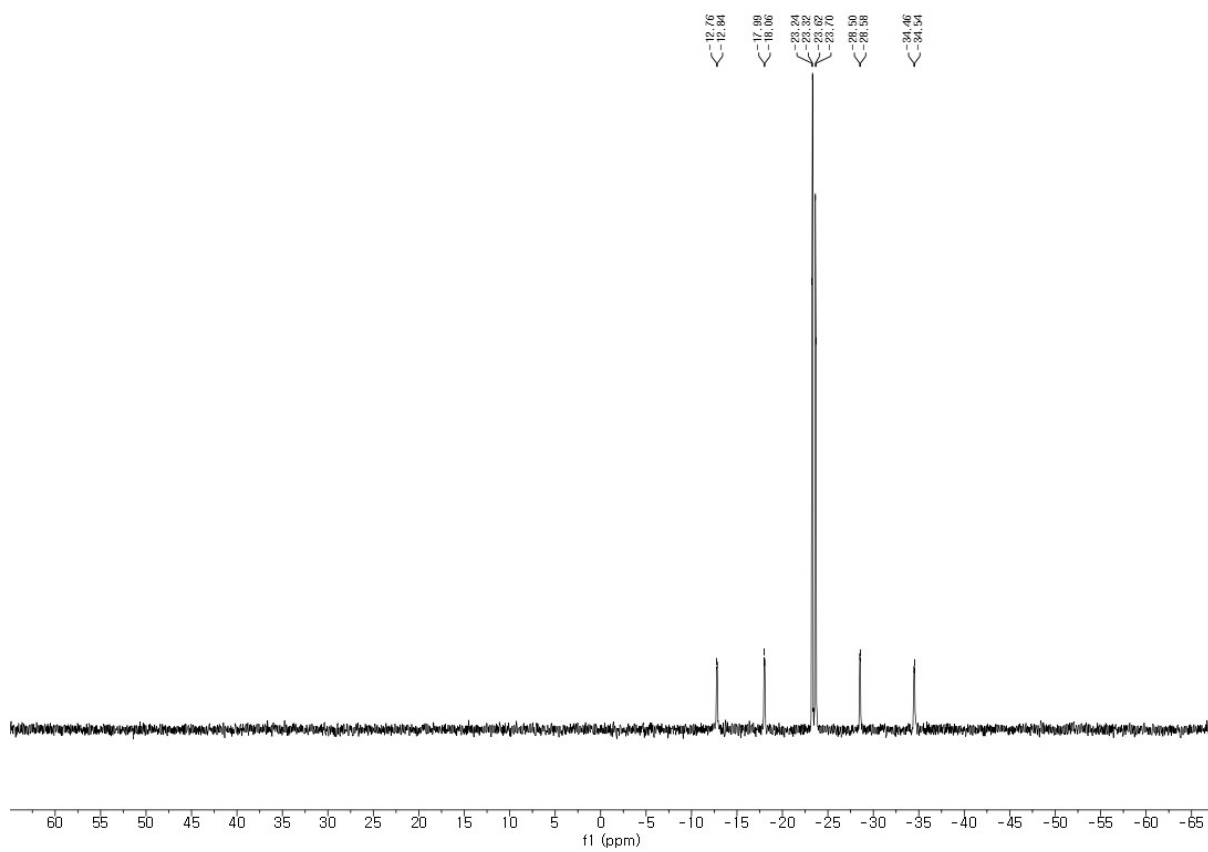

**Figure 15S.**  $^1\text{H}$ ,  $^{13}\text{C}\{^1\text{H}\}$  and  $^{31}\text{P}\{^1\text{H}\}$ -NMR spectra of *cis*-[Pt{-N(R)C(O)N(R)C(O)-}(PMe<sub>3</sub>)<sub>2</sub>] (R = 4-phenoxyphenyl, **15** in CDCl<sub>3</sub>).

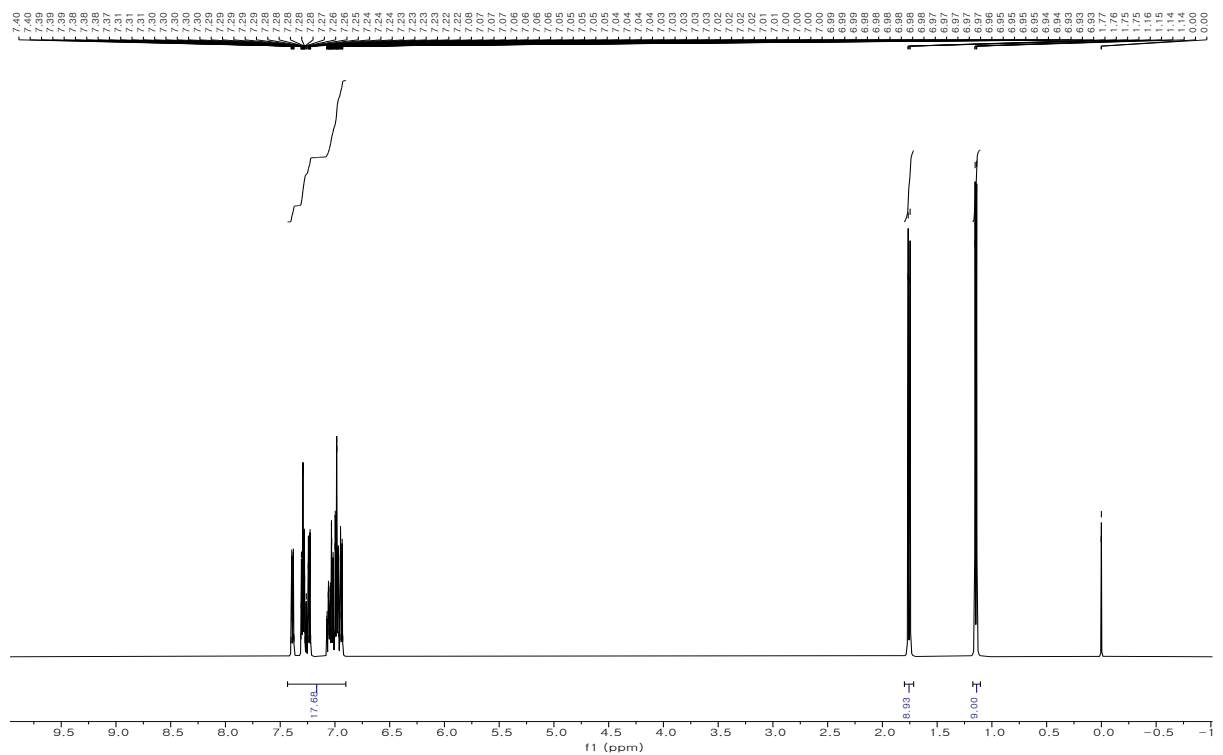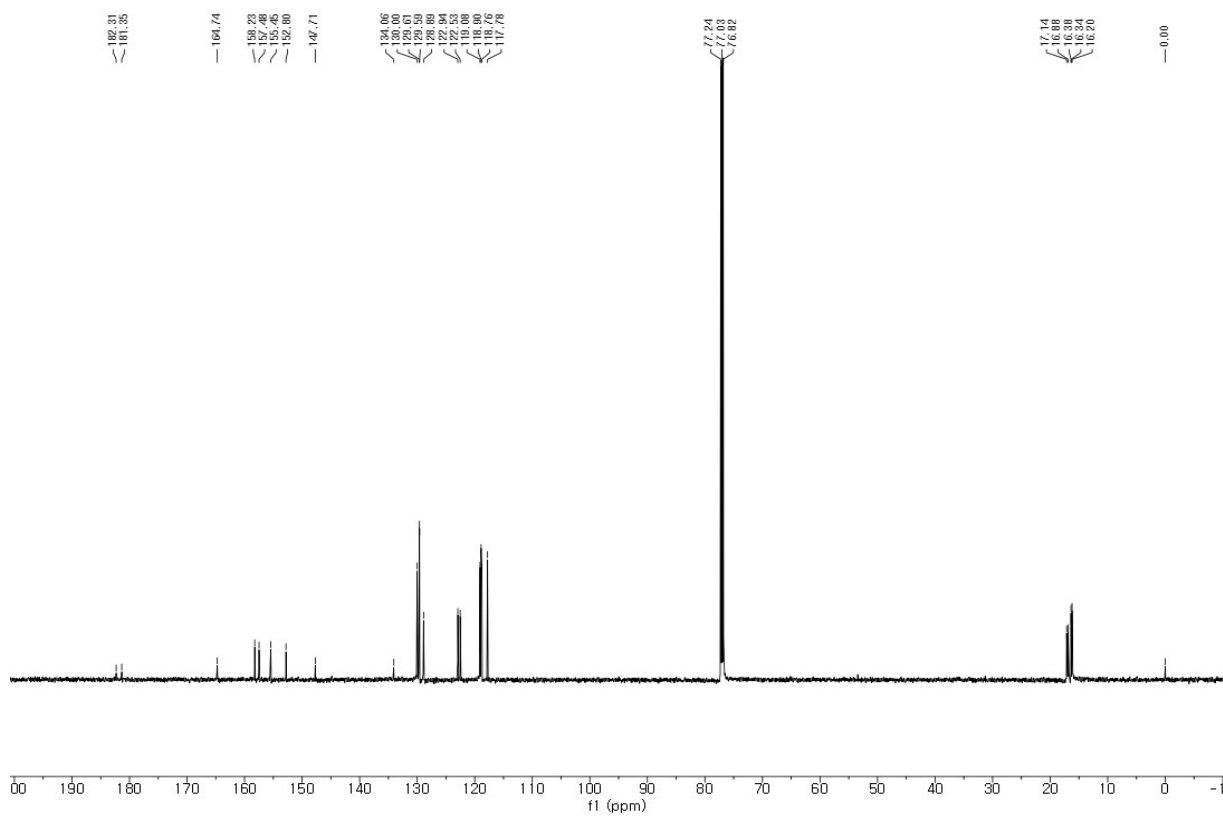

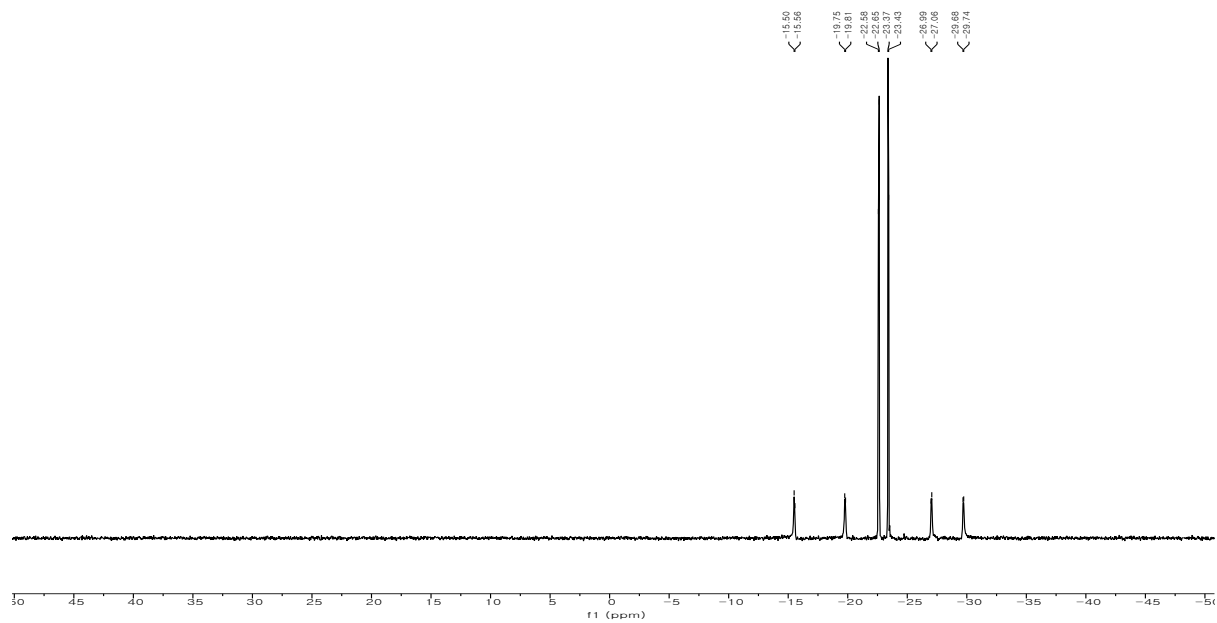



**Figure 16S.**  $^1\text{H}$ ,  $^{13}\text{C}\{^1\text{H}\}$  and  $^{31}\text{P}\{^1\text{H}\}$ -NMR spectra of *cis*-[Pt{-N(R)C(O)N(R)C(O)-}(PMe<sub>3</sub>)<sub>2</sub>] (R = 2,6-difluorophenyl, **16** in CDCl<sub>3</sub>).

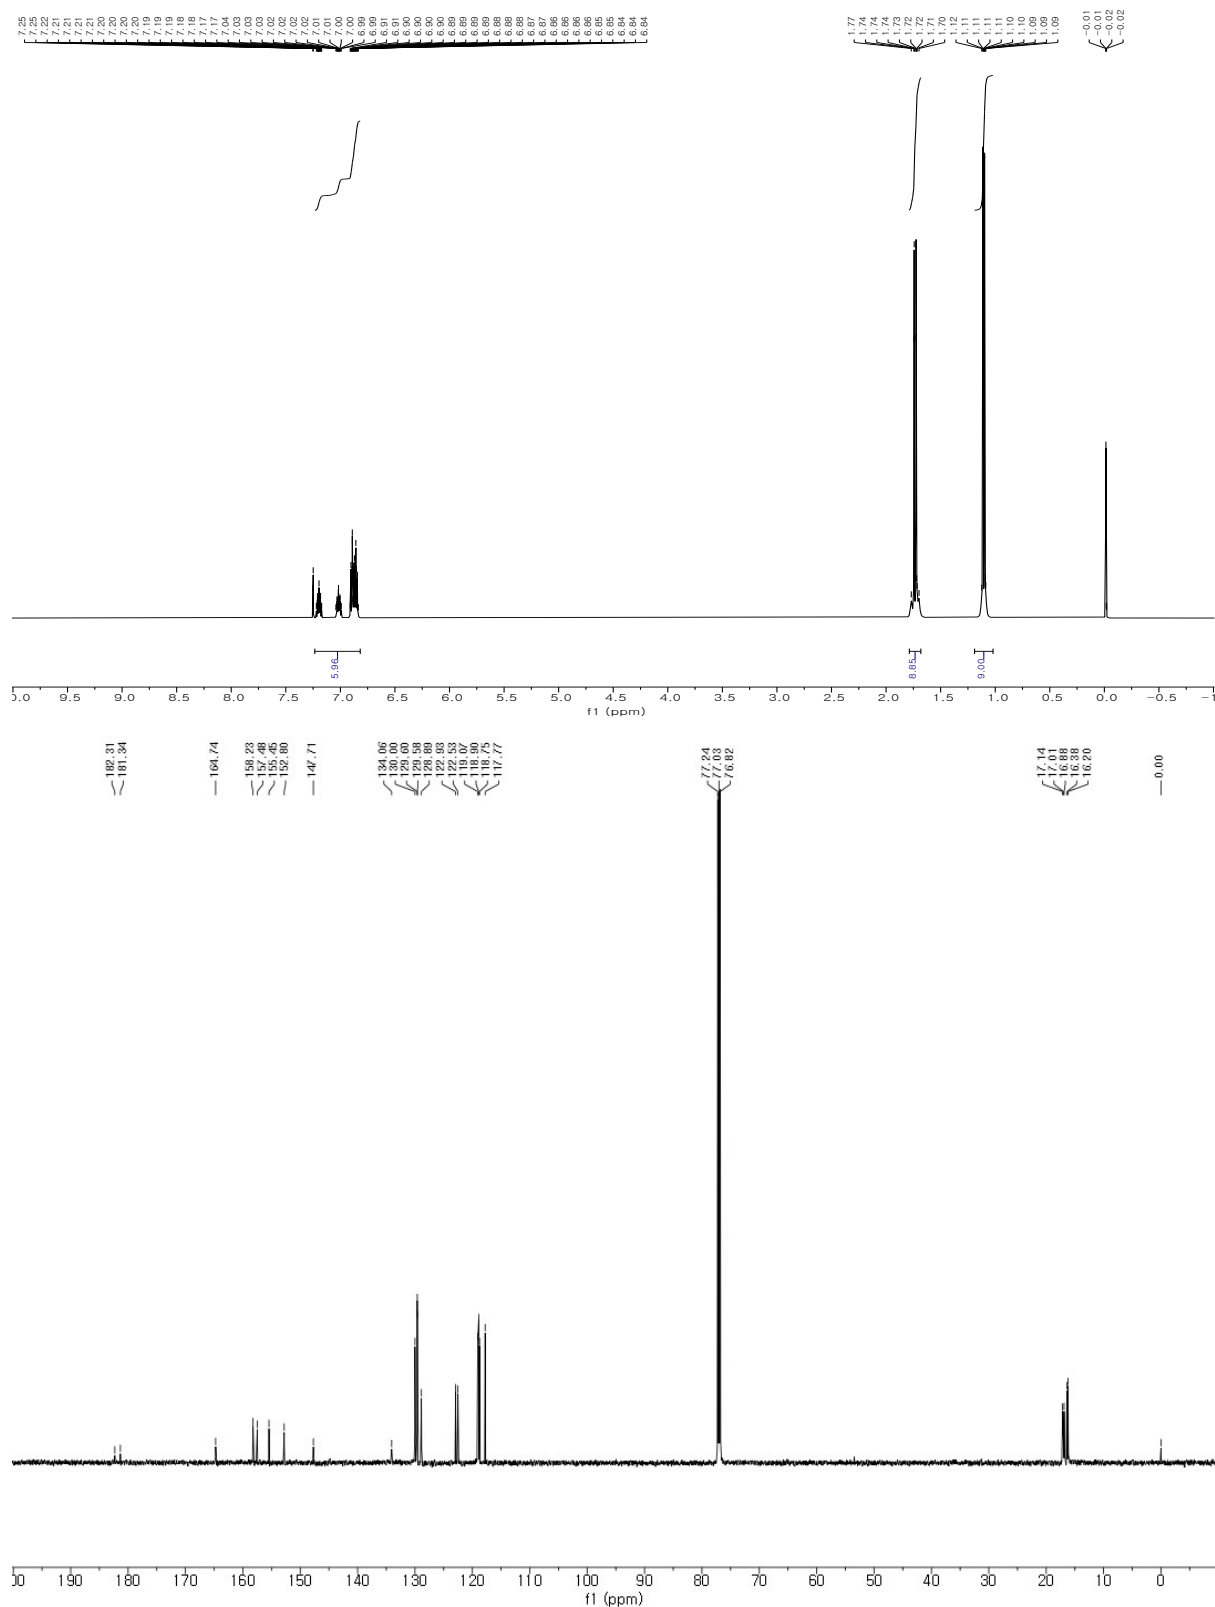

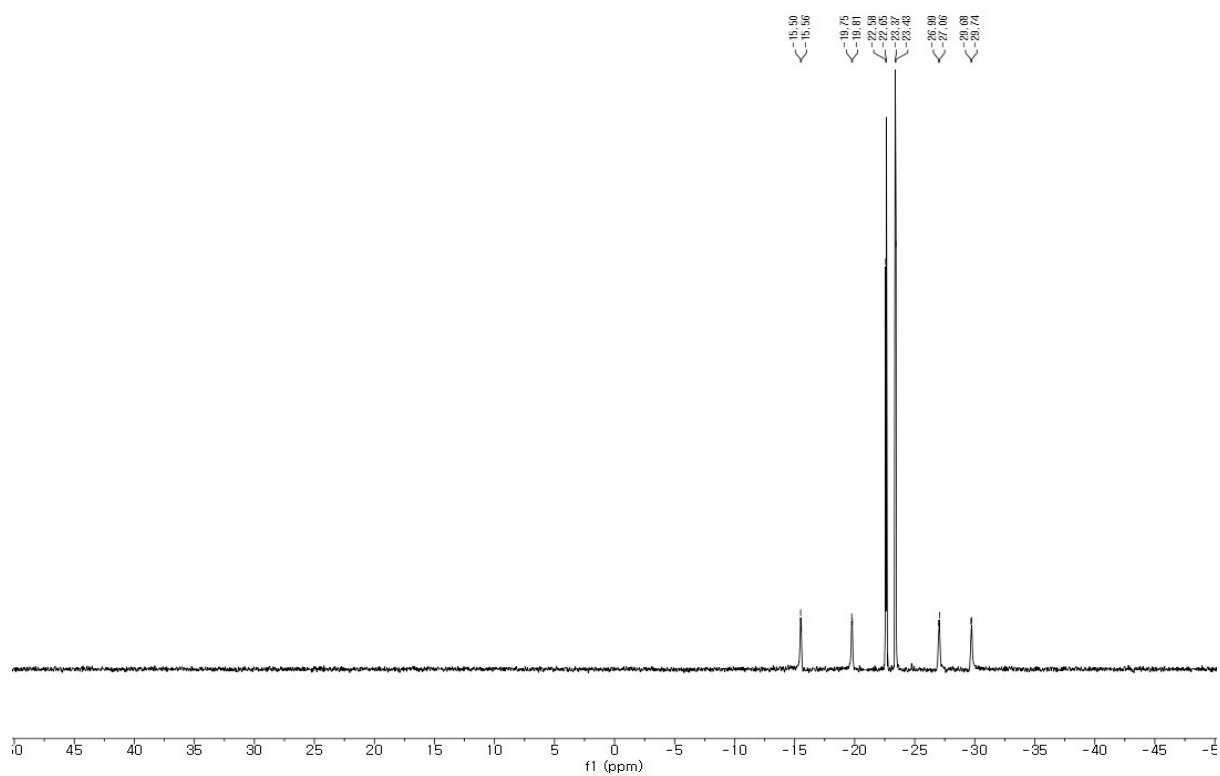

**Figure 17S.**  $^1\text{H}$ ,  $^{13}\text{C}\{^1\text{H}\}$  and  $^{31}\text{P}\{^1\text{H}\}$ -NMR spectra of  $\text{Pt}(\text{DEPE})\{-\text{N}(\text{R})\text{C}(\text{O})\text{N}(\text{R})\text{C}(\text{O})-\}$   $\{\text{R} = (\text{S})\text{-}+$   
 $1\text{-}(1\text{-naphthyl})\text{ethyl}\}$ , **17** in  $\text{CDCl}_3$ .

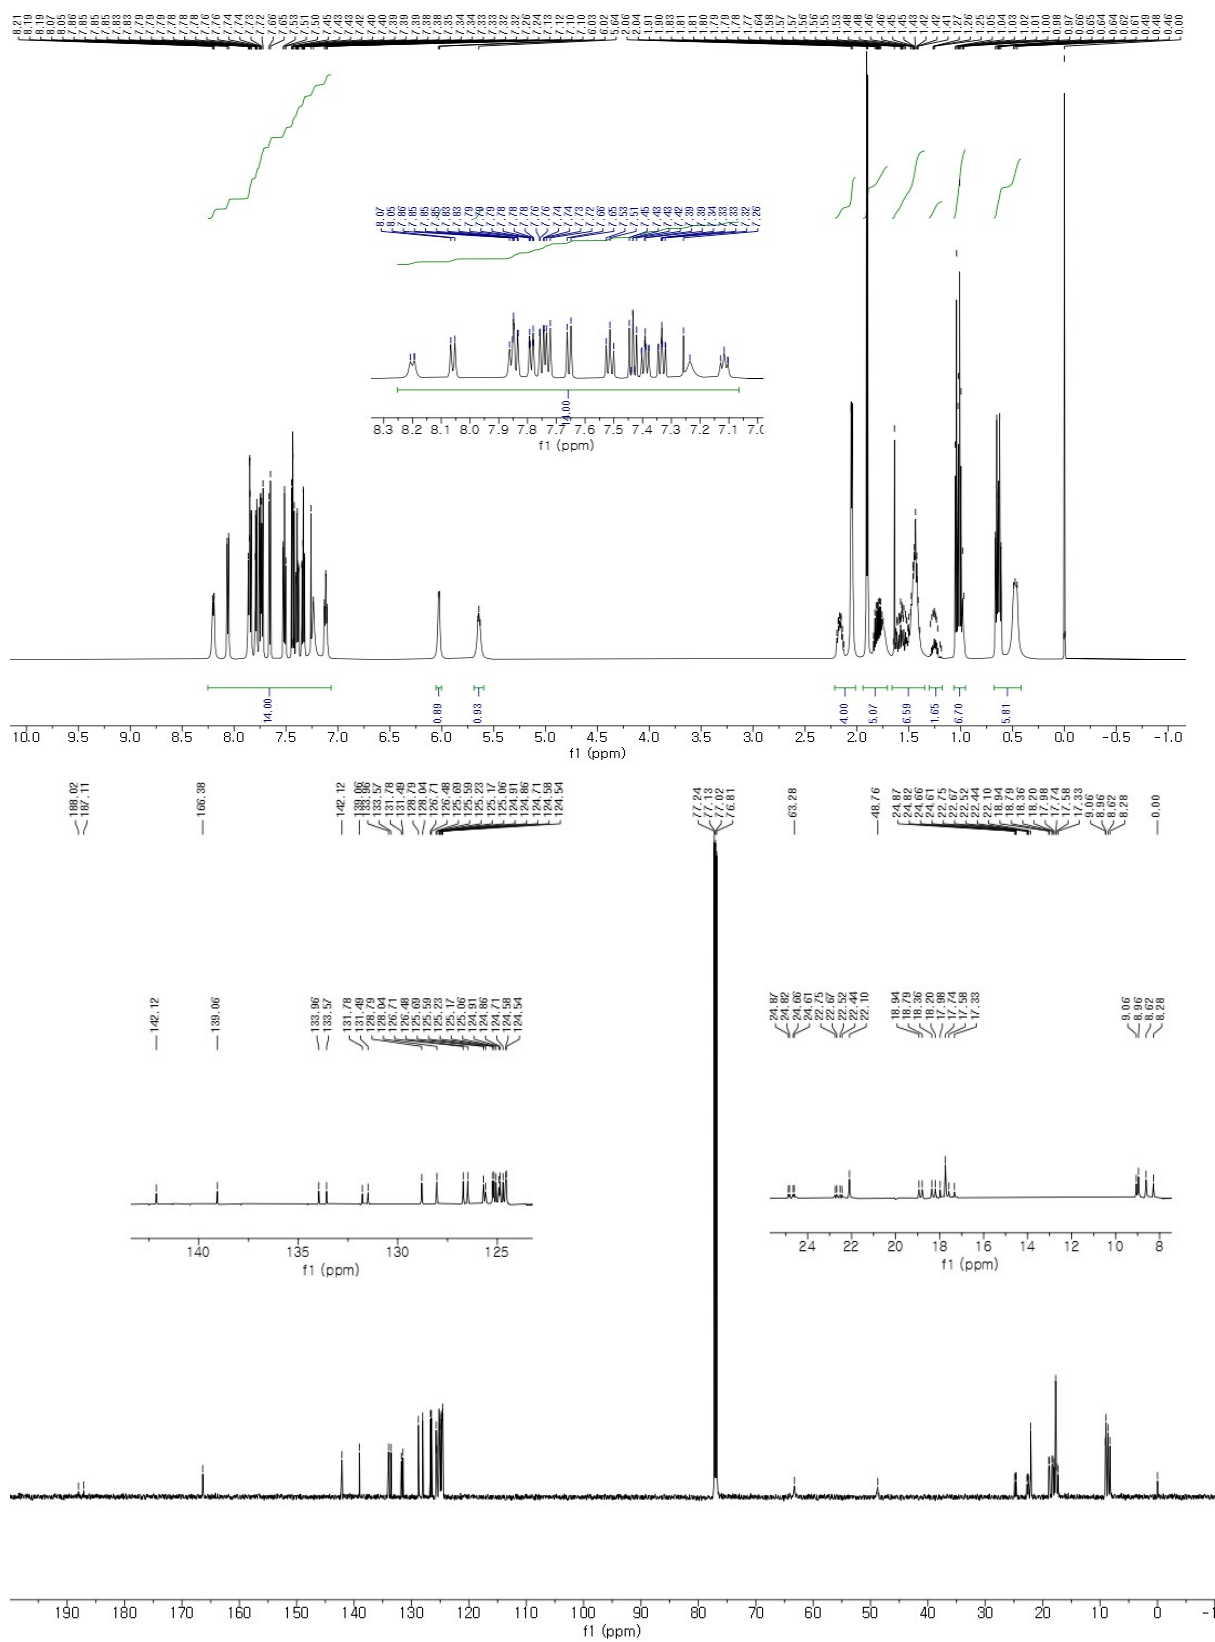

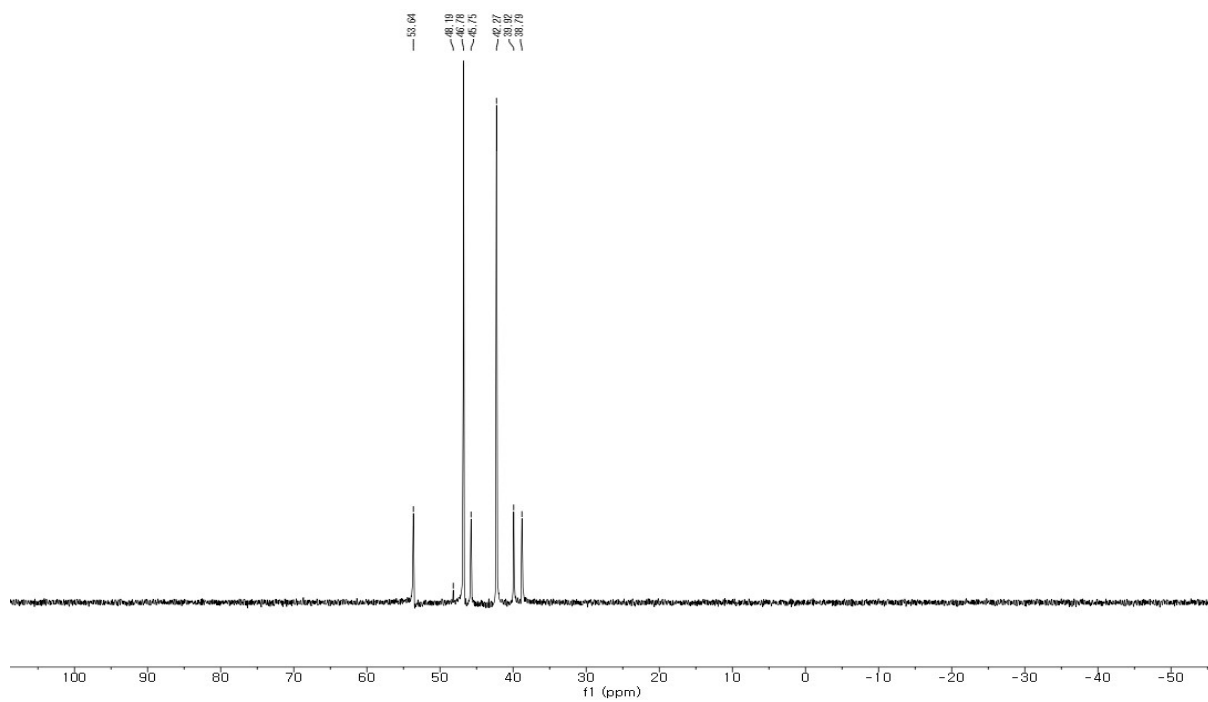

**Figure 18S.**  $^1\text{H}$ ,  $^{13}\text{C}\{^1\text{H}\}$  and  $^{31}\text{P}\{^1\text{H}\}$ -NMR spectra of  $\text{Pt}(\text{DEPE})\{-\text{N}(\text{R})\text{C}(\text{O})\text{N}(\text{R})\text{C}(\text{O})-\}$   $\{\text{R} = (\text{R})\text{-}(-)\text{-}1\text{-}(1\text{-naphthyl})\text{ethyl}\}$ , **18** in  $\text{CDCl}_3$ .

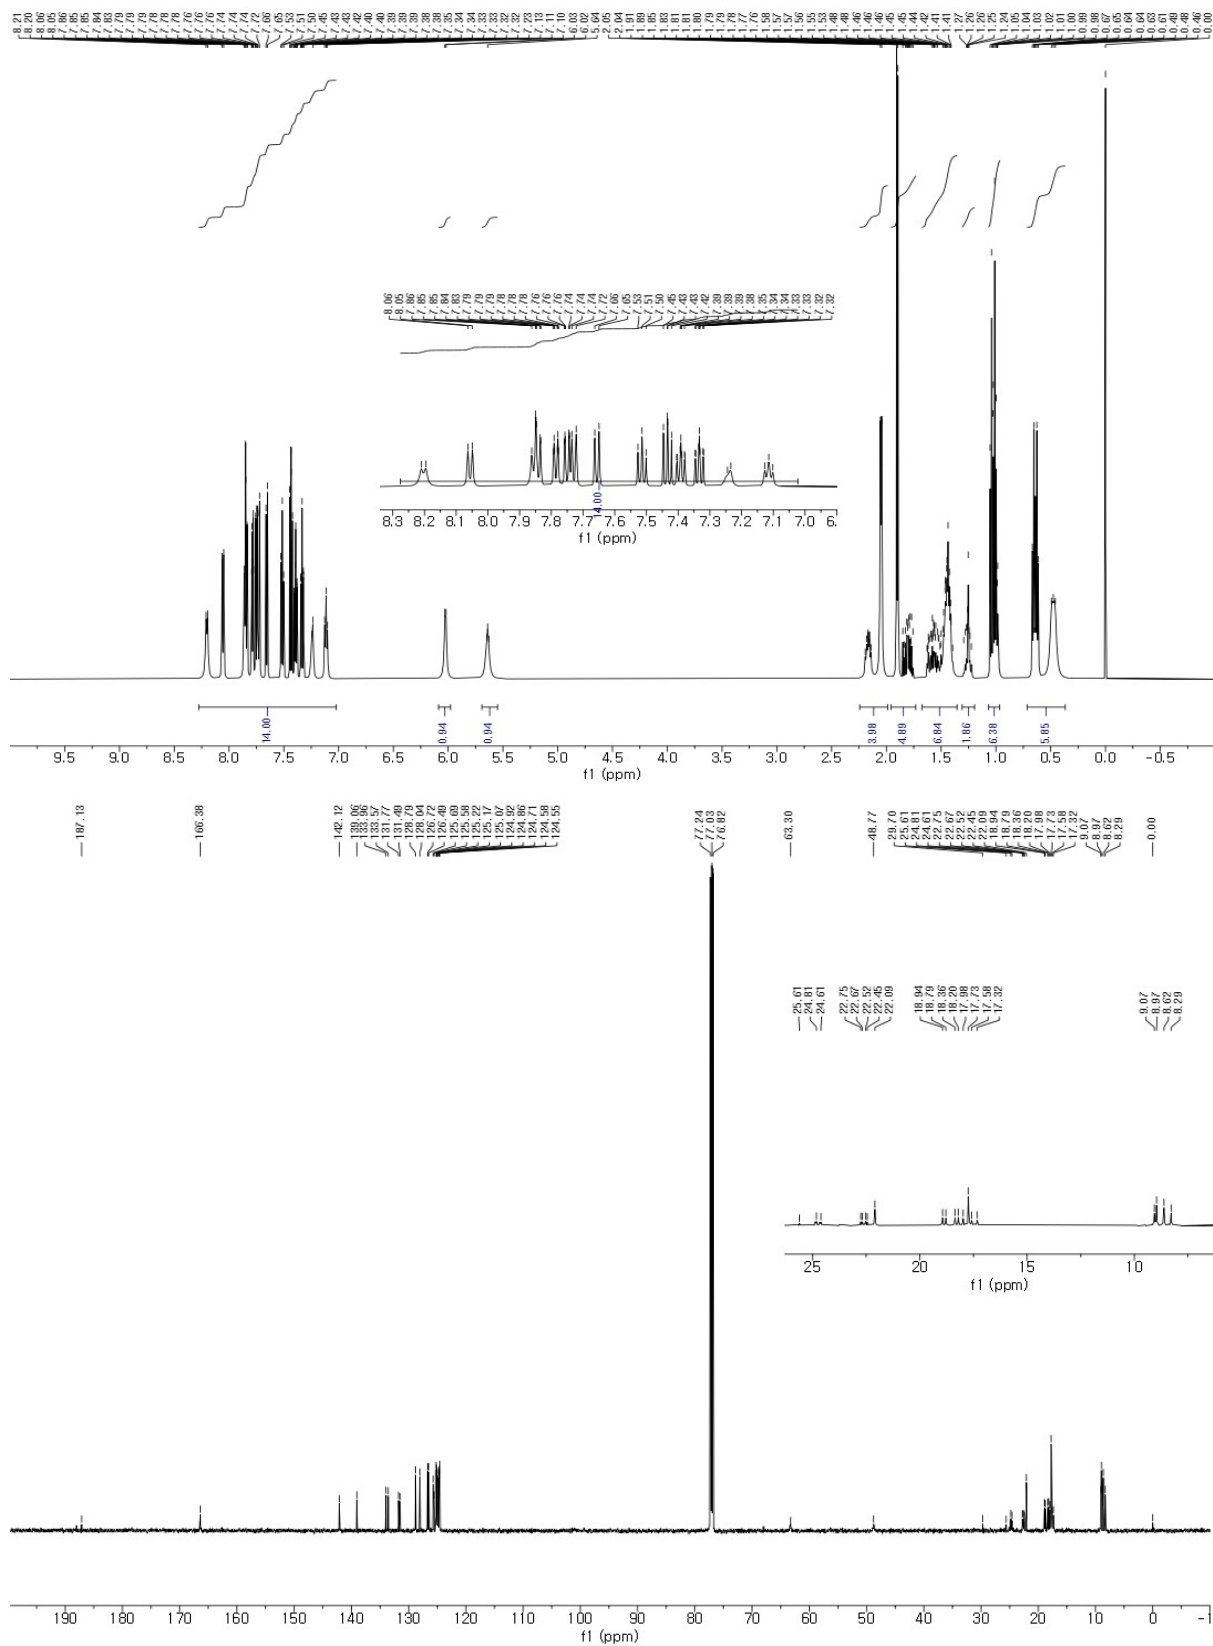

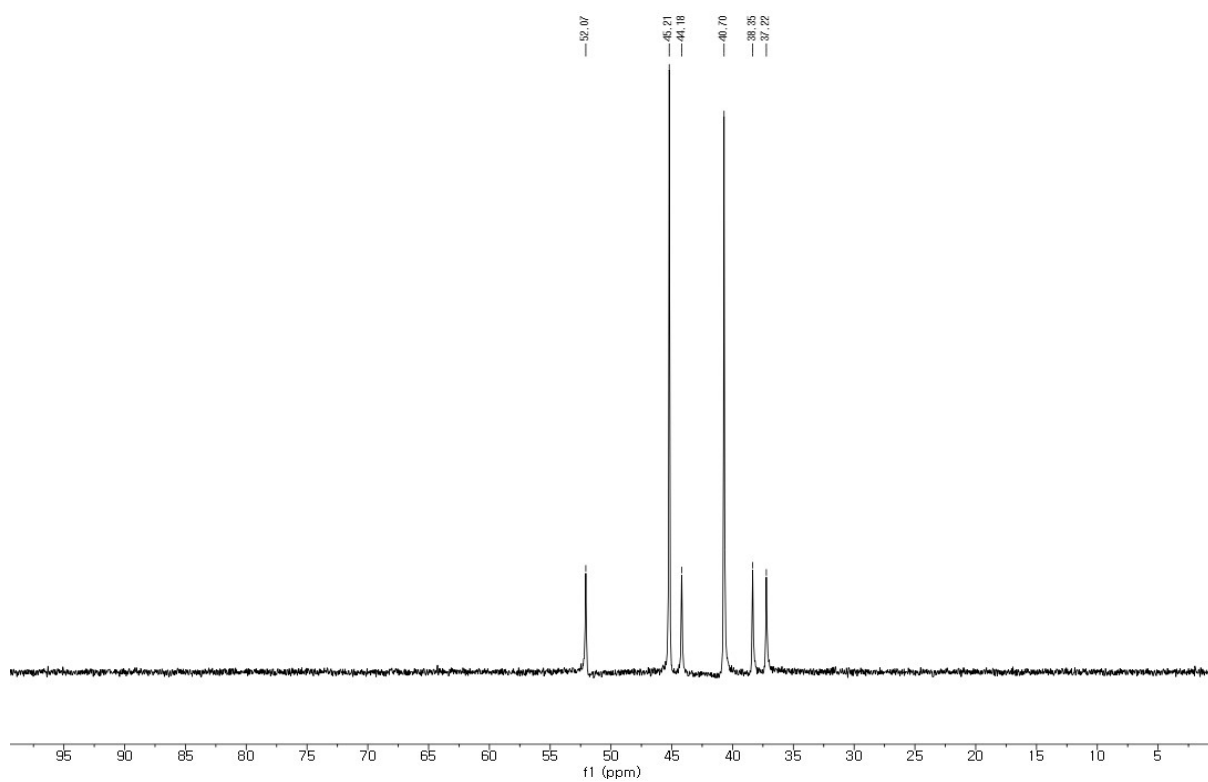

**Figure 19S.**  $^1\text{H}$  and  $^{13}\text{C}\{^1\text{H}\}$ -NMR spectra of [SIPr•Benzyl-NCO], **19** in  $\text{CDCl}_3$ .

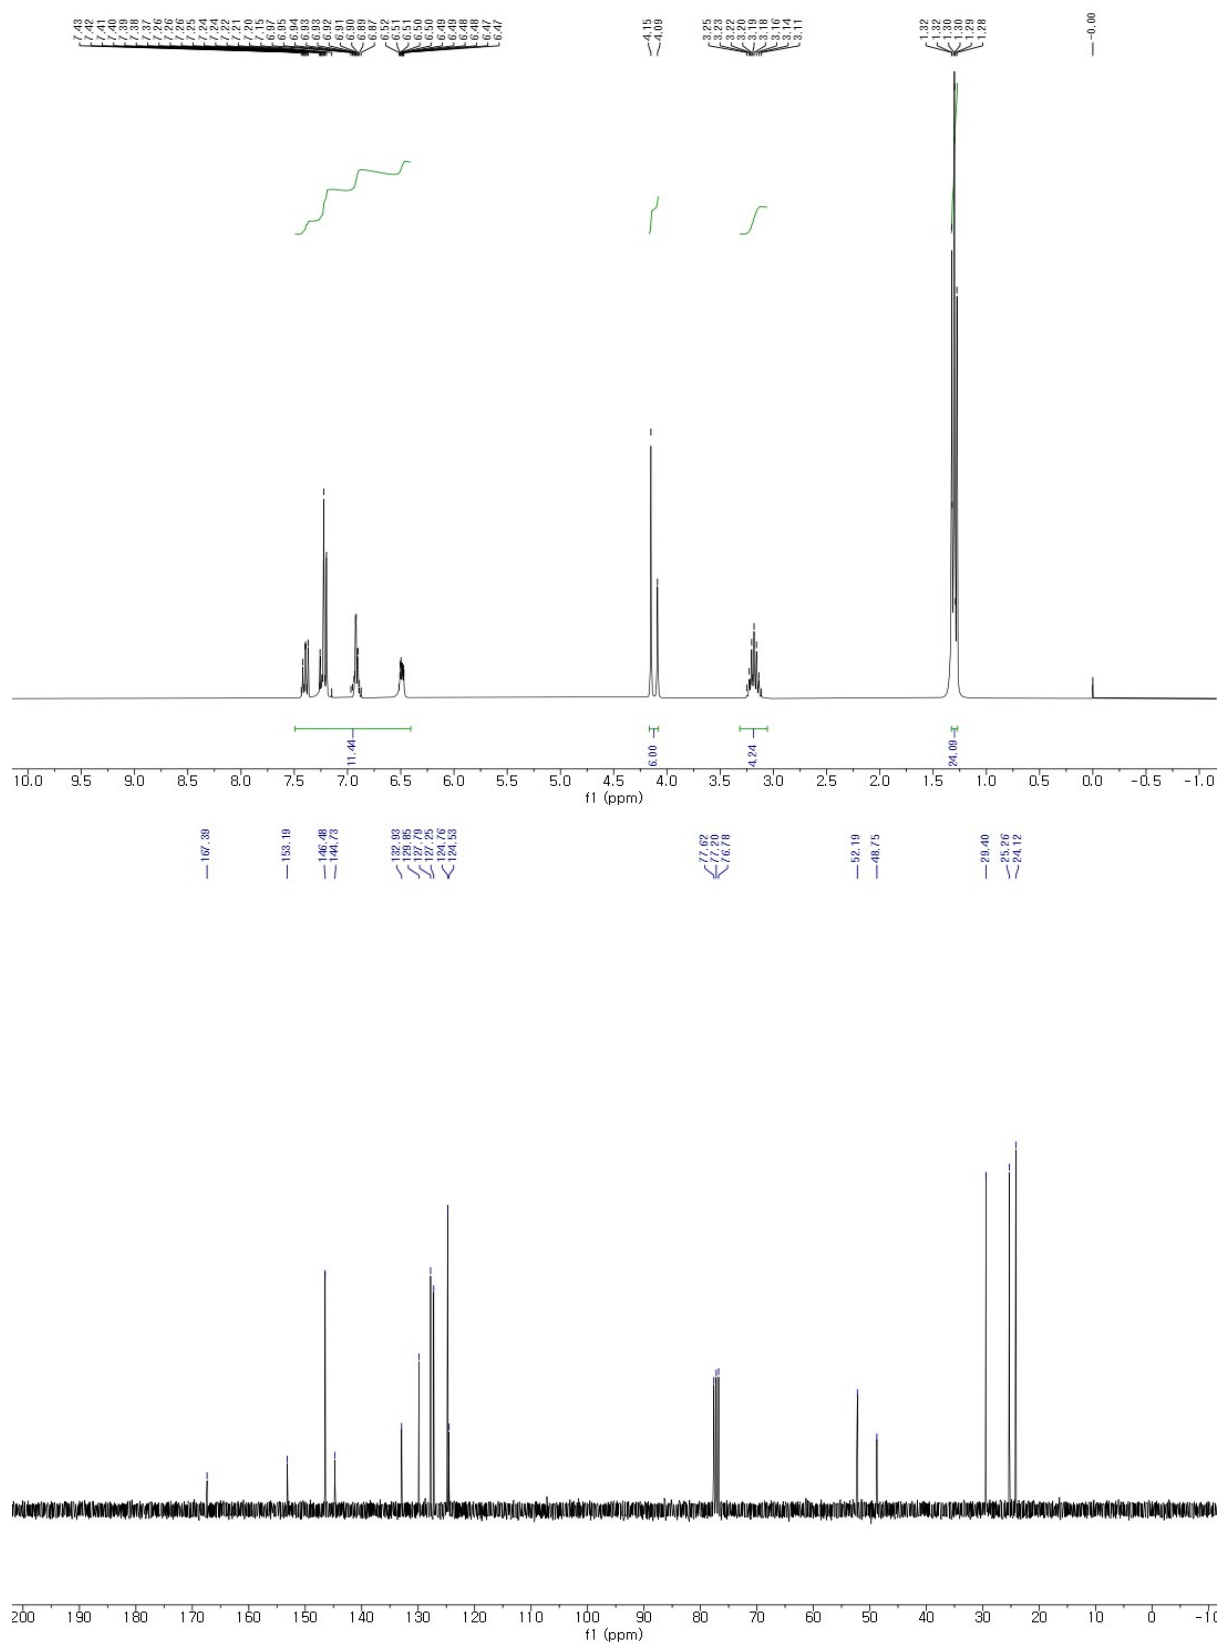

**Figure 20S.**  $^1\text{H}$  and  $^{13}\text{C}\{^1\text{H}\}$ -NMR spectra of [IPr•Phenyl-NCO], **20** in  $\text{CDCl}_3$ .

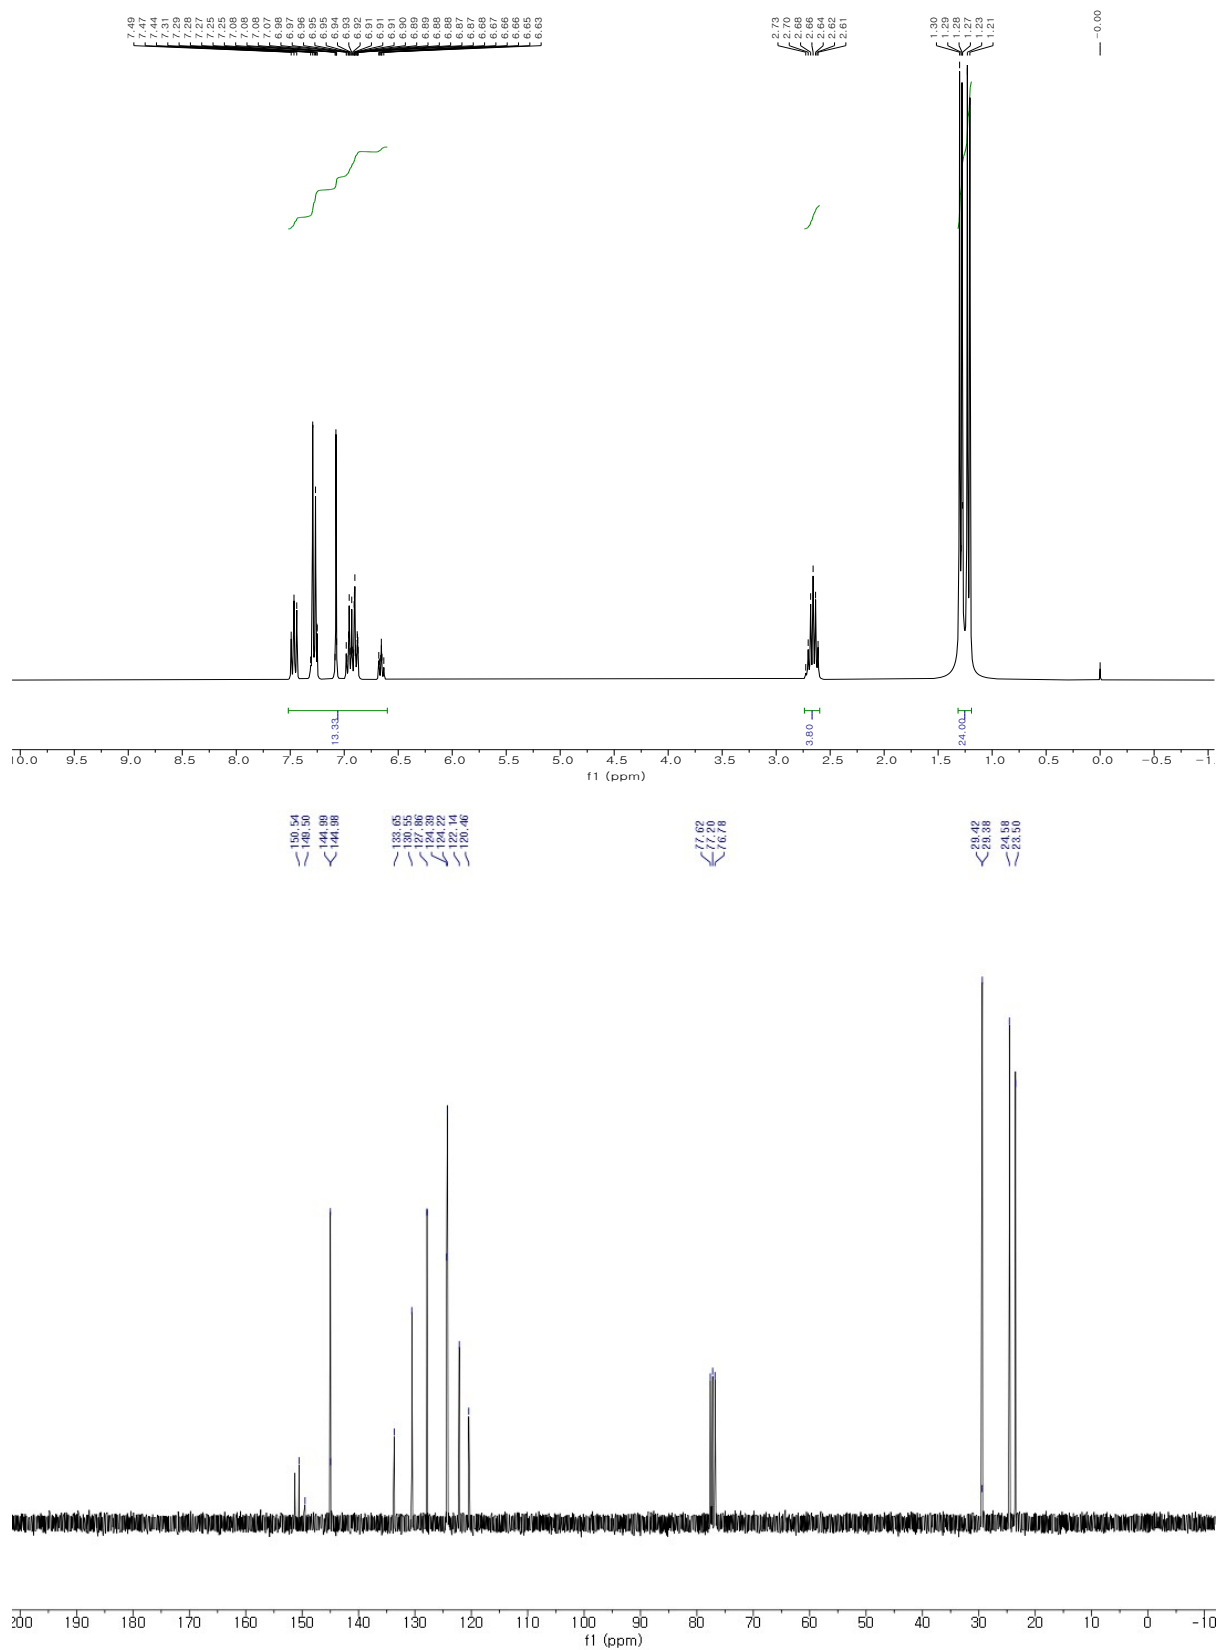

Supplement: c9nj03332g1.pdf [file c9nj03332g1.pdf]
